# Supplementary material
Source: publisher figshare collection journal article supplement (https://gsajournals.figshare.com/ndownloader/files/27678051)
Supplement: Supplementary file 1 [file 27678051]

## Sheet: Ss
File S3. GeneIDs, Codon Adaptation Index (CAI) values, fractional GC content, and GO term accession number of the 2% of genes with the highest and lowest CAI values for each Strongyloides species and C. elegans
Species	Gene ID	CAI by genus-specific usage rule	GC	Description	GO term ID
Ss	SSTP_0000290000.1	1	0.266667	Most-adapted genes
Ss	SSTP_0000067900.1	0.982665	0.176471	Most-adapted genes
Ss	SSTP_0001151000.1	0.850154	0.185185	Most-adapted genes
Ss	SSTP_0001248700.1	0.832132	0.278416	Most-adapted genes
Ss	SSTP_0000643500.1	0.829104	0.378205	Most-adapted genes	GO:0042025, GO:0000786, GO:0046982, GO:0003677, GO:0005634, GO:0005694
Ss	SSTP_0000911500.1	0.826385	0.323944	Most-adapted genes	GO:0008121, GO:0006122, GO:0055114, GO:0016020, GO:0005739, GO:0005743, GO:0070469
Ss	SSTP_0000019400.1	0.823754	0.219512	Most-adapted genes
Ss	SSTP_0000449100.1	0.822729	0.375123	Most-adapted genes
Ss	SSTP_0000552200.1	0.821706	0.386047	Most-adapted genes	GO:0005840, GO:0006412, GO:0003735
Ss	SSTP_0001210700.1	0.8199	0.378182	Most-adapted genes	GO:0042254
Ss	SSTP_0001150600.1	0.818403	0.373067	Most-adapted genes
Ss	SSTP_0000537050.1	0.813378	0.387387	Most-adapted genes
Ss	SSTP_0000168300.1	0.808457	0.347032	Most-adapted genes	GO:0006096, GO:0004332, GO:0003824, GO:0016829
Ss	SSTP_0000765700.1	0.807545	0.376812	Most-adapted genes	GO:0005840, GO:0006412, GO:0003735
Ss	SSTP_0001179400.1	0.807178	0.378961	Most-adapted genes	GO:0005840, GO:0006412, GO:0003735, GO:0003723, GO:0019843
Ss	SSTP_0000811600.1	0.806883	0.377193	Most-adapted genes
Ss	SSTP_0001226800.1	0.806566	0.349563	Most-adapted genes
Ss	SSTP_0000261700.1	0.806234	0.304348	Most-adapted genes
Ss	SSTP_0001083100.1	0.804586	0.499435	Most-adapted genes
Ss	SSTP_0001198800.1	0.804024	0.31825	Most-adapted genes	GO:0000166, GO:0005524, GO:0016020, GO:0016021
Ss	SSTP_0000548200.1	0.803354	0.284211	Most-adapted genes
Ss	SSTP_0001110800.1	0.803107	0.337037	Most-adapted genes
Ss	SSTP_0000767600.1	0.80272	0.303704	Most-adapted genes	GO:0005875, GO:0030286, GO:0007017, GO:0005737, GO:0005856, GO:0005874, GO:0003774
Ss	SSTP_0000525500.1	0.801997	0.382576	Most-adapted genes
Ss	SSTP_0000264100.1	0.801518	0.353755	Most-adapted genes	GO:0051015, GO:0016459, GO:0003774, GO:0005524, GO:0000166, GO:0003779
Ss	SSTP_0001089700.1	0.801476	0.215539	Most-adapted genes	GO:0016020, GO:0016021
Ss	SSTP_0000216800.1	0.800839	0.191489	Most-adapted genes
Ss	SSTP_0001090000.1	0.799344	0.343486	Most-adapted genes
Ss	SSTP_0000154300.1	0.797177	0.454955	Most-adapted genes	GO:0042302, GO:0016020, GO:0016021
Ss	SSTP_0000605400.1	0.797112	0.295019	Most-adapted genes
Ss	SSTP_0000882400.1	0.797058	0.255411	Most-adapted genes
Ss	SSTP_0000987400.1	0.796351	0.372898	Most-adapted genes
Ss	SSTP_0000050300.1	0.795038	0.319315	Most-adapted genes	GO:0005853, GO:0003746, GO:0006414, GO:0006412
Ss	SSTP_0000042700.1	0.794995	0.430303	Most-adapted genes	GO:0006414, GO:0005840, GO:0003735
Ss	SSTP_0001253800.2	0.793759	0.3577	Most-adapted genes	GO:0050661, GO:0006006, GO:0051287, GO:0016620, GO:0055114, GO:0000166, GO:0016491, GO:0006096, GO:0004365
Ss	SSTP_0001114600.1	0.792623	0.501096	Most-adapted genes	GO:0042302, GO:0016020, GO:0016021
Ss	SSTP_0000224000.1	0.792255	0.273092	Most-adapted genes	GO:0008289
Ss	SSTP_0000860700.1	0.791524	0.32619	Most-adapted genes	GO:0006102, GO:0004450, GO:0051287, GO:0016616, GO:0055114, GO:0000287, GO:0046872, GO:0016491, GO:0006099
Ss	SSTP_0000172300.1	0.791306	0.374741	Most-adapted genes
Ss	SSTP_0000623600.1	0.78985	0.360457	Most-adapted genes	GO:0006101, GO:0004108, GO:0046912, GO:0006099, GO:0016740
Ss	SSTP_0000258700.1	0.789565	0.505482	Most-adapted genes	GO:0042302, GO:0016020, GO:0016021
Ss	SSTP_0001091500.1	0.78944	0.322354	Most-adapted genes	GO:0005576, GO:0008061
Ss	SSTP_0000210400.1	0.787491	0.229773	Most-adapted genes
Ss	SSTP_0000177000.1	0.786855	0.368914	Most-adapted genes
Ss	SSTP_0001060100.1	0.786004	0.335021	Most-adapted genes	GO:0006556, GO:0004478, GO:0005524, GO:0000166, GO:0016740, GO:0046872, GO:0006730
Ss	SSTP_0001256000.1	0.785961	0.315193	Most-adapted genes	GO:0005615
Ss	SSTP_0000499800.1	0.784904	0.340727	Most-adapted genes	GO:0016639, GO:0006520, GO:0055114, GO:0016491, GO:0000166
Ss	SSTP_0000679600.1	0.784057	0.286885	Most-adapted genes
Ss	SSTP_0000150800.1	0.78401	0.34633	Most-adapted genes	GO:0004013, GO:0016787, GO:0006730
Ss	SSTP_0000438300.1	0.782997	0.336406	Most-adapted genes
Ss	SSTP_0000441400.1	0.782818	0.377369	Most-adapted genes
Ss	SSTP_0000756400.1	0.782515	0.344322	Most-adapted genes	GO:0008289
Ss	SSTP_0001026300.1	0.782139	0.289644	Most-adapted genes
Ss	SSTP_0001247000.1	0.780894	0.367003	Most-adapted genes	GO:0051920, GO:0016209, GO:0055114, GO:0016491, GO:0045454, GO:0098869
Ss	SSTP_0000629300.2	0.779635	0.300502	Most-adapted genes	GO:0008091, GO:0003779, GO:0005543, GO:0005200, GO:0005515, GO:0005737, GO:0005856, GO:0007010, GO:0051693
Ss	SSTP_0000197450.1	0.778706	0.239316	Most-adapted genes	GO:0016020, GO:0016021
Ss	SSTP_0000238200.1	0.778588	0.373898	Most-adapted genes
Ss	SSTP_0000520100.1	0.778324	0.422392	Most-adapted genes
Ss	SSTP_0000007000.1	0.778238	0.370869	Most-adapted genes
Ss	SSTP_0000756800.1	0.777682	0.335175	Most-adapted genes	GO:0008289
Ss	SSTP_0000570400.1	0.777186	0.246719	Most-adapted genes
Ss	SSTP_0000848500.1	0.776689	0.301587	Most-adapted genes
Ss	SSTP_0000860800.1	0.775805	0.35	Most-adapted genes	GO:0000413, GO:0003755, GO:0006457, GO:0016020, GO:0016021, GO:0016853
Ss	SSTP_0001186300.1	0.775654	0.343389	Most-adapted genes	GO:0000166, GO:0005524
Ss	SSTP_0001023500.1	0.775394	0.271825	Most-adapted genes	GO:0010309, GO:0055114
Ss	SSTP_0000882900.1	0.775383	0.346578	Most-adapted genes
Ss	SSTP_0000491300.1	0.775099	0.301648	Most-adapted genes	GO:0005509, GO:0005515
Ss	SSTP_0000843700.1	0.774195	0.390687	Most-adapted genes
Ss	SSTP_0000660200.1	0.774019	0.308591	Most-adapted genes	GO:0009448, GO:0003867, GO:0008483, GO:0030170, GO:0003824
Ss	SSTP_0000134400.1	0.773679	0.362618	Most-adapted genes
Ss	SSTP_0001018000.1	0.773052	0.342723	Most-adapted genes
Ss	SSTP_0001093000.1	0.772582	0.349858	Most-adapted genes	GO:0005882
Ss	SSTP_0001170300.1	0.772325	0.272727	Most-adapted genes
Ss	SSTP_0000890100.1	0.771345	0.359606	Most-adapted genes	GO:0015934, GO:0005840, GO:0006412, GO:0003735
Ss	SSTP_0000866500.1	0.771309	0.300214	Most-adapted genes	GO:0030246
Ss	SSTP_0000530400.1	0.771044	0.502732	Most-adapted genes	GO:0042302, GO:0016020, GO:0016021
Ss	SSTP_0000555600.1	0.770471	0.360931	Most-adapted genes	GO:0003824
Ss	SSTP_0000903900.1	0.769591	0.342306	Most-adapted genes	GO:0008556, GO:0006813, GO:0000166, GO:0016021, GO:0005524, GO:0046872, GO:0016020, GO:0006811, GO:0071805
Ss	SSTP_0000087500.1	0.769286	0.456546	Most-adapted genes	GO:0042302, GO:0016020, GO:0016021
Ss	SSTP_0000472100.1	0.769062	0.455721	Most-adapted genes	GO:0042302, GO:0016020, GO:0016021
Ss	SSTP_0000275100.1	0.768816	0.231746	Most-adapted genes
Ss	SSTP_0000239700.2	0.768625	0.394336	Most-adapted genes	GO:0006228, GO:0006183, GO:0006165, GO:0004550, GO:0006241, GO:0000166, GO:0005524, GO:0016301, GO:0016310, GO:0016740
Ss	SSTP_0000684100.1	0.768265	0.331169	Most-adapted genes	GO:0046872
Ss	SSTP_0000520600.2	0.7681	0.37015	Most-adapted genes
Ss	SSTP_0000526300.1	0.767886	0.230047	Most-adapted genes	GO:0016020, GO:0016021
Ss	SSTP_0000867400.1	0.767674	0.375181	Most-adapted genes
Ss	SSTP_0000573000.1	0.767466	0.361389	Most-adapted genes	GO:0003756, GO:0045454, GO:0016853
Ss	SSTP_0000266200.1	0.767462	0.284483	Most-adapted genes	GO:0004602, GO:0006979, GO:0055114, GO:0016491, GO:0098869, GO:0004601
Ss	SSTP_0001109900.1	0.767383	0.365596	Most-adapted genes
Ss	SSTP_0000085800.1	0.767197	0.384058	Most-adapted genes	GO:0003796
Ss	SSTP_0001245300.1	0.76684	0.308699	Most-adapted genes
Ss	SSTP_0000215300.1	0.766613	0.356955	Most-adapted genes	GO:0003779
Ss	SSTP_0000559400.1	0.76607	0.420925	Most-adapted genes	GO:0000786, GO:0046982, GO:0003677, GO:0005634, GO:0005694
Ss	SSTP_0001213000.1	0.765964	0.25977	Most-adapted genes
Ss	SSTP_0000782800.1	0.765783	0.293996	Most-adapted genes
Ss	SSTP_0000089100.1	0.76557	0.319728	Most-adapted genes
Ss	SSTP_0000060600.1	0.765155	0.306962	Most-adapted genes	GO:0005509
Ss	SSTP_0000260900.1	0.764778	0.528497	Most-adapted genes
Ss	SSTP_0001075100.1	0.764649	0.280528	Most-adapted genes	GO:0005509
Ss	SSTP_0000248800.1	0.764535	0.272727	Most-adapted genes	GO:0005515, GO:0016020, GO:0016021
Ss	SSTP_0001088500.1	0.764523	0.319138	Most-adapted genes	GO:0051015, GO:0016459, GO:0003774, GO:0005524, GO:0000166, GO:0003779
Ss	SSTP_0000127500.1	0.764406	0.412281	Most-adapted genes	GO:0005840, GO:0006412, GO:0003735
Ss	SSTP_0000539800.1	0.763891	0.333333	Most-adapted genes	GO:0008121, GO:0022900
Ss	SSTP_0000622400.1	0.763847	0.458746	Most-adapted genes	GO:0042302, GO:0016020, GO:0016021
Ss	SSTP_0000478200.1	0.763692	0.320287	Most-adapted genes	GO:0016620, GO:0055114, GO:0016491
Ss	SSTP_0000873400.1	0.763264	0.294574	Most-adapted genes
Ss	SSTP_0000748800.1	0.762588	0.34006	Most-adapted genes	GO:0005200, GO:0005874, GO:0007017, GO:0003924, GO:0005525, GO:0000166, GO:0005737, GO:0005856, GO:0007010
Ss	SSTP_0000556800.1	0.761894	0.447811	Most-adapted genes	GO:0042302, GO:0016020, GO:0016021
Ss	SSTP_0000366100.1	0.761851	0.255869	Most-adapted genes
Ss	SSTP_0000129900.1	0.761751	0.411765	Most-adapted genes
Ss	SSTP_0000636100.1	0.76111	0.378186	Most-adapted genes
Ss	SSTP_0001183800.1	0.761064	0.355	Most-adapted genes
Ss	SSTP_0000858000.1	0.760818	0.305691	Most-adapted genes
Ss	SSTP_0000102800.1	0.760714	0.492605	Most-adapted genes	GO:0042302
Ss	SSTP_0000911800.1	0.760292	0.271028	Most-adapted genes
Ss	SSTP_0000052900.1	0.760289	0.381526	Most-adapted genes	GO:0005840, GO:0006412, GO:0003735
Ss	SSTP_0000614100.1	0.760133	0.359606	Most-adapted genes	GO:0004190, GO:0006508, GO:0016787, GO:0008233
Ss	SSTP_0000423300.1	0.7599	0.285185	Most-adapted genes
Ss	SSTP_0000864200.1	0.759656	0.217822	Most-adapted genes
Ss	SSTP_0000973700.1	0.758977	0.318182	Most-adapted genes
Ss	SSTP_0000624400.1	0.758884	0.330108	Most-adapted genes	GO:0005347, GO:0005743, GO:0055085, GO:0022857, GO:0016020, GO:0016021, GO:0015867
Ss	SSTP_0001210800.1	0.75878	0.343434	Most-adapted genes
Ss	SSTP_0000270800.1	0.758727	0.402116	Most-adapted genes
Ss	SSTP_0000580900.1	0.758576	0.307971	Most-adapted genes	GO:0003755, GO:0016853, GO:0000413
Ss	SSTP_0000522100.1	0.758495	0.296	Most-adapted genes	GO:0006629, GO:0016020, GO:0016021
Ss	SSTP_0001165900.1	0.758153	0.375674	Most-adapted genes
Ss	SSTP_0001231900.1	0.758121	0.307242	Most-adapted genes	GO:0003723, GO:0003676
Ss	SSTP_0001097200.1	0.757529	0.248756	Most-adapted genes
Ss	SSTP_0000611200.1	0.757435	0.362022	Most-adapted genes	GO:0000463, GO:0022625, GO:0003735
Ss	SSTP_0001187100.1	0.757179	0.306931	Most-adapted genes
Ss	SSTP_0000044100.1	0.757147	0.455414	Most-adapted genes	GO:0042302, GO:0016020, GO:0016021
Ss	SSTP_0000469200.1	0.757118	0.31985	Most-adapted genes	GO:0005093, GO:0005092, GO:0007264, GO:0015031, GO:0005737, GO:0043547, GO:0005096, GO:0050790
Ss	SSTP_0001077600.2	0.757055	0.419355	Most-adapted genes
Ss	SSTP_0000000300.1	0.75701	0.279297	Most-adapted genes
Ss	SSTP_0000061700.1	0.756995	0.325788	Most-adapted genes	GO:0016020, GO:0016021
Ss	SSTP_0000770300.1	0.756859	0.335859	Most-adapted genes
Ss	SSTP_0000985300.1	0.756818	0.357895	Most-adapted genes
Ss	SSTP_0000040000.2	0.756753	0.381403	Most-adapted genes	GO:0005861, GO:0006937
Ss	SSTP_0000853100.1	0.756743	0.31015	Most-adapted genes	GO:0016020, GO:0016021
Ss	SSTP_0000961300.1	0.756721	0.320164	Most-adapted genes	GO:0051015, GO:0016459, GO:0003774, GO:0005524, GO:0000166, GO:0003779
Ss	SSTP_0000179500.1	0.756375	0.353276	Most-adapted genes
Ss	SSTP_0000911900.1	0.756048	0.32807	Most-adapted genes	GO:0005576, GO:0008061
Ss	SSTP_0000730000.1	0.756024	0.363409	Most-adapted genes	GO:0003723, GO:0022625
Ss	SSTP_0000107800.1	0.755605	0.238095	Most-adapted genes
Ss	SSTP_0000004100.1	0.755514	0.22973	Most-adapted genes
Ss	SSTP_0000829900.1	0.755166	0.309246	Most-adapted genes
Ss	SSTP_0000003600.1	0.7551	0.284553	Most-adapted genes	GO:0016021, GO:0016740, GO:0016020, GO:0006629, GO:0006631, GO:0006633, GO:0102336, GO:0102337, GO:0102338, GO:0102756
Ss	SSTP_0000297800.1	0.754617	0.405104	Most-adapted genes	GO:0015935, GO:0006412, GO:0003735, GO:0003723, GO:0005840
Ss	SSTP_0000504600.1	0.754611	0.310474	Most-adapted genes	GO:0006457, GO:0051082, GO:0005524
Ss	SSTP_0000033500.1	0.75448	0.315152	Most-adapted genes	GO:0005615
Ss	SSTP_0000494200.1	0.754434	0.336617	Most-adapted genes
Ss	SSTP_0000273500.1	0.754133	0.439252	Most-adapted genes	GO:0042302, GO:0016020, GO:0016021
Ss	SSTP_0001198900.2	0.753746	0.302694	Most-adapted genes
Ss	SSTP_0001066300.1	0.753703	0.381343	Most-adapted genes	GO:0003924, GO:0005525
Ss	SSTP_0000494400.1	0.753617	0.395773	Most-adapted genes	GO:0005347, GO:0055085, GO:0016020, GO:0016021, GO:0015867
Ss	SSTP_0001154400.1	0.75359	0.315206	Most-adapted genes
Ss	SSTP_0000103600.1	0.753534	0.388379	Most-adapted genes	GO:0005515
Ss	SSTP_0000119100.1	0.753523	0.369547	Most-adapted genes	GO:0005840, GO:0006412, GO:0003735
Ss	SSTP_0001234900.1	0.753333	0.311111	Most-adapted genes
Ss	SSTP_0000383100.1	0.753266	0.315683	Most-adapted genes	GO:0051015, GO:0016459, GO:0003774, GO:0005524, GO:0000166, GO:0003779
Ss	SSTP_0000891600.1	0.753247	0.221505	Most-adapted genes	GO:0016020, GO:0016021
Ss	SSTP_0000143400.1	0.753088	0.362637	Most-adapted genes	GO:0005840, GO:0006412, GO:0003735
Ss	SSTP_0000269800.1	0.752977	0.360071	Most-adapted genes	GO:0046314, GO:0004111, GO:0016772, GO:0016301, GO:0003824, GO:0000166, GO:0005524, GO:0016310, GO:0016740
Ss	SSTP_0000584100.1	0.752877	0.318966	Most-adapted genes	GO:0016020, GO:0016021
Ss	SSTP_0000151800.1	0.752744	0.347126	Most-adapted genes	GO:0004013, GO:0016787, GO:0006730
Ss	SSTP_0000379600.1	0.752722	0.350211	Most-adapted genes
Ss	SSTP_0000911300.1	0.752532	0.350192	Most-adapted genes	GO:0000015, GO:0004634, GO:0006096, GO:0000287
Ss	SSTP_0000286800.1	0.75244	0.450276	Most-adapted genes	GO:0042302, GO:0016020, GO:0016021
Ss	SSTP_0000248100.1	0.752174	0.261762	Most-adapted genes
Ss	SSTP_0000339800.1	0.751891	0.391137	Most-adapted genes	GO:0005840, GO:0006412, GO:0003735
Ss	SSTP_0000507900.1	0.751841	0.35097	Most-adapted genes	GO:0005509
Ss	SSTP_0000785500.1	0.751299	0.286885	Most-adapted genes
Ss	SSTP_0001168700.1	0.751117	0.387914	Most-adapted genes	GO:0050661, GO:0006006, GO:0051287, GO:0016620, GO:0055114, GO:0000166, GO:0016491, GO:0006096, GO:0004365
Ss	SSTP_0000990900.1	0.750917	0.315152	Most-adapted genes
Ss	SSTP_0000172200.1	0.750602	0.389937	Most-adapted genes
Ss	SSTP_0000288700.1	0.750585	0.30352	Most-adapted genes
Ss	SSTP_0000129000.1	0.750306	0.204301	Most-adapted genes
Ss	SSTP_0001213100.1	0.750119	0.309201	Most-adapted genes
Ss	SSTP_0000504100.1	0.749841	0.353909	Most-adapted genes
Ss	SSTP_0000753500.1	0.749475	0.385382	Most-adapted genes	GO:0005347, GO:0005743, GO:0055085, GO:0022857, GO:0016020, GO:0016021, GO:0015867
Ss	SSTP_0001040900.2	0.74944	0.272217	Most-adapted genes	GO:0005509, GO:0005515, GO:0016020, GO:0016021
Ss	SSTP_0000664600.1	0.749424	0.366784	Most-adapted genes
Ss	SSTP_0000510400.1	0.749268	0.518519	Most-adapted genes	GO:0042302
Ss	SSTP_0000504500.1	0.748351	0.356667	Most-adapted genes	GO:0016020, GO:0016021
Ss	SSTP_0000112800.1	0.747971	0.35728	Most-adapted genes	GO:0016020, GO:0016021
Ss	SSTP_0000412300.1	0.747866	0.347653	Most-adapted genes	GO:0003746, GO:0006414, GO:0005515, GO:0006412
Ss	SSTP_0001106900.1	0.747834	0.369529	Most-adapted genes	GO:0004190, GO:0006508, GO:0016787, GO:0008233
Ss	SSTP_0001111000.1	0.747775	0.243446	Most-adapted genes
Ss	SSTP_0000984700.1	0.747575	0.371231	Most-adapted genes
Ss	SSTP_0000132300.1	0.747451	0.386034	Most-adapted genes
Ss	SSTP_0001278100.2	0.747096	0.341085	Most-adapted genes	GO:0030246
Ss	SSTP_0000758500.1	0.74708	0.330275	Most-adapted genes	GO:0016020, GO:0016021
Ss	SSTP_0001145500.1	0.746669	0.280857	Most-adapted genes	GO:0008168
Ss	SSTP_0001042950.1	0.746597	0.214092	Most-adapted genes
Ss	SSTP_0000948800.1	0.746025	0.487179	Most-adapted genes
Ss	SSTP_0000823300.1	0.745824	0.394737	Most-adapted genes	GO:0045261, GO:0046933, GO:0015986, GO:0046034, GO:1902600, GO:0005524, GO:0000166, GO:0006754
Ss	SSTP_0000960700.1	0.745735	0.339202	Most-adapted genes	GO:0098656, GO:0008308, GO:0005741, GO:0055085, GO:0015698
Ss	SSTP_0000876300.1	0.745704	0.223022	Most-adapted genes
Ss	SSTP_0001025400.1	0.745508	0.410526	Most-adapted genes
Ss	SSTP_0000275600.1	0.745506	0.326027	Most-adapted genes	GO:0008234, GO:0006508
Ss	SSTP_0000407800.1	0.745503	0.347498	Most-adapted genes	GO:1902560, GO:0009117, GO:0003920, GO:0055114, GO:0016491, GO:0003824, GO:0046872, GO:0006144, GO:0006163
Ss	SSTP_0000147300.1	0.745417	0.426593	Most-adapted genes	GO:0042302, GO:0016020, GO:0016021
Ss	SSTP_0001151300.1	0.745389	0.373919	Most-adapted genes
Ss	SSTP_0000940500.1	0.745244	0.357724	Most-adapted genes	GO:0006457, GO:0051082, GO:0005524, GO:0000166
Ss	SSTP_0000086600.1	0.745053	0.371576	Most-adapted genes	GO:0022900, GO:0016627, GO:0050660, GO:0006099, GO:0055114, GO:0016491, GO:0016020, GO:0005743, GO:0008177
Ss	SSTP_0001127700.1	0.744994	0.320728	Most-adapted genes	GO:0018996, GO:0004222, GO:0008237, GO:0006508, GO:0008270, GO:0005576
Ss	SSTP_0000684000.1	0.744874	0.279835	Most-adapted genes
Ss	SSTP_0000631700.1	0.744833	0.217631	Most-adapted genes
Ss	SSTP_0001281900.1	0.744704	0.21393	Most-adapted genes
Ss	SSTP_0000178000.1	0.744702	0.273705	Most-adapted genes
Ss	SSTP_0001100100.1	0.744691	0.208333	Most-adapted genes	GO:0003700, GO:0006355
Ss	SSTP_0000126600.1	0.744474	0.27027	Most-adapted genes
Ss	SSTP_0001228900.1	0.744096	0.375887	Most-adapted genes
Ss	SSTP_0001244100.1	0.743985	0.351442	Most-adapted genes	GO:0033180, GO:0046034, GO:1902600, GO:0005524, GO:0006811
Ss	SSTP_0000522300.1	0.743769	0.390244	Most-adapted genes
Ss	SSTP_0000466900.1	0.743578	0.261458	Most-adapted genes	GO:0005509
Ss	SSTP_0001024100.1	0.743489	0.337121	Most-adapted genes	GO:0005634, GO:0003677
Ss	SSTP_0000247700.1	0.743376	0.269863	Most-adapted genes	GO:0007155
Ss	SSTP_0000167300.1	0.743045	0.261006	Most-adapted genes	GO:0008146
Ss	SSTP_0001103200.1	0.742818	0.5	Most-adapted genes
Ss	SSTP_0000695200.1	0.742689	0.338528	Most-adapted genes
Ss	SSTP_0000180100.1	0.742549	0.232184	Most-adapted genes
Ss	SSTP_0000920600.1	0.742466	0.39611	Most-adapted genes	GO:0000166, GO:0005524, GO:0005737, GO:0005856
Ss	SSTP_0000079900.1	0.742208	0.493377	Most-adapted genes	GO:0042302, GO:0016020, GO:0016021
Ss	SSTP_0000615000.3	0.742159	0.209957	Most-adapted genes
Ss	SSTP_0001004100.1	0.741807	0.387164	Most-adapted genes	GO:0005840, GO:0006412, GO:0003735
Ss	SSTP_0000947900.1	0.741806	0.322799	Most-adapted genes	GO:0005200, GO:0005874, GO:0007017, GO:0003924, GO:0005525, GO:0000166, GO:0005737, GO:0005856, GO:0007010
Ss	SSTP_0001050400.1	0.741747	0.247748	Most-adapted genes
Ss	SSTP_0000384900.1	0.741715	0.24359	Most-adapted genes
Ss	SSTP_0001110900.1	0.741584	0.337165	Most-adapted genes
Ss	SSTP_0000893200.1	0.741354	0.294798	Most-adapted genes
Ss	SSTP_0000930900.1	0.741232	0.420343	Most-adapted genes	GO:0015935, GO:0005840, GO:0006412, GO:0003735, GO:0003723, GO:1990904
Ss	SSTP_0000272000.1	0.741197	0.262153	Most-adapted genes	GO:0004867, GO:0010951
Ss	SSTP_0001042100.1	0.741168	0.216074	Most-adapted genes
Ss	SSTP_0001040800.1	0.74106	0.296764	Most-adapted genes	GO:0051015, GO:0016459, GO:0003774, GO:0005515, GO:0005524, GO:0000166, GO:0003779
Ss	SSTP_0001090500.1	0.740922	0.306616	Most-adapted genes	GO:0016020, GO:0016021
Ss	SSTP_0000899200.1	0.74092	0.280597	Most-adapted genes
Ss	SSTP_0000135600.1	0.740739	0.294253	Most-adapted genes	GO:0005615, GO:0016020, GO:0016021
Ss	SSTP_0000249800.1	0.740697	0.359292	Most-adapted genes	GO:0042026, GO:0006457, GO:0005524
Ss	SSTP_0000340000.1	0.740428	0.390424	Most-adapted genes	GO:0015934, GO:0005840, GO:0006412, GO:0003735
Ss	SSTP_0000156700.1	0.740102	0.235582	Most-adapted genes
Ss	SSTP_0000628900.1	0.740099	0.284685	Most-adapted genes
Ss	SSTP_0000680200.1	0.739705	0.320728	Most-adapted genes	GO:0018996, GO:0004222, GO:0008237, GO:0006508, GO:0008270, GO:0005576
Ss	SSTP_0001110000.1	0.739542	0.366701	Most-adapted genes
Ss	SSTP_0000826400.1	0.739464	0.241956	Most-adapted genes	GO:0046983
Ss	SSTP_0000373800.1	0.739451	0.256127	Most-adapted genes
Ss	SSTP_0001085200.1	0.739251	0.420179	Most-adapted genes	GO:0015934, GO:0005840, GO:0006412, GO:0003735, GO:0003723
Ss	SSTP_0000480600.1	0.738857	0.377129	Most-adapted genes	GO:0000786, GO:0046982, GO:0003677, GO:0005634, GO:0005694
Ss	SSTP_0001125700.1	0.738822	0.309063	Most-adapted genes	GO:0000220, GO:0033179, GO:0015078, GO:1902600, GO:0016020, GO:0016021, GO:0006811
Ss	SSTP_0000127800.1	0.73874	0.309693	Most-adapted genes	GO:0006633
Ss	SSTP_0000870600.1	0.738619	0.405797	Most-adapted genes	GO:0042302, GO:0016020, GO:0016021
Ss	SSTP_0000366600.1	0.738532	0.265591	Most-adapted genes
Ss	SSTP_0000439300.1	0.738467	0.261229	Most-adapted genes
Ss	SSTP_0001184800.1	0.738299	0.29561	Most-adapted genes	GO:0000221, GO:0046961, GO:1902600, GO:0005515, GO:0006811
Ss	SSTP_0001024900.1	0.738011	0.342222	Most-adapted genes	GO:0033178, GO:0046961, GO:1902600
Ss	SSTP_0000714200.1	0.737909	0.272569	Most-adapted genes	GO:0007050, GO:0004861, GO:0005634, GO:0045736
Ss	SSTP_0000477900.1	0.73755	0.416918	Most-adapted genes	GO:0042302, GO:0016020, GO:0016021
Ss	SSTP_0000443900.1	0.737329	0.287129	Most-adapted genes
Ss	SSTP_0000549200.1	0.737317	0.326201	Most-adapted genes	GO:0051536, GO:0051539, GO:0005737
Ss	SSTP_0000748900.1	0.73719	0.311594	Most-adapted genes	GO:0042744, GO:0004096, GO:0006979, GO:0020037, GO:0055114, GO:0046872, GO:0016491, GO:0098869, GO:0004601
Ss	SSTP_0000818600.1	0.736772	0.419872	Most-adapted genes	GO:0042025, GO:0000786, GO:0046982, GO:0003677, GO:0005634, GO:0005694
Ss	SSTP_0000278500.1	0.138766	0.376853	Least-adapted genes
Ss	SSTP_0001128500.1	0.167205	0.294118	Least-adapted genes
Ss	SSTP_0000808800.1	0.178739	0.453125	Least-adapted genes
Ss	SSTP_0000465500.1	0.195886	0.396552	Least-adapted genes
Ss	SSTP_0001133900.1	0.212993	0.413793	Least-adapted genes
Ss	SSTP_0000698900.1	0.25513	0.419355	Least-adapted genes
Ss	SSTP_0000617700.1	0.26649	0.37931	Least-adapted genes
Ss	SSTP_0000015300.1	0.267835	0.509009	Least-adapted genes
Ss	SSTP_0000036200.1	0.274177	0.433735	Least-adapted genes	GO:0016020, GO:0016021
Ss	SSTP_0000658675.1	0.274285	0.478632	Least-adapted genes
Ss	SSTP_0000141050.1	0.27592	0.525	Least-adapted genes
Ss	SSTP_0000844800.1	0.277995	0.388158	Least-adapted genes
Ss	SSTP_0000946900.1	0.28512	0.441989	Least-adapted genes
Ss	SSTP_0000547100.1	0.286154	0.497717	Least-adapted genes
Ss	SSTP_0000301166.1	0.287806	0.464539	Least-adapted genes
Ss	SSTP_0001284500.1	0.292625	0.491667	Least-adapted genes
Ss	SSTP_0000012000.1	0.30132	0.438406	Least-adapted genes
Ss	SSTP_0001038600.1	0.302232	0.452242	Least-adapted genes
Ss	SSTP_0001270400.1	0.30495	0.437681	Least-adapted genes
Ss	SSTP_0000275550.1	0.307686	0.435185	Least-adapted genes
Ss	SSTP_0001133400.1	0.311736	0.265306	Least-adapted genes
Ss	SSTP_0001209800.1	0.311736	0.265306	Least-adapted genes
Ss	SSTP_0001285100.1	0.313828	0.413333	Least-adapted genes
Ss	SSTP_0000744800.1	0.315599	0.309179	Least-adapted genes	GO:0016020, GO:0016021
Ss	SSTP_0001269900.1	0.317391	0.413333	Least-adapted genes	GO:0006313, GO:0003677, GO:0015074
Ss	SSTP_0000453200.1	0.317585	0.44863	Least-adapted genes
Ss	SSTP_0001038450.1	0.319671	0.457875	Least-adapted genes
Ss	SSTP_0001014300.1	0.322039	0.438272	Least-adapted genes
Ss	SSTP_0001198050.1	0.326219	0.431866	Least-adapted genes
Ss	SSTP_0001198150.1	0.326219	0.431866	Least-adapted genes
Ss	SSTP_0000979900.1	0.330203	0.352941	Least-adapted genes
Ss	SSTP_0000987300.1	0.330589	0.217391	Least-adapted genes
Ss	SSTP_0001213750.1	0.33061	0.422222	Least-adapted genes
Ss	SSTP_0001038000.1	0.334005	0.370085	Least-adapted genes
Ss	SSTP_0000336300.1	0.336681	0.467091	Least-adapted genes
Ss	SSTP_0000294900.1	0.336892	0.5	Least-adapted genes
Ss	SSTP_0000763350.1	0.338063	0.414414	Least-adapted genes
Ss	SSTP_0000701100.1	0.338605	0.423559	Least-adapted genes	GO:0043565, GO:0003677
Ss	SSTP_0001257100.1	0.341317	0.358209	Least-adapted genes
Ss	SSTP_0000458200.1	0.344065	0.401515	Least-adapted genes
Ss	SSTP_0001102900.1	0.345338	0.375	Least-adapted genes
Ss	SSTP_0001149300.1	0.345638	0.4	Least-adapted genes
Ss	SSTP_0000704866.1	0.345652	0.362319	Least-adapted genes
Ss	SSTP_0001074300.1	0.346791	0.39819	Least-adapted genes
Ss	SSTP_0000572100.1	0.348236	0.359882	Least-adapted genes
Ss	SSTP_0000636500.1	0.349292	0.3613	Least-adapted genes
Ss	SSTP_0000338500.1	0.350399	0.413889	Least-adapted genes
Ss	SSTP_0001127600.1	0.350482	0.381988	Least-adapted genes	GO:0016020, GO:0016021
Ss	SSTP_0000483384.1	0.350646	0.396594	Least-adapted genes
Ss	SSTP_0000421012.1	0.352344	0.338095	Least-adapted genes
Ss	SSTP_0001038500.1	0.352687	0.397088	Least-adapted genes
Ss	SSTP_0000704833.1	0.354332	0.360294	Least-adapted genes	GO:0003676, GO:0008270
Ss	SSTP_0000289250.1	0.355427	0.336364	Least-adapted genes
Ss	SSTP_0000453400.1	0.355874	0.347619	Least-adapted genes
Ss	SSTP_0000429800.1	0.359927	0.404301	Least-adapted genes
Ss	SSTP_0000482800.1	0.360506	0.311111	Least-adapted genes
Ss	SSTP_0000755600.1	0.361077	0.418333	Least-adapted genes	GO:0016020, GO:0016021
Ss	SSTP_0000300500.1	0.361669	0.309249	Least-adapted genes	GO:0016020, GO:0016021
Ss	SSTP_0000007300.1	0.361791	0.368159	Least-adapted genes
Ss	SSTP_0000567500.1	0.362711	0.427702	Least-adapted genes
Ss	SSTP_0001199650.1	0.362791	0.505279	Least-adapted genes
Ss	SSTP_0001285300.1	0.363488	0.505556	Least-adapted genes
Ss	SSTP_0001037200.1	0.36349	0.395604	Least-adapted genes
Ss	SSTP_0001076933.1	0.366519	0.327635	Least-adapted genes	GO:0016020, GO:0016021
Ss	SSTP_0000842300.1	0.366633	0.367698	Least-adapted genes
Ss	SSTP_0000469600.1	0.366705	0.402083	Least-adapted genes
Ss	SSTP_0000351000.2	0.367625	0.378559	Least-adapted genes
Ss	SSTP_0000064000.1	0.368949	0.327869	Least-adapted genes
Ss	SSTP_0000064600.1	0.370971	0.401905	Least-adapted genes
Ss	SSTP_0000642350.1	0.37142	0.36478	Least-adapted genes
Ss	SSTP_0001133000.1	0.371812	0.395425	Least-adapted genes
Ss	SSTP_0000301133.1	0.374627	0.413194	Least-adapted genes
Ss	SSTP_0000013700.1	0.375297	0.336283	Least-adapted genes	GO:0016020, GO:0016021
Ss	SSTP_0000465625.1	0.376682	0.444444	Least-adapted genes
Ss	SSTP_0000630400.1	0.379325	0.352941	Least-adapted genes
Ss	SSTP_0001081400.1	0.379985	0.37535	Least-adapted genes
Ss	SSTP_0000132100.1	0.380312	0.382979	Least-adapted genes
Ss	SSTP_0000066700.1	0.380832	0.354839	Least-adapted genes	GO:0016020, GO:0016021
Ss	SSTP_0000843350.1	0.381196	0.351449	Least-adapted genes
Ss	SSTP_0000025000.1	0.384146	0.404762	Least-adapted genes	GO:0016538, GO:0000079, GO:0007049, GO:0051301
Ss	SSTP_0000861500.1	0.384297	0.392638	Least-adapted genes
Ss	SSTP_0000480400.1	0.385186	0.375479	Least-adapted genes
Ss	SSTP_0000005700.1	0.38571	0.332	Least-adapted genes
Ss	SSTP_0000334500.1	0.385742	0.3875	Least-adapted genes
Ss	SSTP_0000479750.1	0.386956	0.128205	Least-adapted genes	GO:0016020, GO:0016021
Ss	SSTP_0000006800.1	0.387697	0.380117	Least-adapted genes
Ss	SSTP_0000492850.1	0.388034	0.40404	Least-adapted genes	GO:0016020, GO:0016021
Ss	SSTP_0000944100.1	0.390105	0.415385	Least-adapted genes
Ss	SSTP_0000876525.1	0.39091	0.450794	Least-adapted genes
Ss	SSTP_0001104500.1	0.391517	0.269231	Least-adapted genes	GO:0016020, GO:0016021
Ss	SSTP_0001117400.1	0.391681	0.369369	Least-adapted genes
Ss	SSTP_0000666250.1	0.392164	0.352617	Least-adapted genes
Ss	SSTP_0000034850.1	0.392345	0.310658	Least-adapted genes
Ss	SSTP_0001148200.1	0.393613	0.4	Least-adapted genes
Ss	SSTP_0000019200.1	0.393637	0.362745	Least-adapted genes
Ss	SSTP_0000487700.1	0.393707	0.336061	Least-adapted genes	GO:0004190, GO:0006508
Ss	SSTP_0000987200.1	0.394806	0.385185	Least-adapted genes
Ss	SSTP_0000520500.1	0.394998	0.388889	Least-adapted genes
Ss	SSTP_0000883900.1	0.395009	0.368421	Least-adapted genes
Ss	SSTP_0000722100.1	0.396144	0.378223	Least-adapted genes
Ss	SSTP_0001269800.1	0.396461	0.337507	Least-adapted genes	GO:0004190, GO:0003676, GO:0006508, GO:0008270
Ss	SSTP_0000421036.1	0.396914	0.344444	Least-adapted genes	GO:0006556, GO:0004478
Ss	SSTP_0000838000.1	0.39718	0.362319	Least-adapted genes	GO:0031390, GO:0007064
Ss	SSTP_0000984400.2	0.3974	0.355828	Least-adapted genes
Ss	SSTP_0000638500.1	0.397524	0.315634	Least-adapted genes
Ss	SSTP_0001073200.1	0.397945	0.369919	Least-adapted genes
Ss	SSTP_0000884800.1	0.398798	0.365909	Least-adapted genes	GO:0003676
Ss	SSTP_0000421500.1	0.399277	0.33657	Least-adapted genes
Ss	SSTP_0001106700.1	0.39959	0.411348	Least-adapted genes	GO:0033617, GO:0016021, GO:0016020, GO:0005739
Ss	SSTP_0000288400.1	0.400189	0.393562	Least-adapted genes	GO:0006470, GO:0004725, GO:0016311, GO:0016791, GO:0016787, GO:0035335, GO:0004721
Ss	SSTP_0000124500.1	0.400382	0.360856	Least-adapted genes	GO:0006352, GO:0003677
Ss	SSTP_0000811700.1	0.400778	0.413462	Least-adapted genes
Ss	SSTP_0000973625.1	0.401521	0.365079	Least-adapted genes
Ss	SSTP_0000987500.1	0.401905	0.369697	Least-adapted genes
Ss	SSTP_0000933800.1	0.40286	0.312169	Least-adapted genes
Ss	SSTP_0001053800.1	0.403438	0.371429	Least-adapted genes
Ss	SSTP_0000322600.1	0.403938	0.347418	Least-adapted genes
Ss	SSTP_0000666400.1	0.404064	0.326044	Least-adapted genes
Ss	SSTP_0001143100.1	0.404745	0.365196	Least-adapted genes
Ss	SSTP_0000691400.1	0.405205	0.373366	Least-adapted genes	GO:0001664, GO:0031683, GO:0019001, GO:0007186, GO:0003924, GO:0007165, GO:0000166, GO:0005525
Ss	SSTP_0000664800.1	0.405441	0.344828	Least-adapted genes
Ss	SSTP_0001020200.1	0.405931	0.279642	Least-adapted genes	GO:0016020, GO:0016021
Ss	SSTP_0001071600.1	0.406949	0.324786	Least-adapted genes
Ss	SSTP_0001130700.1	0.407168	0.410714	Least-adapted genes
Ss	SSTP_0000947100.1	0.408441	0.342048	Least-adapted genes
Ss	SSTP_0000983400.1	0.409317	0.357942	Least-adapted genes	GO:0016020, GO:0016021
Ss	SSTP_0000289200.1	0.410182	0.371841	Least-adapted genes
Ss	SSTP_0000666450.1	0.410507	0.330667	Least-adapted genes
Ss	SSTP_0000376700.1	0.410531	0.371212	Least-adapted genes
Ss	SSTP_0000842500.1	0.41099	0.357923	Least-adapted genes	GO:0003676
Ss	SSTP_0001283400.1	0.411523	0.390313	Least-adapted genes
Ss	SSTP_0000468200.1	0.41154	0.380952	Least-adapted genes
Ss	SSTP_0001174100.1	0.411577	0.284553	Least-adapted genes	GO:0019348, GO:0030234, GO:0030176, GO:0016020, GO:0016021, GO:0005783, GO:0005789, GO:0006486, GO:0050790
Ss	SSTP_0001130800.1	0.412005	0.363636	Least-adapted genes	GO:0003676
Ss	SSTP_0000981400.1	0.412132	0.311436	Least-adapted genes	GO:0004322, GO:0016226, GO:0005739, GO:0008199, GO:0055114
Ss	SSTP_0000761900.1	0.412532	0.336508	Least-adapted genes
Ss	SSTP_0000653750.1	0.41284	0.329167	Least-adapted genes	GO:0016020, GO:0016021
Ss	SSTP_0000636000.1	0.413038	0.361789	Least-adapted genes
Ss	SSTP_0000987600.1	0.413252	0.08	Least-adapted genes
Ss	SSTP_0000289133.1	0.413332	0.358974	Least-adapted genes
Ss	SSTP_0000985800.1	0.413398	0.364583	Least-adapted genes	GO:0003676, GO:0008270
Ss	SSTP_0001215600.1	0.413796	0.35958	Least-adapted genes	GO:0016020, GO:0016021
Ss	SSTP_0001263000.1	0.413929	0.369637	Least-adapted genes
Ss	SSTP_0000644700.1	0.414033	0.337972	Least-adapted genes	GO:0003676
Ss	SSTP_0000289666.1	0.414365	0.369099	Least-adapted genes
Ss	SSTP_0000708700.1	0.414476	0.344322	Least-adapted genes	GO:0006556, GO:0004478
Ss	SSTP_0000642500.1	0.415792	0.367314	Least-adapted genes	GO:0016020, GO:0016021
Ss	SSTP_0000388600.2	0.416933	0.335784	Least-adapted genes	GO:0071595, GO:0035307, GO:0016020, GO:0016021
Ss	SSTP_0000066300.1	0.416951	0.362869	Least-adapted genes
Ss	SSTP_0000861425.1	0.417092	0.421189	Least-adapted genes
Ss	SSTP_0000707000.1	0.417397	0.398333	Least-adapted genes
Ss	SSTP_0000617800.1	0.417433	0.428571	Least-adapted genes
Ss	SSTP_0000602500.1	0.417537	0.412316	Least-adapted genes
Ss	SSTP_0000986200.1	0.41761	0.325581	Least-adapted genes
Ss	SSTP_0001072900.1	0.417835	0.354105	Least-adapted genes
Ss	SSTP_0000004650.1	0.419539	0.358423	Least-adapted genes	GO:0003677
Ss	SSTP_0000441500.1	0.420371	0.376147	Least-adapted genes
Ss	SSTP_0000135200.1	0.420963	0.320331	Least-adapted genes
Ss	SSTP_0000636400.1	0.421021	0.317789	Least-adapted genes
Ss	SSTP_0000692700.1	0.421218	0.351608	Least-adapted genes	GO:0055085, GO:0022857, GO:0016020, GO:0016021
Ss	SSTP_0000316600.1	0.421389	0.290909	Least-adapted genes
Ss	SSTP_0000639200.1	0.421641	0.348337	Least-adapted genes	GO:0015074, GO:0003676
Ss	SSTP_0000639100.1	0.422099	0.334375	Least-adapted genes
Ss	SSTP_0001073100.1	0.422226	0.302326	Least-adapted genes
Ss	SSTP_0000353900.1	0.422907	0.344262	Least-adapted genes
Ss	SSTP_0000837700.1	0.422945	0.372043	Least-adapted genes	GO:0016020, GO:0016021
Ss	SSTP_0000487875.1	0.423137	0.361111	Least-adapted genes
Ss	SSTP_0000693200.1	0.423456	0.346863	Least-adapted genes
Ss	SSTP_0000935500.1	0.423641	0.338129	Least-adapted genes	GO:0016020, GO:0016021
Ss	SSTP_0000068000.1	0.424153	0.215385	Least-adapted genes
Ss	SSTP_0000539300.1	0.424178	0.370031	Least-adapted genes
Ss	SSTP_0000666300.1	0.424223	0.330808	Least-adapted genes	GO:0004190, GO:0006508
Ss	SSTP_0001022750.1	0.424432	0.385185	Least-adapted genes
Ss	SSTP_0000811250.1	0.425134	0.37037	Least-adapted genes
Ss	SSTP_0000016400.1	0.425299	0.352941	Least-adapted genes	GO:0016020, GO:0016021
Ss	SSTP_0001149400.1	0.425822	0.331551	Least-adapted genes
Ss	SSTP_0000326200.1	0.426305	0.329268	Least-adapted genes	GO:0004222, GO:0016020, GO:0006508, GO:0016021
Ss	SSTP_0000287200.1	0.42634	0.345609	Least-adapted genes	GO:0004190, GO:0003676, GO:0006508, GO:0008270
Ss	SSTP_0000990700.1	0.42634	0.345609	Least-adapted genes	GO:0004190, GO:0003676, GO:0006508, GO:0008270
Ss	SSTP_0001012000.1	0.426657	0.45	Least-adapted genes	GO:0016020, GO:0016021
Ss	SSTP_0001257850.1	0.427271	0.35119	Least-adapted genes
Ss	SSTP_0001151100.1	0.427351	0.37276	Least-adapted genes	GO:0006470, GO:0004725, GO:0016311, GO:0016791, GO:0016787, GO:0035335, GO:0004721
Ss	SSTP_0000811800.1	0.427709	0.378378	Least-adapted genes
Ss	SSTP_0000947000.1	0.428005	0.354902	Least-adapted genes
Ss	SSTP_0000421100.1	0.428085	0.354037	Least-adapted genes
Ss	SSTP_0000633200.1	0.428191	0.275449	Least-adapted genes	GO:0016020, GO:0016021
Ss	SSTP_0000465700.1	0.428382	0.337349	Least-adapted genes
Ss	SSTP_0000679800.1	0.428899	0.380542	Least-adapted genes	GO:0006470, GO:0004725, GO:0016311, GO:0016791, GO:0016787, GO:0035335, GO:0004721
Ss	SSTP_0000066500.1	0.429547	0.353293	Least-adapted genes
Ss	SSTP_0000308000.1	0.429653	0.374556	Least-adapted genes	GO:0005524, GO:0000166
Ss	SSTP_0001074200.1	0.430892	0.370188	Least-adapted genes	GO:0006470, GO:0004725, GO:0035335
Ss	SSTP_0000005900.1	0.430972	0.347398	Least-adapted genes
Ss	SSTP_0000985700.1	0.431496	0.340782	Least-adapted genes	GO:0015074, GO:0003676
Ss	SSTP_0000345500.1	0.431597	0.383988	Least-adapted genes	GO:0006470, GO:0004725, GO:0016020, GO:0016021, GO:0035335
Ss	SSTP_0000455400.1	0.431613	0.336788	Least-adapted genes
Ss	SSTP_0001277900.1	0.431781	0.312977	Least-adapted genes
Ss	SSTP_0000441300.1	0.431942	0.347096	Least-adapted genes	GO:0015074, GO:0003676
Ss	SSTP_0000458900.1	0.43197	0.363556	Least-adapted genes	GO:0006470, GO:0004725, GO:0016311, GO:0016791, GO:0016787, GO:0016020, GO:0016021, GO:0035335, GO:0004721
Ss	SSTP_0000690100.1	0.432019	0.347099	Least-adapted genes	GO:0016020, GO:0016021
Ss	SSTP_0001208100.1	0.432119	0.382429	Least-adapted genes	GO:0005665, GO:0006351, GO:0003899, GO:0003677, GO:0005634
Ss	SSTP_0000982900.1	0.432912	0.382429	Least-adapted genes
Ss	SSTP_0000952700.1	0.433061	0.326733	Least-adapted genes
Ss	SSTP_0000026700.1	0.433238	0.363296	Least-adapted genes	GO:0006470, GO:0004725, GO:0016311, GO:0016791, GO:0016787, GO:0016020, GO:0016021, GO:0035335, GO:0004721
Ss	SSTP_0001178000.5	0.433442	0.352533	Least-adapted genes	GO:0003677, GO:0015074, GO:0003676, GO:0008270
Ss	SSTP_0000875000.1	0.433477	0.345029	Least-adapted genes
Ss	SSTP_0000063700.1	0.434378	0.279412	Least-adapted genes
Ss	SSTP_0000112000.1	0.434419	0.359712	Least-adapted genes	GO:0046982, GO:0005634
Ss	SSTP_0000475000.1	0.434493	0.40566	Least-adapted genes	GO:0016020, GO:0016021
Ss	SSTP_0000347100.1	0.434697	0.319865	Least-adapted genes	GO:0004721, GO:0006397, GO:0005634, GO:0006470
Ss	SSTP_0001208400.1	0.434751	0.338129	Least-adapted genes	GO:0051537, GO:0009055, GO:0051536, GO:0022900
Ss	SSTP_0001134100.1	0.435207	0.365024	Least-adapted genes	GO:0006470, GO:0004725, GO:0016311, GO:0016791, GO:0016787, GO:0016020, GO:0016021, GO:0035335, GO:0004721
Ss	SSTP_0000064900.1	0.435491	0.334076	Least-adapted genes	GO:0004523, GO:0003676, GO:0090502
Ss	SSTP_0000861600.1	0.435559	0.371308	Least-adapted genes
Ss	SSTP_0000067000.1	0.435559	0.360825	Least-adapted genes
Ss	SSTP_0001283700.1	0.435701	0.395062	Least-adapted genes
Ss	SSTP_0000479100.1	0.43572	0.341085	Least-adapted genes
Ss	SSTP_0001221500.1	0.435906	0.380779	Least-adapted genes	GO:0006470, GO:0004725, GO:0016311, GO:0016791, GO:0016787, GO:0035335, GO:0004721
Ss	SSTP_0000707500.1	0.435918	0.388235	Least-adapted genes
Ss	SSTP_0000005200.1	0.436517	0.37415	Least-adapted genes
Ss	SSTP_0001284100.1	0.436579	0.306306	Least-adapted genes	GO:0016020, GO:0016021
Ss	SSTP_0000112400.1	0.436795	0.287719	Least-adapted genes
Ss	SSTP_0000827800.1	0.436971	0.359788	Least-adapted genes
Ss	SSTP_0000299000.1	0.437223	0.324405	Least-adapted genes
Ss	SSTP_0001284900.1	0.437576	0.392405	Least-adapted genes
Ss	SSTP_0000636300.2	0.437618	0.330275	Least-adapted genes
Ss	SSTP_0000487800.1	0.437679	0.335034	Least-adapted genes	GO:0032196, GO:0015074, GO:0003676
Ss	SSTP_0000006600.1	0.437719	0.383333	Least-adapted genes
Ss	SSTP_0000563600.1	0.437832	0.372807	Least-adapted genes
Ss	SSTP_0001140100.1	0.437888	0.366608	Least-adapted genes	GO:0006470, GO:0004725, GO:0016311, GO:0016791, GO:0016787, GO:0016020, GO:0016021, GO:0035335, GO:0004721
Ss	SSTP_0000644300.1	0.437924	0.363395	Least-adapted genes	GO:0015074, GO:0003676
Ss	SSTP_0000258350.1	0.438104	0.344086	Least-adapted genes
Ss	SSTP_0000696800.1	0.438178	0.337369	Least-adapted genes	GO:0005667, GO:0003700, GO:0006355, GO:0051726, GO:0005634, GO:0003677
Ss	SSTP_0000699200.1	0.438334	0.33506	Least-adapted genes	GO:0015074, GO:0003676, GO:0008270
Ss	SSTP_0000464100.1	0.438449	0.328928	Least-adapted genes
Ss	SSTP_0000420800.1	0.438807	0.383055	Least-adapted genes	GO:0006470, GO:0004725, GO:0035335
Ss	SSTP_0001278000.1	0.439138	0.3404	Least-adapted genes	GO:0032196, GO:0015074, GO:0003676
Ss	SSTP_0001039100.1	0.439244	0.3147	Least-adapted genes	GO:0015074, GO:0003676
Ss	SSTP_0000539100.1	0.439356	0.301587	Least-adapted genes
Ss	SSTP_0001102700.1	0.439435	0.314554	Least-adapted genes
Ss	SSTP_0001031600.1	0.439437	0.336296	Least-adapted genes
Ss	SSTP_0000705133.1	0.439873	0.331624	Least-adapted genes	GO:0016020, GO:0016021
Ss	SSTP_0000179100.1	0.440388	0.287671	Least-adapted genes	GO:0016020, GO:0016021
Ss	SSTP_0000462700.1	0.440718	0.358553	Least-adapted genes	GO:0051092, GO:0042058, GO:0030335, GO:0008283, GO:0005154, GO:0031532, GO:0004713, GO:0005515, GO:0018108
Ss	SSTP_0000636200.1	0.440799	0.386874	Least-adapted genes	GO:0003676, GO:0008270, GO:0016020, GO:0016021
Ss	SSTP_0000387100.1	0.440805	0.365979	Least-adapted genes	GO:0016020, GO:0016021
Ss	SSTP_0000999800.1	0.440928	0.373618	Least-adapted genes	GO:0016020, GO:0016021
Ss	SSTP_0000714800.1	0.441586	0.349333	Least-adapted genes
Ss	SSTP_0000688700.1	0.441753	0.346421	Least-adapted genes	GO:0015074, GO:0003676
Ss	SSTP_0001071000.1	0.442014	0.342342	Least-adapted genes
Ss	SSTP_0000532300.1	0.442043	0.345295	Least-adapted genes	GO:0015074, GO:0003676
Ss	SSTP_0001135600.1	0.44232	0.369176	Least-adapted genes
Ss	SSTP_0000074476.1	0.443155	0.310658	Least-adapted genes
Ss	SSTP_0000690200.1	0.443258	0.350823	Least-adapted genes	GO:0009058, GO:0016779
Ss	SSTP_0000081800.1	0.443705	0.31746	Least-adapted genes	GO:0016020, GO:0016021
Ss	SSTP_0000665900.1	0.44374	0.36173	Least-adapted genes	GO:0015074, GO:0003676, GO:0008270
Ss	SSTP_0001139400.1	0.443864	0.298651	Least-adapted genes
Ss	SSTP_0001102200.1	0.44402	0.353316	Least-adapted genes	GO:0016020, GO:0016021
Ss	SSTP_0000666000.1	0.444047	0.321569	Least-adapted genes
Ss	SSTP_0000808600.1	0.444128	0.28	Least-adapted genes	GO:0016020, GO:0016021
Ss	SSTP_0000141900.1	0.444238	0.33871	Least-adapted genes	GO:0043565, GO:0042025, GO:0003700, GO:0006355, GO:0008270, GO:0046872, GO:0005634, GO:0003677
Ss	SSTP_0000932500.1	0.444747	0.318594	Least-adapted genes	GO:0004190, GO:0015074, GO:0003676, GO:0006508

## Sheet: Sr
File S3. GeneIDs, Codon Adaptation Index (CAI) values, fractional GC content, and GO term accession number of the 2% of genes with the highest and lowest CAI values for each Strongyloides species and C. elegans
Species	Gene ID	CAI by genus-specific usage rule	GC	Description	GO term ID
Sr	SRAE_1000103200	0.831048	0.405303	Most-adapted genes
Sr	SRAE_2000459000	0.83025	0.320833	Most-adapted genes
Sr	SRAE_2000463500	0.829368	0.453947	Most-adapted genes
Sr	SRAE_X000050000b	0.825142	0.301405	Most-adapted genes
Sr	SRAE_1000338900	0.824224	0.382946	Most-adapted genes	GO:0003735, GO:0005840, GO:0006412
Sr	SRAE_2000138400	0.823375	0.37751	Most-adapted genes	GO:0003735, GO:0005840, GO:0006412
Sr	SRAE_2000115300	0.823194	0.369115	Most-adapted genes	GO:0046872
Sr	SRAE_2000249700	0.814778	0.3706	Most-adapted genes	GO:0005840
Sr	SRAE_X000086900	0.810471	0.284591	Most-adapted genes
Sr	SRAE_X000144300	0.803302	0.298539	Most-adapted genes	GO:0016491, GO:0055114, GO:0005737, GO:0008767, GO:0033692
Sr	SRAE_X000039300	0.803109	0.333333	Most-adapted genes	GO:0046872, GO:0016491, GO:0051287, GO:0055114, GO:0016616, GO:0000287, GO:0006099, GO:0004450, GO:0006102
Sr	SRAE_2000334300	0.801053	0.321705	Most-adapted genes	GO:0000062
Sr	SRAE_X000050000a	0.800917	0.304183	Most-adapted genes
Sr	SRAE_1000022300	0.800624	0.315737	Most-adapted genes	GO:0000166, GO:0005524
Sr	SRAE_2000018050	0.800465	0.39899	Most-adapted genes	GO:0003735, GO:0005840, GO:0006412
Sr	SRAE_X000110700	0.800279	0.35575	Most-adapted genes	GO:0000166, GO:0004365, GO:0006006, GO:0006096, GO:0016491, GO:0016620, GO:0050661, GO:0051287, GO:0055114
Sr	SRAE_X000202100	0.798382	0.310053	Most-adapted genes	GO:0005509, GO:0042335
Sr	SRAE_2000342700	0.797765	0.356589	Most-adapted genes
Sr	SRAE_2000079900	0.796853	0.348837	Most-adapted genes
Sr	SRAE_2000019000	0.794664	0.282787	Most-adapted genes
Sr	SRAE_X000164700	0.794581	0.319574	Most-adapted genes	GO:0016020, GO:0016021, GO:0018996
Sr	SRAE_2000503000	0.793418	0.268939	Most-adapted genes
Sr	SRAE_2000011900	0.792229	0.378205	Most-adapted genes	GO:0003677, GO:0005634, GO:0042025, GO:0000786, GO:0005694, GO:0046982
Sr	SRAE_1000346600	0.791364	0.400966	Most-adapted genes
Sr	SRAE_2000147800	0.789913	0.340996	Most-adapted genes	GO:0016787, GO:0006730, GO:0004013
Sr	SRAE_X000018400	0.789866	0.375	Most-adapted genes	GO:0003677, GO:0005634, GO:0042025, GO:0000786, GO:0005694, GO:0046982
Sr	SRAE_2000048450	0.789858	0.224044	Most-adapted genes
Sr	SRAE_1000058300	0.789789	0.499423	Most-adapted genes
Sr	SRAE_X000224800	0.789398	0.445833	Most-adapted genes	GO:0016020, GO:0016021, GO:0005581, GO:0042302
Sr	SRAE_1000198500	0.787028	0.367021	Most-adapted genes
Sr	SRAE_X000214200	0.786843	0.214815	Most-adapted genes	GO:0016021, GO:0016740, GO:0016020, GO:0005794, GO:0016757, GO:0006486, GO:0008417, GO:0032580, GO:0036065
Sr	SRAE_X000116000	0.785165	0.292465	Most-adapted genes
Sr	SRAE_2000437400	0.784153	0.516082	Most-adapted genes
Sr	SRAE_2000434700	0.783917	0.501096	Most-adapted genes	GO:0016020, GO:0016021, GO:0005581, GO:0042302
Sr	SRAE_2000439500	0.783766	0.506579	Most-adapted genes	GO:0016020, GO:0016021, GO:0005581, GO:0042302
Sr	SRAE_2000149000	0.783685	0.353211	Most-adapted genes	GO:0016787, GO:0006730, GO:0004013
Sr	SRAE_2000145200	0.783423	0.458781	Most-adapted genes	GO:0016020, GO:0016021, GO:0005581, GO:0042302, GO:0042338
Sr	SRAE_X000087200	0.782927	0.377018	Most-adapted genes	GO:0016020, GO:0016021, GO:0055085, GO:0005347, GO:0015867
Sr	SRAE_X000029700	0.78274	0.34245	Most-adapted genes	GO:0005882, GO:0016324
Sr	SRAE_X000214100	0.782731	0.325653	Most-adapted genes
Sr	SRAE_X000034300	0.782474	0.316913	Most-adapted genes
Sr	SRAE_1000332300	0.782216	0.318996	Most-adapted genes
Sr	SRAE_2000174400	0.782179	0.407895	Most-adapted genes	GO:0003735, GO:0005840, GO:0006412
Sr	SRAE_0000048100	0.782106	0.295171	Most-adapted genes	GO:0006508, GO:0008270, GO:0005576, GO:0004222, GO:0008237, GO:0018996
Sr	SRAE_2000126900	0.782069	0.498316	Most-adapted genes	GO:0005581, GO:0042302
Sr	SRAE_2000098100	0.781916	0.3257	Most-adapted genes	GO:0003735, GO:0005840, GO:0006412
Sr	SRAE_X000108600	0.781897	0.315193	Most-adapted genes	GO:0005615
Sr	SRAE_2000118800	0.781056	0.391026	Most-adapted genes	GO:0003677, GO:0005634, GO:0042025, GO:0000786, GO:0005694, GO:0046982
Sr	SRAE_1000159100	0.780557	0.303658	Most-adapted genes
Sr	SRAE_2000056800	0.780195	0.276119	Most-adapted genes
Sr	SRAE_X000119600	0.780151	0.340136	Most-adapted genes	GO:0016020, GO:0016021
Sr	SRAE_2000171500	0.779962	0.359428	Most-adapted genes	GO:0004190, GO:0006508, GO:0016787, GO:0005737, GO:0008233, GO:0005764, GO:0070265
Sr	SRAE_1000136500	0.779809	0.342723	Most-adapted genes	GO:0016020, GO:0055114, GO:0005739, GO:0005743, GO:0006122, GO:0008121, GO:0070469
Sr	SRAE_X000123500	0.779625	0.294486	Most-adapted genes
Sr	SRAE_X000225800	0.779448	0.234234	Most-adapted genes
Sr	SRAE_1000098100	0.778633	0.307108	Most-adapted genes
Sr	SRAE_2000507900	0.778124	0.236782	Most-adapted genes
Sr	SRAE_1000340700	0.777718	0.346561	Most-adapted genes	GO:0006811, GO:1902600, GO:0012501, GO:0042626, GO:0016471, GO:0043068
Sr	SRAE_2000475200	0.777706	0.35348	Most-adapted genes
Sr	SRAE_2000451700	0.777475	0.251656	Most-adapted genes	GO:0016020, GO:0016021
Sr	SRAE_0000042000	0.777259	0.360143	Most-adapted genes
Sr	SRAE_2000428600	0.776604	0.289116	Most-adapted genes
Sr	SRAE_1000315300	0.776554	0.374242	Most-adapted genes	GO:0016740, GO:0006099, GO:0004108, GO:0006101, GO:0046912
Sr	SRAE_X000104200	0.775759	0.35006	Most-adapted genes	GO:0030246, GO:0060102, GO:0016936
Sr	SRAE_X000177900	0.775652	0.283046	Most-adapted genes	GO:0016491, GO:0055114, GO:0006979, GO:0098869, GO:0004601, GO:0004602
Sr	SRAE_X000218200	0.774211	0.294309	Most-adapted genes
Sr	SRAE_2000001900	0.774022	0.341146	Most-adapted genes	GO:0003735, GO:0005840, GO:0006412
Sr	SRAE_2000379150	0.773918	0.211111	Most-adapted genes	GO:0016020, GO:0016021
Sr	SRAE_0000011100	0.773613	0.334507	Most-adapted genes	GO:0055085, GO:0005741, GO:0008308, GO:0015698, GO:0098656, GO:0005739, GO:1902017
Sr	SRAE_1000115300	0.773603	0.303658	Most-adapted genes
Sr	SRAE_2000027000	0.772894	0.365835	Most-adapted genes	GO:0003774, GO:0016459
Sr	SRAE_X000052800	0.772415	0.290667	Most-adapted genes	GO:0016020, GO:0016021, GO:0006629
Sr	SRAE_0000047800	0.772325	0.287958	Most-adapted genes	GO:0006508, GO:0004222
Sr	SRAE_2000476700	0.772109	0.337121	Most-adapted genes
Sr	SRAE_X000167200	0.772072	0.314465	Most-adapted genes
Sr	SRAE_1000279000	0.772065	0.355519	Most-adapted genes	GO:0003824
Sr	SRAE_1000074900	0.771956	0.405405	Most-adapted genes	GO:0003735, GO:0005840, GO:0006412
Sr	SRAE_X000217900	0.771677	0.31052	Most-adapted genes	GO:0016740, GO:0016746, GO:0001966, GO:0005874, GO:0006473, GO:0019799, GO:0042490, GO:0048666, GO:0070507, GO:0071929
Sr	SRAE_2000157400	0.77145	0.453291	Most-adapted genes	GO:0016020, GO:0016021, GO:0005581, GO:0042302
Sr	SRAE_2000506400	0.771183	0.34579	Most-adapted genes	GO:0009792, GO:0002119, GO:0048598, GO:0004867, GO:0010951, GO:0032504, GO:0005604, GO:0000902
Sr	SRAE_X000257300	0.771112	0.29819	Most-adapted genes	GO:0030246
Sr	SRAE_1000020900	0.770772	0.378168	Most-adapted genes	GO:0000166, GO:0004365, GO:0006006, GO:0006096, GO:0016491, GO:0016620, GO:0050661, GO:0051287, GO:0055114
Sr	SRAE_2000325000	0.770756	0.337984	Most-adapted genes	GO:0006412, GO:0003746, GO:0005853, GO:0006414
Sr	SRAE_2000046500	0.770517	0.239583	Most-adapted genes	GO:0005615
Sr	SRAE_1000099100	0.770321	0.306418	Most-adapted genes
Sr	SRAE_X000071300	0.77028	0.366228	Most-adapted genes	GO:0000166, GO:0005524, GO:0018991, GO:0040011, GO:0006936, GO:0003774, GO:0003779, GO:0016459, GO:0008307, GO:0051015, GO:0031672, GO:0005863, GO:0000146, GO:0005859, GO:0030241
Sr	SRAE_1000253500	0.769887	0.221505	Most-adapted genes	GO:0016020, GO:0016021
Sr	SRAE_1000287300	0.769249	0.326201	Most-adapted genes	GO:0005737, GO:0005829, GO:0051536, GO:0051539, GO:0003994, GO:0072350
Sr	SRAE_1000232100	0.769082	0.238845	Most-adapted genes
Sr	SRAE_2000277800	0.768775	0.311111	Most-adapted genes	GO:0003774, GO:0005874, GO:0005737, GO:0005856, GO:0007017, GO:0030286, GO:0005875
Sr	SRAE_X000096500	0.7686	0.328404	Most-adapted genes	GO:0000166, GO:0016491, GO:0055114, GO:0006520, GO:0016639
Sr	SRAE_X000031400	0.768238	0.342863	Most-adapted genes	GO:0005576, GO:0008061
Sr	SRAE_1000258200	0.768149	0.368333	Most-adapted genes
Sr	SRAE_X000106600	0.768061	0.241888	Most-adapted genes
Sr	SRAE_1000181300	0.767997	0.516204	Most-adapted genes
Sr	SRAE_2000476800	0.767934	0.318841	Most-adapted genes
Sr	SRAE_1000016400	0.767834	0.322942	Most-adapted genes	GO:0003824, GO:0030170, GO:0016829, GO:0019346
Sr	SRAE_1000170700	0.76758	0.306418	Most-adapted genes
Sr	SRAE_2000508300	0.767458	0.250575	Most-adapted genes
Sr	SRAE_X000135300	0.767365	0.45943	Most-adapted genes	GO:0016020, GO:0016021, GO:0005581, GO:0042302
Sr	SRAE_2000390400	0.766847	0.256566	Most-adapted genes
Sr	SRAE_1000276100	0.766784	0.374269	Most-adapted genes
Sr	SRAE_2000432000	0.766775	0.278132	Most-adapted genes	GO:0016491, GO:0055114
Sr	SRAE_X000165500	0.766671	0.381995	Most-adapted genes	GO:0003677, GO:0005634, GO:0000786, GO:0005694, GO:0046982
Sr	SRAE_X000085700	0.76662	0.233255	Most-adapted genes	GO:0016740, GO:0008168, GO:0032259, GO:0005515
Sr	SRAE_2000334600	0.766173	0.38175	Most-adapted genes	GO:0006811, GO:0000166, GO:0005524, GO:1902600, GO:0046933, GO:0046034, GO:0015986, GO:0005739, GO:0045261, GO:0055072, GO:0006754, GO:0032559, GO:0033212, GO:1903981
Sr	SRAE_2000231100	0.766115	0.265487	Most-adapted genes	GO:0004725, GO:0006470, GO:0016311, GO:0016787, GO:0016791, GO:0035335
Sr	SRAE_1000265900	0.765244	0.336667	Most-adapted genes	GO:0016020, GO:0016021
Sr	SRAE_X000052700	0.765202	0.289189	Most-adapted genes	GO:0016020, GO:0016021, GO:0006629
Sr	SRAE_2000397400	0.764618	0.371981	Most-adapted genes	GO:0003796
Sr	SRAE_2000084300	0.764456	0.284831	Most-adapted genes	GO:0016020, GO:0016021, GO:0005886, GO:0012501, GO:0000132, GO:0070986, GO:0043652, GO:1901076, GO:1903356, GO:0045184, GO:0009986, GO:0001891, GO:0001845, GO:0005044, GO:0030670, GO:0031260, GO:0031532, GO:0034620, GO:0042742, GO:0043654, GO:1902742, GO:1904747, GO:0005515
Sr	SRAE_2000431200	0.764229	0.280864	Most-adapted genes
Sr	SRAE_1000238800	0.764147	0.276995	Most-adapted genes
Sr	SRAE_1000233700	0.764017	0.325041	Most-adapted genes
Sr	SRAE_1000188900	0.764004	0.469747	Most-adapted genes	GO:0016020, GO:0016021, GO:0005581, GO:0042302
Sr	SRAE_1000051900	0.763578	0.327044	Most-adapted genes	GO:0045138, GO:0040015
Sr	SRAE_2000515500	0.763437	0.328394	Most-adapted genes
Sr	SRAE_1000356800	0.763399	0.243972	Most-adapted genes	GO:0003676, GO:0003723
Sr	SRAE_X000045800	0.763367	0.263889	Most-adapted genes	GO:0004867, GO:0010951
Sr	SRAE_X000100400	0.763303	0.303271	Most-adapted genes
Sr	SRAE_2000400600	0.762971	0.306122	Most-adapted genes
Sr	SRAE_0000046000	0.762934	0.283333	Most-adapted genes	GO:0006508, GO:0046872, GO:0008270, GO:0005576, GO:0016787, GO:0004222, GO:0008233, GO:0008237, GO:0018996
Sr	SRAE_2000349800	0.762684	0.340442	Most-adapted genes	GO:0006412, GO:0003746, GO:0006414, GO:0005515
Sr	SRAE_1000055000	0.762266	0.365152	Most-adapted genes
Sr	SRAE_X000003700	0.762189	0.454365	Most-adapted genes	GO:0016020, GO:0016021, GO:0005581, GO:0042302
Sr	SRAE_2000037100	0.761914	0.338308	Most-adapted genes	GO:0016020, GO:0016021, GO:0005743, GO:0005750, GO:0006122
Sr	SRAE_X000117900	0.761914	0.360269	Most-adapted genes	GO:0016491, GO:0055114, GO:0098869, GO:0016209, GO:0045454, GO:0051920
Sr	SRAE_2000415700	0.76182	0.29288	Most-adapted genes
Sr	SRAE_2000522500	0.761661	0.297619	Most-adapted genes
Sr	SRAE_0000529600	0.761573	0.180451	Most-adapted genes
Sr	SRAE_2000396600	0.761372	0.327586	Most-adapted genes	GO:0007275
Sr	SRAE_X000096000	0.761103	0.400335	Most-adapted genes
Sr	SRAE_X000020000	0.760754	0.324895	Most-adapted genes	GO:0009792, GO:0006508, GO:0040025, GO:0060102, GO:0040032, GO:0008234, GO:0035262, GO:0042395, GO:0005615, GO:0042718
Sr	SRAE_X000039200	0.760471	0.354545	Most-adapted genes	GO:0016020, GO:0016021, GO:0006457, GO:0016853, GO:0003755, GO:0000413
Sr	SRAE_1000020600	0.760184	0.406926	Most-adapted genes
Sr	SRAE_1000022400	0.760148	0.293983	Most-adapted genes	GO:0030246
Sr	SRAE_1000298500	0.760058	0.351892	Most-adapted genes	GO:0003824, GO:0006099, GO:0004333, GO:0006106, GO:0016829, GO:0045239
Sr	SRAE_X000121000	0.759856	0.344064	Most-adapted genes	GO:0006811, GO:0005524, GO:1902600, GO:0033180, GO:0046034
Sr	SRAE_2000054000	0.759745	0.264957	Most-adapted genes
Sr	SRAE_X000082900	0.759715	0.366992	Most-adapted genes	GO:0005524, GO:1902600, GO:0033180, GO:0046961, GO:0046034
Sr	SRAE_X000175600	0.759307	0.339631	Most-adapted genes	GO:0016020, GO:0016021, GO:0005515
Sr	SRAE_2000230600	0.759174	0.310284	Most-adapted genes	GO:0030246, GO:0005737, GO:0045177, GO:0051861
Sr	SRAE_X000198000	0.758946	0.349624	Most-adapted genes	GO:0005861
Sr	SRAE_1000087700	0.758878	0.421456	Most-adapted genes
Sr	SRAE_2000486900	0.758411	0.281829	Most-adapted genes
Sr	SRAE_X000206300	0.758336	0.188889	Most-adapted genes
Sr	SRAE_X000028200	0.758026	0.322917	Most-adapted genes	GO:0016020, GO:0016021, GO:0090502, GO:0004521, GO:0090305
Sr	SRAE_1000062100	0.75765	0.258503	Most-adapted genes
Sr	SRAE_2000466700	0.757462	0.357534	Most-adapted genes
Sr	SRAE_X000008400	0.757419	0.415625	Most-adapted genes	GO:0016020, GO:0016021, GO:0005581, GO:0042302
Sr	SRAE_1000260600	0.757241	0.350249	Most-adapted genes	GO:0000166, GO:0005524
Sr	SRAE_2000385900	0.757237	0.462867	Most-adapted genes	GO:0016020, GO:0016021, GO:0005581, GO:0042302
Sr	SRAE_2000100300	0.757158	0.400549	Most-adapted genes	GO:0003723, GO:0003735, GO:0005840, GO:0006412, GO:0015935
Sr	SRAE_1000005000	0.756974	0.222476	Most-adapted genes	GO:0005576, GO:0008061
Sr	SRAE_2000460900	0.756525	0.193548	Most-adapted genes	GO:0016020, GO:0016021
Sr	SRAE_X000120200	0.755508	0.304094	Most-adapted genes
Sr	SRAE_X000049700	0.755244	0.291173	Most-adapted genes
Sr	SRAE_X000036800	0.754981	0.276786	Most-adapted genes
Sr	SRAE_2000335200	0.754815	0.348765	Most-adapted genes	GO:0000166, GO:0016491, GO:0055114, GO:0006520, GO:0016639
Sr	SRAE_X000043600	0.754619	0.337662	Most-adapted genes
Sr	SRAE_2000270050	0.754549	0.271318	Most-adapted genes
Sr	SRAE_1000295400	0.754484	0.258915	Most-adapted genes	GO:0016740, GO:0000166, GO:0009116, GO:0046872, GO:0016757, GO:0005737, GO:0042802, GO:0006166, GO:0004422, GO:0032264, GO:0052657
Sr	SRAE_1000241200	0.75444	0.22963	Most-adapted genes
Sr	SRAE_X000229600	0.753941	0.285714	Most-adapted genes
Sr	SRAE_1000137000	0.753911	0.336851	Most-adapted genes	GO:0005576, GO:0008061
Sr	SRAE_2000323200	0.753827	0.404598	Most-adapted genes	GO:0008340, GO:0003723, GO:0003735, GO:0005840, GO:0006412, GO:0015935
Sr	SRAE_X000056600	0.753481	0.249513	Most-adapted genes	GO:0005576, GO:0006644, GO:0004623, GO:0050482
Sr	SRAE_2000371800	0.753439	0.312629	Most-adapted genes
Sr	SRAE_2000088300	0.753426	0.275831	Most-adapted genes	GO:0005604
Sr	SRAE_2000333700	0.753327	0.353801	Most-adapted genes	GO:0000166, GO:0004365, GO:0006006, GO:0006096, GO:0016491, GO:0016620, GO:0050661, GO:0051287, GO:0055114
Sr	SRAE_X000191500	0.753062	0.246982	Most-adapted genes	GO:0016020, GO:0016021, GO:0006508, GO:0046872, GO:0008270, GO:0016787, GO:0060465, GO:0004222, GO:0008233, GO:0008237, GO:0043050
Sr	SRAE_X000108700	0.753009	0.288288	Most-adapted genes	GO:0005615
Sr	SRAE_2000039300	0.752936	0.304709	Most-adapted genes	GO:0016740, GO:0000166, GO:0005524, GO:0016301, GO:0016310, GO:0003824, GO:0016772, GO:0004111, GO:0046314
Sr	SRAE_1000313900	0.752831	0.376828	Most-adapted genes	GO:0003924, GO:0005525, GO:0003746, GO:0006414, GO:0010629, GO:0050829
Sr	SRAE_1000094200	0.752472	0.295191	Most-adapted genes	GO:0016740, GO:0005524, GO:0016301, GO:0016310, GO:0006139, GO:0019205
Sr	SRAE_X000204800	0.752466	0.30839	Most-adapted genes
Sr	SRAE_X000227900	0.752337	0.307317	Most-adapted genes
Sr	SRAE_2000351700	0.752151	0.277108	Most-adapted genes	GO:0008289
Sr	SRAE_X000134100	0.752048	0.316826	Most-adapted genes	GO:0003676, GO:0003723
Sr	SRAE_2000002100	0.752025	0.22096	Most-adapted genes
Sr	SRAE_0000010500	0.751906	0.317273	Most-adapted genes	GO:0000166, GO:0005524, GO:0003774, GO:0003779, GO:0016459, GO:0051015
Sr	SRAE_2000256800	0.751816	0.397243	Most-adapted genes	GO:0000166, GO:0005524, GO:1902600, GO:0002119, GO:0008340, GO:0040024, GO:0030421, GO:0048598, GO:0097730, GO:0043050, GO:0046933, GO:0010629, GO:0046034, GO:0015986, GO:0050829, GO:0008406, GO:0005739, GO:0040039, GO:0045261, GO:0007617, GO:0005929, GO:0006754, GO:0019904
Sr	SRAE_1000011400	0.751758	0.30856	Most-adapted genes	GO:0040017
Sr	SRAE_2000503800	0.751189	0.215447	Most-adapted genes
Sr	SRAE_X000156600	0.751165	0.288815	Most-adapted genes	GO:0030246
Sr	SRAE_1000321800	0.751126	0.381551	Most-adapted genes	GO:0046872, GO:0016491, GO:0055114, GO:0006801, GO:0004784, GO:0019430
Sr	SRAE_X000077600	0.750987	0.222222	Most-adapted genes
Sr	SRAE_2000276800	0.75098	0.27572	Most-adapted genes
Sr	SRAE_X000162950	0.750875	0.270833	Most-adapted genes
Sr	SRAE_2000347300	0.750787	0.224582	Most-adapted genes
Sr	SRAE_1000350300	0.750655	0.296296	Most-adapted genes	GO:0046872, GO:0055114, GO:0009072, GO:0051213, GO:0003868, GO:0016701
Sr	SRAE_X000115200	0.750645	0.329749	Most-adapted genes	GO:0030246
Sr	SRAE_1000289500	0.750611	0.344086	Most-adapted genes	GO:0016020, GO:0016021, GO:0055085, GO:0005347, GO:0015867, GO:0022857, GO:0005743
Sr	SRAE_0000009700	0.750475	0.224806	Most-adapted genes	GO:0055114, GO:0016702, GO:0051213
Sr	SRAE_X000029000	0.750327	0.317238	Most-adapted genes	GO:0005524, GO:0006457, GO:0051082
Sr	SRAE_2000319600	0.750251	0.30719	Most-adapted genes	GO:0045454
Sr	SRAE_1000188400	0.749895	0.321888	Most-adapted genes	GO:0005634, GO:0016787, GO:0006508, GO:0008233, GO:0005737, GO:0000502, GO:0004175, GO:0004298, GO:0005839, GO:0051603, GO:0019773
Sr	SRAE_2000221200	0.749876	0.358663	Most-adapted genes	GO:0016301, GO:0016310, GO:0005525, GO:0006094, GO:0004611, GO:0004613, GO:0017076
Sr	SRAE_2000405900	0.749838	0.197531	Most-adapted genes
Sr	SRAE_1000014900	0.749834	0.258772	Most-adapted genes	GO:0003676
Sr	SRAE_2000399200	0.749537	0.462046	Most-adapted genes	GO:0016020, GO:0016021, GO:0005581, GO:0042302
Sr	SRAE_0000031400	0.749386	0.347222	Most-adapted genes	GO:0006412, GO:0003746, GO:0005853, GO:0006414
Sr	SRAE_2000512600	0.749257	0.318182	Most-adapted genes	GO:0007229
Sr	SRAE_2000128000	0.749199	0.231293	Most-adapted genes
Sr	SRAE_1000268100	0.749176	0.519126	Most-adapted genes	GO:0016020, GO:0016021, GO:0005581, GO:0042302
Sr	SRAE_1000107800	0.749058	0.237288	Most-adapted genes
Sr	SRAE_2000475100	0.748867	0.392781	Most-adapted genes	GO:0005840, GO:0042254
Sr	SRAE_1000259100	0.748629	0.293869	Most-adapted genes	GO:0006811, GO:1902600, GO:0046961, GO:0000221, GO:0005515
Sr	SRAE_X000059900	0.748596	0.249084	Most-adapted genes
Sr	SRAE_X000137200	0.748543	0.269949	Most-adapted genes	GO:0016020, GO:0016021, GO:0006508, GO:0004222, GO:0008237
Sr	SRAE_X000035700	0.748342	0.32444	Most-adapted genes	GO:0000166, GO:0005524, GO:0006936, GO:0003774, GO:0003779, GO:0016459, GO:0008307, GO:0043050, GO:0051015, GO:0005863
Sr	SRAE_0000003400	0.748338	0.258915	Most-adapted genes
Sr	SRAE_2000068800	0.748212	0.218137	Most-adapted genes
Sr	SRAE_2000504350	0.748037	0.234043	Most-adapted genes	GO:0016020, GO:0016021, GO:1902600, GO:0055114, GO:0020037, GO:0022900, GO:0004129, GO:0009060
Sr	SRAE_X000130900	0.747984	0.324074	Most-adapted genes
Sr	SRAE_X000139100	0.747968	0.333333	Most-adapted genes	GO:0005615
Sr	SRAE_X000000500	0.74779	0.329588	Most-adapted genes	GO:0007264, GO:0043547, GO:0005737, GO:0050790, GO:0015031, GO:0005096, GO:0005092, GO:0005093
Sr	SRAE_X000186400	0.747773	0.34346	Most-adapted genes	GO:0016740, GO:0000166, GO:0005524, GO:0046872, GO:0004478, GO:0006556, GO:0006730
Sr	SRAE_X000032500	0.747631	0.305128	Most-adapted genes	GO:0016020, GO:0016021
Sr	SRAE_X000097500	0.747606	0.290404	Most-adapted genes	GO:0016020, GO:0016021, GO:0005509, GO:0005515
Sr	SRAE_X000024100	0.747439	0.235088	Most-adapted genes
Sr	SRAE_2000254300	0.747305	0.367123	Most-adapted genes	GO:0006096, GO:0003824, GO:0016829, GO:0042802, GO:0004332
Sr	SRAE_2000175400	0.747295	0.277477	Most-adapted genes
Sr	SRAE_X000235600	0.747241	0.202703	Most-adapted genes
Sr	SRAE_1000243600	0.747141	0.437098	Most-adapted genes	GO:0016020, GO:0016021, GO:0005581, GO:0042302
Sr	SRAE_2000522000	0.747093	0.313474	Most-adapted genes
Sr	SRAE_1000148400	0.747069	0.284553	Most-adapted genes
Sr	SRAE_1000016500	0.747064	0.255639	Most-adapted genes
Sr	SRAE_1000322900	0.746922	0.30807	Most-adapted genes	GO:0006508, GO:0046872, GO:0016787, GO:0008237, GO:0016805
Sr	SRAE_X000101200	0.746582	0.251471	Most-adapted genes
Sr	SRAE_X000149900	0.746167	0.353201	Most-adapted genes
Sr	SRAE_2000465600	0.746148	0.236467	Most-adapted genes
Sr	SRAE_X000111600	0.746137	0.316103	Most-adapted genes	GO:0016740, GO:0016491, GO:0055114, GO:0003824, GO:0009058, GO:0004312, GO:0016788, GO:0031177
Sr	SRAE_2000355000	0.746027	0.329897	Most-adapted genes
Sr	SRAE_X000058200	0.745911	0.269565	Most-adapted genes
Sr	SRAE_0000044800	0.745661	0.28538	Most-adapted genes	GO:0005576
Sr	SRAE_X000230000	0.745636	0.234007	Most-adapted genes	GO:0005509
Sr	SRAE_0000039300	0.745215	0.404309	Most-adapted genes	GO:0003723, GO:0003735, GO:0005840, GO:0006412, GO:0019843
Sr	SRAE_X000173600	0.744944	0.202279	Most-adapted genes
Sr	SRAE_1000065500	0.744473	0.277901	Most-adapted genes	GO:0008168
Sr	SRAE_2000085500	0.74432	0.369322	Most-adapted genes	GO:0005524, GO:0009792, GO:0006457, GO:0002119, GO:0007005, GO:0008134, GO:0005739, GO:0034514, GO:0042026
Sr	SRAE_X000080400	0.744161	0.284627	Most-adapted genes	GO:0006629
Sr	SRAE_X000257400	0.74382	0.255556	Most-adapted genes
Sr	SRAE_X000209900	0.743818	0.333333	Most-adapted genes	GO:0006811, GO:1902600, GO:0034220, GO:0033180, GO:0046961
Sr	SRAE_1000090500	0.74378	0.260332	Most-adapted genes
Sr	SRAE_1000181200	0.743576	0.358818	Most-adapted genes	GO:0016020, GO:0016021, GO:0006811, GO:0006813, GO:0000166, GO:0005524, GO:0046872, GO:0000003, GO:0006937, GO:0006814, GO:0001508, GO:0005391, GO:0008556, GO:0010248, GO:0042391, GO:0071805
Sr	SRAE_X000238800	0.743417	0.258427	Most-adapted genes
Sr	SRAE_2000173300	0.743307	0.366228	Most-adapted genes	GO:0005509
Sr	SRAE_2000514800	0.743278	0.327891	Most-adapted genes
Sr	SRAE_2000067400	0.191044	0.565401	Least-adapted genes
Sr	SRAE_0000075600	0.221636	0.341463	Least-adapted genes
Sr	SRAE_2000155100	0.236863	0.490741	Least-adapted genes
Sr	SRAE_0000066600	0.250852	0.469136	Least-adapted genes	GO:0016020, GO:0016021
Sr	SRAE_0000068233	0.254173	0.457516	Least-adapted genes
Sr	SRAE_0000067900	0.254876	0.464912	Least-adapted genes
Sr	SRAE_2000060800	0.259438	0.45122	Least-adapted genes	GO:0016020, GO:0016021
Sr	SRAE_2000272000	0.279171	0.53869	Least-adapted genes
Sr	SRAE_0000065200	0.281053	0.478632	Least-adapted genes
Sr	SRAE_0000065300	0.284874	0.513514	Least-adapted genes
Sr	SRAE_0000081800	0.285491	0.424419	Least-adapted genes
Sr	SRAE_0000068000	0.290908	0.431624	Least-adapted genes
Sr	SRAE_X000225600	0.295164	0.430699	Least-adapted genes
Sr	SRAE_0000079400	0.297271	0.246269	Least-adapted genes
Sr	SRAE_0000059000	0.297424	0.448598	Least-adapted genes
Sr	SRAE_0000072200	0.299414	0.435216	Least-adapted genes
Sr	SRAE_X000233000	0.301855	0.403341	Least-adapted genes	GO:0003676, GO:0008270
Sr	SRAE_0000071500	0.303232	0.467213	Least-adapted genes
Sr	SRAE_0000048700	0.310513	0.430894	Least-adapted genes
Sr	SRAE_0000082200	0.310885	0.3874	Least-adapted genes
Sr	SRAE_0000079000	0.315818	0.361017	Least-adapted genes	GO:0003676, GO:0015074
Sr	SRAE_0000075900	0.317386	0.284753	Least-adapted genes
Sr	SRAE_X000180900	0.318627	0.439863	Least-adapted genes
Sr	SRAE_0000068266	0.319671	0.457875	Least-adapted genes
Sr	SRAE_2000385800	0.322852	0.445464	Least-adapted genes
Sr	SRAE_0000062800	0.323702	0.43619	Least-adapted genes
Sr	SRAE_0000080700	0.324197	0.274725	Least-adapted genes
Sr	SRAE_X000233100	0.324509	0.389831	Least-adapted genes
Sr	SRAE_0000047100	0.324939	0.460784	Least-adapted genes
Sr	SRAE_X000051400	0.326355	0.462025	Least-adapted genes
Sr	SRAE_X000218700	0.328642	0.443503	Least-adapted genes	GO:0016020, GO:0016021
Sr	SRAE_2000498400	0.330606	0.43599	Least-adapted genes
Sr	SRAE_0000078200	0.332965	0.321078	Least-adapted genes	GO:0003676, GO:0003964, GO:0006278, GO:0015074
Sr	SRAE_X000179900	0.333404	0.410448	Least-adapted genes
Sr	SRAE_0000054400	0.334035	0.405685	Least-adapted genes
Sr	SRAE_2000173800	0.334247	0.366197	Least-adapted genes
Sr	SRAE_0000072700	0.33475	0.441767	Least-adapted genes
Sr	SRAE_0000068100	0.33578	0.398963	Least-adapted genes	GO:0003964, GO:0006278
Sr	SRAE_0000077800	0.336129	0.293578	Least-adapted genes
Sr	SRAE_0000065500	0.33684	0.436293	Least-adapted genes
Sr	SRAE_0000046800	0.339541	0.377996	Least-adapted genes	GO:0003964, GO:0006278
Sr	SRAE_0000063200	0.3402	0.431718	Least-adapted genes
Sr	SRAE_0000068200	0.34023	0.41369	Least-adapted genes
Sr	SRAE_X000232700	0.344203	0.371429	Least-adapted genes	GO:0003676, GO:0015074
Sr	SRAE_0000062200	0.344281	0.400932	Least-adapted genes
Sr	SRAE_2000315100	0.344292	0.539617	Least-adapted genes
Sr	SRAE_0000061500	0.344881	0.392655	Least-adapted genes
Sr	SRAE_0000082100	0.345257	0.250821	Least-adapted genes	GO:0006508, GO:0004252, GO:0008236, GO:0070008
Sr	SRAE_X000009600	0.345469	0.427759	Least-adapted genes
Sr	SRAE_0000063100	0.345997	0.409449	Least-adapted genes
Sr	SRAE_0000052900	0.349729	0.420635	Least-adapted genes	GO:0016020, GO:0016021
Sr	SRAE_0000063400	0.350197	0.366528	Least-adapted genes
Sr	SRAE_2000257900	0.350279	0.546495	Least-adapted genes
Sr	SRAE_1000145850	0.355207	0.436782	Least-adapted genes
Sr	SRAE_0000073700	0.356398	0.265587	Least-adapted genes	GO:0003676, GO:0004190, GO:0006508, GO:0015074, GO:0008270
Sr	SRAE_0000068900	0.35763	0.420794	Least-adapted genes	GO:0003676, GO:0003964, GO:0004190, GO:0006278, GO:0006508, GO:0015074, GO:0003677
Sr	SRAE_X000240100	0.358085	0.419788	Least-adapted genes	GO:0003676, GO:0003964, GO:0006278, GO:0015074, GO:0003677
Sr	SRAE_X000104900	0.358926	0.415789	Least-adapted genes
Sr	SRAE_X000200500	0.360105	0.364597	Least-adapted genes	GO:0016020, GO:0016021, GO:0003676, GO:0003964, GO:0006278, GO:0015074
Sr	SRAE_0000063000	0.360799	0.396947	Least-adapted genes	GO:0003676
Sr	SRAE_0000058400	0.362432	0.391304	Least-adapted genes
Sr	SRAE_X000199300	0.363432	0.416232	Least-adapted genes	GO:0003676, GO:0003964, GO:0004190, GO:0006278, GO:0006508, GO:0015074, GO:0003677
Sr	SRAE_0000064600	0.364397	0.389558	Least-adapted genes
Sr	SRAE_0000051500	0.365725	0.369048	Least-adapted genes	GO:0003964, GO:0006278
Sr	SRAE_X000101400	0.366124	0.407843	Least-adapted genes
Sr	SRAE_0000054700	0.366782	0.383178	Least-adapted genes
Sr	SRAE_0000047000	0.370459	0.371476	Least-adapted genes	GO:0003676
Sr	SRAE_2000421900	0.372413	0.349206	Least-adapted genes
Sr	SRAE_X000132300	0.37356	0.399093	Least-adapted genes
Sr	SRAE_2000342600	0.373709	0.515593	Least-adapted genes
Sr	SRAE_1000220700	0.373902	0.436472	Least-adapted genes
Sr	SRAE_2000364900	0.37795	0.337778	Least-adapted genes
Sr	SRAE_0000052200	0.378537	0.410617	Least-adapted genes	GO:0003676, GO:0015074, GO:0003677
Sr	SRAE_X000233800	0.378655	0.370184	Least-adapted genes	GO:0003964, GO:0006278
Sr	SRAE_X000168650	0.379208	0.315412	Least-adapted genes
Sr	SRAE_X000199150	0.379804	0.373984	Least-adapted genes
Sr	SRAE_0000068300	0.380349	0.369712	Least-adapted genes	GO:0003964, GO:0006278
Sr	SRAE_X000212400	0.381488	0.414931	Least-adapted genes
Sr	SRAE_X000169000	0.381613	0.421429	Least-adapted genes
Sr	SRAE_X000237000	0.3819	0.407407	Least-adapted genes
Sr	SRAE_X000180400	0.382418	0.358396	Least-adapted genes	GO:0016787, GO:0004386
Sr	SRAE_X000140600	0.383814	0.374741	Least-adapted genes
Sr	SRAE_1000198400	0.385243	0.386667	Least-adapted genes
Sr	SRAE_X000232900	0.385415	0.412698	Least-adapted genes	GO:0016020, GO:0016021
Sr	SRAE_X000233400	0.386087	0.403361	Least-adapted genes
Sr	SRAE_X000232400	0.386161	0.386768	Least-adapted genes
Sr	SRAE_0000064700	0.386173	0.420455	Least-adapted genes
Sr	SRAE_1000193900	0.387371	0.450549	Least-adapted genes
Sr	SRAE_2000156400	0.3877	0.460243	Least-adapted genes
Sr	SRAE_1000224700	0.387809	0.37037	Least-adapted genes
Sr	SRAE_1000218000	0.388958	0.528455	Least-adapted genes
Sr	SRAE_X000240200	0.389602	0.416667	Least-adapted genes
Sr	SRAE_X000132400	0.390733	0.362069	Least-adapted genes	GO:0016740, GO:0008168, GO:0032259
Sr	SRAE_0000055100	0.391318	0.421053	Least-adapted genes
Sr	SRAE_2000266900	0.391445	0.368973	Least-adapted genes
Sr	SRAE_1000335700	0.392078	0.412316	Least-adapted genes	GO:0043005, GO:0044297
Sr	SRAE_2000242200	0.3925	0.429705	Least-adapted genes
Sr	SRAE_0000081700	0.393162	0.25656	Least-adapted genes
Sr	SRAE_X000232500	0.396934	0.414673	Least-adapted genes
Sr	SRAE_X000112000	0.397085	0.418848	Least-adapted genes
Sr	SRAE_0000064500	0.398444	0.382044	Least-adapted genes
Sr	SRAE_0000072800	0.398922	0.381559	Least-adapted genes	GO:0003676, GO:0004190, GO:0006508, GO:0015074, GO:0008270
Sr	SRAE_0000074350	0.399518	0.261111	Least-adapted genes
Sr	SRAE_X000237200	0.39988	0.348148	Least-adapted genes
Sr	SRAE_1000210200	0.401788	0.500624	Least-adapted genes
Sr	SRAE_0000049600	0.401982	0.434524	Least-adapted genes	GO:0003676, GO:0008270
Sr	SRAE_0000052100	0.402823	0.420833	Least-adapted genes
Sr	SRAE_0000055300	0.403092	0.357062	Least-adapted genes
Sr	SRAE_0000049700	0.403602	0.393871	Least-adapted genes	GO:0003676
Sr	SRAE_X000231600	0.403807	0.387283	Least-adapted genes
Sr	SRAE_0000071800	0.40381	0.333333	Least-adapted genes
Sr	SRAE_X000233500	0.404787	0.344937	Least-adapted genes	GO:0003964, GO:0006278
Sr	SRAE_X000232600	0.404799	0.341375	Least-adapted genes	GO:0003964, GO:0006278
Sr	SRAE_2000385600	0.40519	0.464407	Least-adapted genes
Sr	SRAE_0000067850	0.405702	0.394667	Least-adapted genes
Sr	SRAE_X000130700	0.406438	0.395062	Least-adapted genes
Sr	SRAE_0000072000	0.406741	0.357013	Least-adapted genes	GO:0003676, GO:0003964, GO:0006278
Sr	SRAE_X000233700	0.407992	0.346561	Least-adapted genes
Sr	SRAE_0000075000	0.40861	0.413255	Least-adapted genes
Sr	SRAE_X000141300	0.409277	0.411458	Least-adapted genes
Sr	SRAE_2000117100	0.409535	0.330882	Least-adapted genes	GO:0016020, GO:0016021, GO:0035307, GO:0071595
Sr	SRAE_0000058000	0.409967	0.350219	Least-adapted genes	GO:0003964, GO:0006278
Sr	SRAE_0000049800	0.410293	0.370647	Least-adapted genes
Sr	SRAE_0000047200	0.410306	0.386667	Least-adapted genes	GO:0003676, GO:0008270
Sr	SRAE_0000049500	0.410705	0.399151	Least-adapted genes
Sr	SRAE_X000180500	0.410934	0.416021	Least-adapted genes
Sr	SRAE_0000052400	0.41162	0.371829	Least-adapted genes
Sr	SRAE_X000163900	0.41187	0.396226	Least-adapted genes
Sr	SRAE_0000057300	0.412439	0.347619	Least-adapted genes
Sr	SRAE_0000054200	0.412639	0.358333	Least-adapted genes
Sr	SRAE_0000059500	0.412921	0.330113	Least-adapted genes
Sr	SRAE_2000202100	0.412938	0.362319	Least-adapted genes	GO:0016020, GO:0016021
Sr	SRAE_X000200400	0.413262	0.362441	Least-adapted genes
Sr	SRAE_1000210500	0.41416	0.487455	Least-adapted genes
Sr	SRAE_X000140800	0.414805	0.3531	Least-adapted genes	GO:0005524, GO:0016787, GO:0004386
Sr	SRAE_X000141000	0.416083	0.315673	Least-adapted genes	GO:0003676, GO:0015074
Sr	SRAE_0000060200	0.416444	0.363768	Least-adapted genes
Sr	SRAE_X000141200	0.41768	0.317003	Least-adapted genes
Sr	SRAE_2000416100	0.417773	0.377104	Least-adapted genes
Sr	SRAE_2000020700	0.418059	0.373964	Least-adapted genes	GO:0000166, GO:0007186, GO:0007165, GO:0005737, GO:0030424, GO:0043005, GO:0014057, GO:0043025, GO:0002119, GO:0003924, GO:0005525, GO:0043051, GO:0050830, GO:0007631, GO:0019001, GO:0031683, GO:0007635, GO:0048680, GO:0040017, GO:0050920, GO:0046662, GO:0007210, GO:2000292, GO:1902474, GO:0001664, GO:0002253, GO:0007212, GO:0031234, GO:0042307, GO:1902074
Sr	SRAE_0000059100	0.418831	0.421053	Least-adapted genes
Sr	SRAE_X000237300	0.419341	0.303772	Least-adapted genes	GO:0003964, GO:0006278
Sr	SRAE_0000059400	0.420156	0.340417	Least-adapted genes	GO:0003676, GO:0003964, GO:0004190, GO:0006278, GO:0006508, GO:0008270
Sr	SRAE_0000062600	0.420268	0.342148	Least-adapted genes	GO:0003676, GO:0003964, GO:0006278, GO:0015074, GO:0004523, GO:0090502
Sr	SRAE_0000065400	0.420604	0.406863	Least-adapted genes
Sr	SRAE_X000199700	0.421176	0.353355	Least-adapted genes	GO:0003676, GO:0015074
Sr	SRAE_0000058900	0.421949	0.333333	Least-adapted genes
Sr	SRAE_2000398300	0.422109	0.386179	Least-adapted genes
Sr	SRAE_0000049400	0.422238	0.352113	Least-adapted genes
Sr	SRAE_X000146300	0.422692	0.404558	Least-adapted genes
Sr	SRAE_X000191400	0.422928	0.310078	Least-adapted genes	GO:0006508, GO:0004197
Sr	SRAE_2000127600	0.423805	0.343669	Least-adapted genes	GO:0003676, GO:0003964, GO:0004190, GO:0006278, GO:0006508, GO:0015074, GO:0008270
Sr	SRAE_0000054800	0.425855	0.357843	Least-adapted genes
Sr	SRAE_1000345200	0.425912	0.402597	Least-adapted genes
Sr	SRAE_0000062400	0.426018	0.337798	Least-adapted genes
Sr	SRAE_2000416000	0.426305	0.335256	Least-adapted genes	GO:0003676, GO:0003964, GO:0004190, GO:0006278, GO:0006508, GO:0008270
Sr	SRAE_0000060300	0.426612	0.356902	Least-adapted genes
Sr	SRAE_2000166000	0.427615	0.277108	Least-adapted genes
Sr	SRAE_0000058800	0.427769	0.321063	Least-adapted genes
Sr	SRAE_0000072100	0.427949	0.382066	Least-adapted genes
Sr	SRAE_1000197400	0.427985	0.330357	Least-adapted genes	GO:0003676, GO:0003964, GO:0006278, GO:0015074, GO:0008270
Sr	SRAE_1000170500	0.428119	0.37037	Least-adapted genes
Sr	SRAE_0000082300	0.428412	0.376038	Least-adapted genes
Sr	SRAE_0000068400	0.4286	0.355556	Least-adapted genes
Sr	SRAE_X000233900	0.4286	0.355556	Least-adapted genes
Sr	SRAE_X000199900	0.428881	0.347178	Least-adapted genes	GO:0003676, GO:0008270
Sr	SRAE_0000060700	0.429979	0.28972	Least-adapted genes	GO:0003964, GO:0006278
Sr	SRAE_1000178700	0.430414	0.38806	Least-adapted genes	GO:0016020, GO:0007186, GO:0007165, GO:0005886, GO:0003924, GO:0005834, GO:0050909
Sr	SRAE_X000107100	0.43084	0.336612	Least-adapted genes	GO:0016787, GO:0004386
Sr	SRAE_2000110700	0.431458	0.362745	Least-adapted genes
Sr	SRAE_0000063500	0.431564	0.355705	Least-adapted genes
Sr	SRAE_X000233600	0.432328	0.348898	Least-adapted genes
Sr	SRAE_2000221300	0.43382	0.357798	Least-adapted genes
Sr	SRAE_X000244200	0.433857	0.377778	Least-adapted genes
Sr	SRAE_X000234000	0.434025	0.360976	Least-adapted genes
Sr	SRAE_0000070600	0.435582	0.369902	Least-adapted genes
Sr	SRAE_0000060500	0.435713	0.359404	Least-adapted genes
Sr	SRAE_2000314800	0.435722	0.385802	Least-adapted genes
Sr	SRAE_0000066050	0.435809	0.275862	Least-adapted genes
Sr	SRAE_2000256450	0.435827	0.282946	Least-adapted genes
Sr	SRAE_0000048400	0.435872	0.359722	Least-adapted genes
Sr	SRAE_1000348700	0.43597	0.388235	Least-adapted genes
Sr	SRAE_X000199800	0.436302	0.333333	Least-adapted genes	GO:0003676
Sr	SRAE_0000068500	0.436871	0.35935	Least-adapted genes
Sr	SRAE_1000019800	0.437141	0.31401	Least-adapted genes
Sr	SRAE_2000366600	0.43743	0.38239	Least-adapted genes	GO:0003676
Sr	SRAE_X000236400	0.437824	0.355497	Least-adapted genes	GO:0003676, GO:0003964, GO:0006278, GO:0008270
Sr	SRAE_X000188900	0.437979	0.268657	Least-adapted genes	GO:0016020, GO:0016021
Sr	SRAE_X000141100	0.438153	0.31619	Least-adapted genes
Sr	SRAE_1000305300	0.439405	0.301418	Least-adapted genes
Sr	SRAE_0000058100	0.439549	0.335185	Least-adapted genes	GO:0003676, GO:0015074
Sr	SRAE_1000335500	0.441455	0.351648	Least-adapted genes	GO:0000166, GO:0007186, GO:0007165, GO:0003924, GO:0005525, GO:0019001, GO:0031683, GO:0090038, GO:1900195, GO:2000114, GO:2000292
Sr	SRAE_X000182100	0.44166	0.353881	Least-adapted genes
Sr	SRAE_1000232700	0.441813	0.330623	Least-adapted genes	GO:0005737, GO:0030424, GO:0050807, GO:0043025, GO:0048471, GO:0030516
Sr	SRAE_X000226000	0.44234	0.361111	Least-adapted genes	GO:0016740, GO:0008168, GO:0032259
Sr	SRAE_0000071400	0.442451	0.238095	Least-adapted genes
Sr	SRAE_0000076500	0.442858	0.300567	Least-adapted genes
Sr	SRAE_X000208700	0.443997	0.352	Least-adapted genes
Sr	SRAE_X000037800	0.44408	0.351648	Least-adapted genes
Sr	SRAE_X000104800	0.444281	0.420765	Least-adapted genes
Sr	SRAE_0000064200	0.444286	0.326241	Least-adapted genes
Sr	SRAE_X000013800	0.444774	0.273408	Least-adapted genes	GO:0016020, GO:0016021
Sr	SRAE_1000232400	0.4451	0.349908	Least-adapted genes	GO:0016020, GO:0016021
Sr	SRAE_X000221600	0.446035	0.313043	Least-adapted genes
Sr	SRAE_2000108400	0.446605	0.312312	Least-adapted genes	GO:0016020, GO:0016021
Sr	SRAE_0000054100	0.447076	0.298851	Least-adapted genes
Sr	SRAE_0000076300	0.44761	0.415625	Least-adapted genes
Sr	SRAE_1000161900	0.447653	0.331217	Least-adapted genes	GO:0042025, GO:0006357, GO:0000079, GO:0016538
Sr	SRAE_1000261800	0.447946	0.305419	Least-adapted genes	GO:0016301, GO:0016310, GO:0004550, GO:0006165
Sr	SRAE_0000061900	0.447965	0.305344	Least-adapted genes
Sr	SRAE_0000059300	0.448207	0.335897	Least-adapted genes	GO:0003676, GO:0015074
Sr	SRAE_1000308300	0.448456	0.35942	Least-adapted genes
Sr	SRAE_0000064100	0.449075	0.324029	Least-adapted genes	GO:0003676, GO:0003964, GO:0004190, GO:0006278, GO:0006508, GO:0015074
Sr	SRAE_0000066700	0.449145	0.375702	Least-adapted genes	GO:0003676, GO:0003964, GO:0004190, GO:0006278, GO:0006508, GO:0015074, GO:0003677
Sr	SRAE_0000073800	0.449534	0.291188	Least-adapted genes
Sr	SRAE_0000052000	0.449535	0.337273	Least-adapted genes	GO:0003676, GO:0003964, GO:0006278, GO:0015074
Sr	SRAE_0000049300	0.449966	0.381333	Least-adapted genes
Sr	SRAE_X000140900	0.450155	0.333333	Least-adapted genes	GO:0003676, GO:0004523, GO:0090502
Sr	SRAE_0000082800	0.450259	0.292264	Least-adapted genes
Sr	SRAE_0000046300	0.450307	0.327168	Least-adapted genes	GO:0003676, GO:0003964, GO:0006278, GO:0015074
Sr	SRAE_X000237100	0.450652	0.388889	Least-adapted genes
Sr	SRAE_2000095300	0.450899	0.347901	Least-adapted genes
Sr	SRAE_2000048600	0.451279	0.36	Least-adapted genes	GO:0003676
Sr	SRAE_0000050800	0.451523	0.336449	Least-adapted genes
Sr	SRAE_2000202700	0.451873	0.229437	Least-adapted genes
Sr	SRAE_1000259350	0.452172	0.328205	Least-adapted genes
Sr	SRAE_X000218900	0.452886	0.344086	Least-adapted genes
Sr	SRAE_0000059200	0.452937	0.303835	Least-adapted genes	GO:0005524, GO:0003676, GO:0016787, GO:0004386
Sr	SRAE_2000177700	0.453429	0.352642	Least-adapted genes	GO:0003677, GO:0006352
Sr	SRAE_0000053700	0.454441	0.35124	Least-adapted genes	GO:0003964, GO:0006278
Sr	SRAE_2000508500	0.455999	0.399202	Least-adapted genes
Sr	SRAE_X000236500	0.456051	0.383929	Least-adapted genes	GO:0003676
Sr	SRAE_X000167800	0.456191	0.338164	Least-adapted genes
Sr	SRAE_X000199600	0.456296	0.333333	Least-adapted genes
Sr	SRAE_2000296700	0.457214	0.377964	Least-adapted genes	GO:0003677, GO:0006355
Sr	SRAE_0000055200	0.457628	0.344218	Least-adapted genes
Sr	SRAE_2000116800	0.457749	0.321637	Least-adapted genes	GO:0016020, GO:0016021
Sr	SRAE_1000194000	0.458047	0.438596	Least-adapted genes
Sr	SRAE_0000048800	0.45814	0.3875	Least-adapted genes
Sr	SRAE_0000051450	0.458148	0.352025	Least-adapted genes
Sr	SRAE_X000196100	0.458217	0.32	Least-adapted genes
Sr	SRAE_0000060900	0.458595	0.291667	Least-adapted genes
Sr	SRAE_1000173600	0.458898	0.349138	Least-adapted genes	GO:0016020, GO:0016021, GO:0003677, GO:0005634, GO:0000786, GO:0005694, GO:0046982
Sr	SRAE_1000347200	0.459244	0.318519	Least-adapted genes	GO:0016020, GO:0016021
Sr	SRAE_2000139650	0.459374	0.292308	Least-adapted genes	GO:0046982
Sr	SRAE_1000330900	0.459631	0.352352	Least-adapted genes
Sr	SRAE_0000051900	0.461001	0.338346	Least-adapted genes
Sr	SRAE_X000236300	0.46133	0.362288	Least-adapted genes	GO:0003676, GO:0015074
Sr	SRAE_0000053500	0.461345	0.363333	Least-adapted genes	GO:0016020, GO:0016021

## Sheet: Sp
File S3. GeneIDs, Codon Adaptation Index (CAI) values, fractional GC content, and GO term accession number of the 2% of genes with the highest and lowest CAI values for each Strongyloides species and C. elegans
Species	Gene ID	CAI by genus-specific usage rule	GC	Description	GO term ID
Sp	SPAL_0001065900.1	0.869062	0.26087	Most-adapted genes
Sp	SPAL_0000115300.1	0.822302	0.28125	Most-adapted genes
Sp	SPAL_0000936000.1	0.816239	0.527594	Most-adapted genes
Sp	SPAL_0000049500.1	0.801549	0.505051	Most-adapted genes
Sp	SPAL_0001133700.1	0.795943	0.321839	Most-adapted genes
Sp	SPAL_0001662800.1	0.793418	0.373333	Most-adapted genes	GO:0008061, GO:0005576
Sp	SPAL_0001051550.1	0.789183	0.202186	Most-adapted genes
Sp	SPAL_0000406000.1	0.783306	0.353211	Most-adapted genes	GO:0009253, GO:0003796, GO:0016998
Sp	SPAL_0000878100.1	0.781264	0.248996	Most-adapted genes
Sp	SPAL_0001049800.1	0.778773	0.293173	Most-adapted genes	GO:0008289
Sp	SPAL_0001418900.1	0.774665	0.351449	Most-adapted genes
Sp	SPAL_0000405900.1	0.767774	0.360856	Most-adapted genes	GO:0009253, GO:0003796, GO:0016998
Sp	SPAL_0001302600.1	0.76661	0.461905	Most-adapted genes
Sp	SPAL_0000207500.1	0.763758	0.322296	Most-adapted genes	GO:0030246
Sp	SPAL_0000504900.1	0.763132	0.320346	Most-adapted genes
Sp	SPAL_0000834300.1	0.760279	0.291667	Most-adapted genes
Sp	SPAL_0000596400.1	0.758433	0.27957	Most-adapted genes
Sp	SPAL_0001392100.1	0.758189	0.336957	Most-adapted genes	GO:0003755, GO:0016020, GO:0016021, GO:0000413, GO:0016853
Sp	SPAL_0000366500.1	0.757106	0.367605	Most-adapted genes	GO:0008061, GO:0005576
Sp	SPAL_0000602100.1	0.756892	0.280556	Most-adapted genes
Sp	SPAL_0001087200.1	0.756673	0.33	Most-adapted genes
Sp	SPAL_0001609000.1	0.756222	0.366961	Most-adapted genes	GO:0008061, GO:0005576
Sp	SPAL_0001343400.1	0.75491	0.280528	Most-adapted genes
Sp	SPAL_0000363400.1	0.752777	0.244228	Most-adapted genes	GO:0005515
Sp	SPAL_0001683300.1	0.752478	0.470276	Most-adapted genes	GO:0042302, GO:0016020, GO:0016021
Sp	SPAL_0001236000.1	0.751535	0.348315	Most-adapted genes
Sp	SPAL_0000966300.1	0.749957	0.341085	Most-adapted genes
Sp	SPAL_0000673700.1	0.748201	0.259649	Most-adapted genes	GO:0016020, GO:0016021
Sp	SPAL_0000773400.1	0.748183	0.408779	Most-adapted genes	GO:0015935, GO:0006412, GO:0003735, GO:0003723
Sp	SPAL_0001444500.1	0.747784	0.340643	Most-adapted genes
Sp	SPAL_0001209200.1	0.746948	0.304762	Most-adapted genes
Sp	SPAL_0001503400.1	0.746827	0.528962	Most-adapted genes	GO:0042302, GO:0016020, GO:0016021
Sp	SPAL_0000751400.1	0.74677	0.359719	Most-adapted genes	GO:0008061, GO:0005576
Sp	SPAL_0001662700.1	0.745659	0.373121	Most-adapted genes	GO:0008061, GO:0005576
Sp	SPAL_0000163800.1	0.745367	0.261538	Most-adapted genes	GO:0005509
Sp	SPAL_0000673500.1	0.744655	0.311404	Most-adapted genes
Sp	SPAL_0001017900.1	0.74352	0.376039	Most-adapted genes	GO:0016459, GO:0003774
Sp	SPAL_0000657100.1	0.743222	0.397436	Most-adapted genes
Sp	SPAL_0000883600.1	0.742526	0.369963	Most-adapted genes	GO:0008289
Sp	SPAL_0000907850.1	0.741987	0.215385	Most-adapted genes
Sp	SPAL_0001080000.1	0.741132	0.2625	Most-adapted genes	GO:0016020, GO:0016021
Sp	SPAL_0001467400.1	0.741097	0.361181	Most-adapted genes	GO:0006556, GO:0004478, GO:0005524, GO:0046872, GO:0000166, GO:0016740, GO:0006730
Sp	SPAL_0000268500.1	0.741009	0.314943	Most-adapted genes	GO:0005515
Sp	SPAL_0000783800.1	0.740898	0.366031	Most-adapted genes	GO:0004332, GO:0006096, GO:0003824, GO:0016829
Sp	SPAL_0001710600.1	0.740803	0.330779	Most-adapted genes
Sp	SPAL_0001087600.1	0.740506	0.3	Most-adapted genes
Sp	SPAL_0001555900.1	0.73974	0.381941	Most-adapted genes	GO:0016459, GO:0003774, GO:0051015, GO:0005524, GO:0000166, GO:0003779
Sp	SPAL_0001049600.1	0.73943	0.428904	Most-adapted genes
Sp	SPAL_0000941600.1	0.739088	0.30303	Most-adapted genes	GO:0016020, GO:0016021
Sp	SPAL_0001296100.1	0.7389	0.400383	Most-adapted genes	GO:0005347, GO:0055085, GO:0016020, GO:0016021, GO:0015867
Sp	SPAL_0001132200.1	0.738873	0.315673	Most-adapted genes	GO:0016627, GO:0006629, GO:0016020, GO:0016021, GO:0055114
Sp	SPAL_0000377400.1	0.738603	0.41954	Most-adapted genes
Sp	SPAL_0000471300.1	0.738555	0.228205	Most-adapted genes
Sp	SPAL_0000829300.1	0.738437	0.265766	Most-adapted genes
Sp	SPAL_0000992600.1	0.73823	0.377169	Most-adapted genes	GO:0004332, GO:0006096, GO:0003824, GO:0016829
Sp	SPAL_0001132600.1	0.737078	0.470647	Most-adapted genes	GO:0042302, GO:0016020, GO:0016021
Sp	SPAL_0001053000.1	0.736378	0.28866	Most-adapted genes
Sp	SPAL_0000434100.1	0.736203	0.369637	Most-adapted genes	GO:0007275
Sp	SPAL_0000398500.1	0.736063	0.389323	Most-adapted genes
Sp	SPAL_0000903100.1	0.735525	0.443627	Most-adapted genes
Sp	SPAL_0001651500.1	0.735282	0.333333	Most-adapted genes
Sp	SPAL_0000110300.1	0.73371	0.355556	Most-adapted genes
Sp	SPAL_0000492100.1	0.73366	0.394004	Most-adapted genes	GO:0006101, GO:0004108, GO:0046912, GO:0006099, GO:0016740
Sp	SPAL_0001306400.1	0.733391	0.341772	Most-adapted genes	GO:0005509
Sp	SPAL_0001378000.1	0.733382	0.350617	Most-adapted genes	GO:0005840, GO:0006412, GO:0003735
Sp	SPAL_0000415000.1	0.733212	0.367837	Most-adapted genes	GO:0016639, GO:0006520, GO:0016491, GO:0055114, GO:0000166
Sp	SPAL_0001577350.1	0.732169	0.34386	Most-adapted genes
Sp	SPAL_0001107900.1	0.731755	0.410417	Most-adapted genes
Sp	SPAL_0000056100.1	0.730847	0.335868	Most-adapted genes	GO:0005509, GO:0005515
Sp	SPAL_0000330300.1	0.730414	0.379085	Most-adapted genes	GO:0005740, GO:0016021, GO:0016020, GO:0046872, GO:0005739, GO:0055114, GO:0005743, GO:0006099
Sp	SPAL_0000639600.1	0.730066	0.401473	Most-adapted genes	GO:0005840, GO:0006412, GO:0003735
Sp	SPAL_0000406200.1	0.728251	0.363914	Most-adapted genes	GO:0009253, GO:0003796, GO:0016998
Sp	SPAL_0001329600.1	0.728146	0.306931	Most-adapted genes
Sp	SPAL_0000225800.1	0.727687	0.378129	Most-adapted genes
Sp	SPAL_0000654800.1	0.727584	0.370066	Most-adapted genes	GO:0003824
Sp	SPAL_0001211200.1	0.726271	0.394122	Most-adapted genes	GO:0003756, GO:0045454, GO:0016853
Sp	SPAL_0000219200.2	0.726057	0.280702	Most-adapted genes	GO:0000062
Sp	SPAL_0001779900.1	0.725742	0.256757	Most-adapted genes
Sp	SPAL_0000061500.1	0.725701	0.41791	Most-adapted genes
Sp	SPAL_0000970300.1	0.725403	0.409657	Most-adapted genes	GO:0005840, GO:0006412, GO:0003735
Sp	SPAL_0001277900.1	0.72528	0.335586	Most-adapted genes	GO:0005615
Sp	SPAL_0000228100.1	0.725095	0.374892	Most-adapted genes
Sp	SPAL_0000647700.1	0.724343	0.419872	Most-adapted genes	GO:0000786, GO:0046982, GO:0042025, GO:0003677, GO:0005634, GO:0005694
Sp	SPAL_0001436900.1	0.72425	0.337398	Most-adapted genes	GO:0005509
Sp	SPAL_0001067900.1	0.723958	0.362477	Most-adapted genes
Sp	SPAL_0000878000.1	0.72373	0.283582	Most-adapted genes
Sp	SPAL_0001590600.1	0.723286	0.336364	Most-adapted genes	GO:0005853, GO:0003746, GO:0006414, GO:0006412
Sp	SPAL_0000240700.1	0.723205	0.389234	Most-adapted genes
Sp	SPAL_0001418200.1	0.722944	0.335938	Most-adapted genes
Sp	SPAL_0001715850.1	0.722566	0.413146	Most-adapted genes
Sp	SPAL_0000156000.1	0.722369	0.392857	Most-adapted genes	GO:0005840, GO:0006412, GO:0003735
Sp	SPAL_0000126600.1	0.722286	0.35352	Most-adapted genes
Sp	SPAL_0000534300.1	0.721974	0.372453	Most-adapted genes	GO:0006102, GO:0004450, GO:0051287, GO:0016616, GO:0000287, GO:0055114, GO:0046872, GO:0016491, GO:0006099
Sp	SPAL_0001470800.1	0.72197	0.37276	Most-adapted genes	GO:0030246
Sp	SPAL_0001588600.1	0.721428	0.530055	Most-adapted genes	GO:0042302, GO:0016020, GO:0016021
Sp	SPAL_0000270900.1	0.721228	0.404255	Most-adapted genes	GO:0005840, GO:0006412, GO:0003735
Sp	SPAL_0000114500.1	0.72116	0.302326	Most-adapted genes	GO:0016020, GO:0016021
Sp	SPAL_0001514900.1	0.721083	0.339715	Most-adapted genes	GO:0005737, GO:0051536, GO:0051539
Sp	SPAL_0000172800.1	0.720821	0.405724	Most-adapted genes	GO:0005840, GO:0006412, GO:0003735
Sp	SPAL_0000772100.1	0.720802	0.425926	Most-adapted genes	GO:0033177, GO:0033179, GO:0015078, GO:1902600, GO:0016020, GO:0016021, GO:0006811, GO:0005773, GO:0005774
Sp	SPAL_0000194300.1	0.720624	0.302564	Most-adapted genes	GO:0016702, GO:0055114, GO:0005506, GO:0046872, GO:0016491, GO:0017172, GO:0042412, GO:0051213
Sp	SPAL_0000729200.1	0.720605	0.413655	Most-adapted genes	GO:0005840, GO:0006412, GO:0003735
Sp	SPAL_0001210400.1	0.720241	0.233553	Most-adapted genes
Sp	SPAL_0001744800.1	0.719531	0.329193	Most-adapted genes
Sp	SPAL_0000821900.1	0.719275	0.363727	Most-adapted genes	GO:0008556, GO:0006813, GO:0016021, GO:0000166, GO:0005524, GO:0016020, GO:0046872, GO:0006811, GO:0071805
Sp	SPAL_0000647800.1	0.719231	0.445255	Most-adapted genes	GO:0000786, GO:0046982, GO:0003677, GO:0005634, GO:0005694
Sp	SPAL_0001056050.1	0.719139	0.207207	Most-adapted genes
Sp	SPAL_0001370000.1	0.719095	0.430279	Most-adapted genes
Sp	SPAL_0001662900.1	0.718358	0.309942	Most-adapted genes	GO:0004807, GO:0003824, GO:0016853, GO:0006096, GO:0006094
Sp	SPAL_0000240800.1	0.718077	0.398323	Most-adapted genes
Sp	SPAL_0000374700.2	0.717765	0.347093	Most-adapted genes	GO:0016020, GO:0016021
Sp	SPAL_0000155200.1	0.717107	0.442402	Most-adapted genes	GO:0015935, GO:0005840, GO:0006412, GO:0003735, GO:0003723, GO:1990904
Sp	SPAL_0001457000.1	0.717101	0.228758	Most-adapted genes
Sp	SPAL_0001432100.1	0.716928	0.488994	Most-adapted genes	GO:0042302, GO:0016020, GO:0016021
Sp	SPAL_0001517800.1	0.71674	0.301158	Most-adapted genes
Sp	SPAL_0001563200.1	0.716646	0.300175	Most-adapted genes	GO:0046872
Sp	SPAL_0000200300.1	0.716245	0.399573	Most-adapted genes	GO:0033180, GO:0046034, GO:1902600, GO:0046961, GO:0005524
Sp	SPAL_0001343500.1	0.716136	0.236667	Most-adapted genes
Sp	SPAL_0000887800.1	0.716004	0.404301	Most-adapted genes	GO:0005840, GO:0006412, GO:0003735, GO:0003723, GO:0003676
Sp	SPAL_0001496400.1	0.715991	0.415459	Most-adapted genes
Sp	SPAL_0001767900.1	0.715613	0.183824	Most-adapted genes
Sp	SPAL_0001044300.1	0.715557	0.340471	Most-adapted genes	GO:0008233, GO:0004867, GO:0010951, GO:0006508
Sp	SPAL_0000050400.1	0.715375	0.349887	Most-adapted genes	GO:0005200, GO:0005874, GO:0007017, GO:0005525, GO:0003924, GO:0000166, GO:0005737, GO:0005856, GO:0007010
Sp	SPAL_0001630700.1	0.714949	0.37963	Most-adapted genes	GO:0004190, GO:0006508, GO:0016787, GO:0008233
Sp	SPAL_0001076900.1	0.714908	0.360841	Most-adapted genes
Sp	SPAL_0000098300.1	0.714894	0.359307	Most-adapted genes
Sp	SPAL_0000219500.1	0.7143	0.395407	Most-adapted genes	GO:0032559, GO:0045261, GO:0015986, GO:0046933, GO:0046034, GO:1902600, GO:0005524, GO:0000166, GO:0006811, GO:0006754
Sp	SPAL_0001715100.1	0.713628	0.354938	Most-adapted genes	GO:0003796
Sp	SPAL_0000186000.1	0.712791	0.239247	Most-adapted genes
Sp	SPAL_0001554800.1	0.712695	0.425	Most-adapted genes
Sp	SPAL_0000335900.2	0.712672	0.320557	Most-adapted genes
Sp	SPAL_0001272100.1	0.712415	0.417054	Most-adapted genes	GO:0005840, GO:0006412, GO:0003735
Sp	SPAL_0001596100.1	0.712415	0.417054	Most-adapted genes	GO:0005840, GO:0006412, GO:0003735
Sp	SPAL_0001698300.1	0.712266	0.496435	Most-adapted genes	GO:0042302, GO:0016020, GO:0016021
Sp	SPAL_0000218500.1	0.711929	0.367546	Most-adapted genes	GO:0006006, GO:0016620, GO:0050661, GO:0051287, GO:0055114, GO:0000166, GO:0016491, GO:0006096, GO:0004365
Sp	SPAL_0000427100.1	0.711077	0.291429	Most-adapted genes	GO:0046872
Sp	SPAL_0001380400.1	0.710793	0.306763	Most-adapted genes	GO:0008289
Sp	SPAL_0001487000.1	0.710763	0.252874	Most-adapted genes
Sp	SPAL_0000960600.1	0.71071	0.367254	Most-adapted genes
Sp	SPAL_0000314000.1	0.71068	0.524283	Most-adapted genes	GO:0042302, GO:0016020, GO:0016021
Sp	SPAL_0000397900.1	0.71045	0.342541	Most-adapted genes
Sp	SPAL_0000379300.1	0.710077	0.360544	Most-adapted genes	GO:0005615
Sp	SPAL_0000743800.1	0.709862	0.423423	Most-adapted genes	GO:0005840, GO:0006412, GO:0003735
Sp	SPAL_0000016800.1	0.709525	0.436853	Most-adapted genes	GO:0042302, GO:0016020, GO:0016021
Sp	SPAL_0001349200.1	0.709415	0.262963	Most-adapted genes
Sp	SPAL_0000431600.1	0.709298	0.49725	Most-adapted genes	GO:0042302, GO:0016020, GO:0016021
Sp	SPAL_0000316200.1	0.70901	0.338095	Most-adapted genes	GO:0016020, GO:0016021
Sp	SPAL_0000995200.1	0.708832	0.406642	Most-adapted genes	GO:0045261, GO:0015986, GO:0046933, GO:0046034, GO:1902600, GO:0005524, GO:0000166, GO:0006754
Sp	SPAL_0001385500.1	0.708725	0.527412	Most-adapted genes	GO:0042302, GO:0016020, GO:0016021
Sp	SPAL_0000759800.1	0.708705	0.346618	Most-adapted genes
Sp	SPAL_0000147275.1	0.708698	0.294574	Most-adapted genes
Sp	SPAL_0000343600.1	0.708483	0.41453	Most-adapted genes
Sp	SPAL_0001417550.1	0.708058	0.212851	Most-adapted genes
Sp	SPAL_0000756700.1	0.708031	0.32381	Most-adapted genes	GO:0015450, GO:0006605, GO:0015031, GO:0006886, GO:0016020, GO:0016021, GO:0071806
Sp	SPAL_0000451900.1	0.707797	0.385512	Most-adapted genes	GO:0017076, GO:0004613, GO:0004611, GO:0006094, GO:0005525
Sp	SPAL_0001205500.1	0.707712	0.265403	Most-adapted genes
Sp	SPAL_0000693500.1	0.70749	0.265766	Most-adapted genes
Sp	SPAL_0001484600.1	0.707486	0.418605	Most-adapted genes	GO:0005840, GO:0006412, GO:0003735
Sp	SPAL_0001068000.1	0.707388	0.415873	Most-adapted genes	GO:0042254, GO:0005840
Sp	SPAL_0000750800.1	0.707114	0.367816	Most-adapted genes	GO:0000015, GO:0004634, GO:0006096, GO:0000287
Sp	SPAL_0000047000.1	0.707069	0.311111	Most-adapted genes	GO:0046872
Sp	SPAL_0000372500.1	0.70678	0.328179	Most-adapted genes	GO:0015078, GO:0033180, GO:1902600, GO:0006811
Sp	SPAL_0000993100.1	0.706676	0.320833	Most-adapted genes	GO:0005960, GO:0019464, GO:0005739
Sp	SPAL_0001554100.1	0.706563	0.381679	Most-adapted genes	GO:0005840, GO:0006412, GO:0003735
Sp	SPAL_0001697100.2	0.706482	0.355204	Most-adapted genes
Sp	SPAL_0000343400.1	0.706309	0.29235	Most-adapted genes
Sp	SPAL_0000442900.1	0.706259	0.371388	Most-adapted genes	GO:0015031, GO:0016020, GO:0016021
Sp	SPAL_0000924800.1	0.706037	0.475275	Most-adapted genes	GO:0042302, GO:0016020, GO:0016021
Sp	SPAL_0001004400.1	0.706017	0.306854	Most-adapted genes	GO:0008234, GO:0006508
Sp	SPAL_0000630400.1	0.705415	0.256983	Most-adapted genes
Sp	SPAL_0001771100.1	0.705161	0.254902	Most-adapted genes
Sp	SPAL_0001331300.1	0.705157	0.247126	Most-adapted genes
Sp	SPAL_0001373600.2	0.705117	0.313492	Most-adapted genes	GO:0005515, GO:0046872
Sp	SPAL_0000673300.1	0.704953	0.302181	Most-adapted genes	GO:0003824
Sp	SPAL_0000822000.1	0.704918	0.541063	Most-adapted genes
Sp	SPAL_0000751000.1	0.704873	0.403756	Most-adapted genes	GO:0008121, GO:0006122, GO:0016020, GO:0005739, GO:0055114, GO:0005743, GO:0070469
Sp	SPAL_0000099900.1	0.704679	0.242798	Most-adapted genes
Sp	SPAL_0001204400.1	0.704319	0.323362	Most-adapted genes
Sp	SPAL_0000835000.1	0.70426	0.237319	Most-adapted genes
Sp	SPAL_0000969350.1	0.703851	0.327869	Most-adapted genes	GO:0005750, GO:0006122, GO:0005743, GO:0016020, GO:0016021
Sp	SPAL_0000192100.1	0.703817	0.264	Most-adapted genes
Sp	SPAL_0001620400.1	0.703734	0.348296	Most-adapted genes	GO:0008234, GO:0006508, GO:0016787, GO:0008233
Sp	SPAL_0001432700.1	0.703661	0.382883	Most-adapted genes	GO:0016020, GO:0016021
Sp	SPAL_0001220300.1	0.703653	0.318841	Most-adapted genes
Sp	SPAL_0000477400.1	0.703428	0.279693	Most-adapted genes
Sp	SPAL_0000491500.1	0.703197	0.363834	Most-adapted genes	GO:0004672, GO:0006468, GO:0005524, GO:0000166, GO:0004674
Sp	SPAL_0000912500.1	0.703085	0.401376	Most-adapted genes	GO:0004013, GO:0016787, GO:0006730
Sp	SPAL_0001335600.1	0.702948	0.234234	Most-adapted genes
Sp	SPAL_0000969400.1	0.702434	0.395445	Most-adapted genes	GO:0005840, GO:0006412, GO:0003735
Sp	SPAL_0001309100.1	0.702429	0.346939	Most-adapted genes
Sp	SPAL_0000548600.1	0.702274	0.27673	Most-adapted genes
Sp	SPAL_0001407850.1	0.702064	0.189189	Most-adapted genes
Sp	SPAL_0000239400.1	0.701997	0.330986	Most-adapted genes
Sp	SPAL_0000702200.1	0.701957	0.31951	Most-adapted genes	GO:0004645, GO:0008184, GO:0005975, GO:0030170, GO:0016740, GO:0016757, GO:0102250, GO:0102499
Sp	SPAL_0001003200.1	0.701946	0.385542	Most-adapted genes	GO:0004129, GO:0016020, GO:0016021, GO:0022900, GO:1902600
Sp	SPAL_0001737700.1	0.701669	0.43252	Most-adapted genes	GO:0005840, GO:0006412, GO:0003735
Sp	SPAL_0001351575.1	0.70165	0.307937	Most-adapted genes
Sp	SPAL_0000807400.1	0.701276	0.537747	Most-adapted genes
Sp	SPAL_0000170200.1	0.701244	0.355903	Most-adapted genes
Sp	SPAL_0000710800.1	0.701243	0.262745	Most-adapted genes
Sp	SPAL_0001268800.1	0.701098	0.362366	Most-adapted genes	GO:0005743, GO:0005347, GO:0022857, GO:0055085, GO:0016020, GO:0016021, GO:0015867
Sp	SPAL_0001480900.1	0.700953	0.45614	Most-adapted genes	GO:0005840, GO:0006412, GO:0003735
Sp	SPAL_0001741300.1	0.700889	0.321905	Most-adapted genes	GO:0033179, GO:0015078, GO:1902600, GO:0006811
Sp	SPAL_0000414500.1	0.700766	0.445578	Most-adapted genes
Sp	SPAL_0001715900.1	0.700608	0.302419	Most-adapted genes	GO:0008289
Sp	SPAL_0000457400.1	0.700517	0.311445	Most-adapted genes	GO:0046872
Sp	SPAL_0000585900.1	0.70037	0.341816	Most-adapted genes
Sp	SPAL_0001279400.1	0.700332	0.334586	Most-adapted genes
Sp	SPAL_0001600800.1	0.7003	0.379353	Most-adapted genes
Sp	SPAL_0001578900.1	0.7003	0.305085	Most-adapted genes
Sp	SPAL_0001515300.1	0.700071	0.308176	Most-adapted genes	GO:0072321, GO:0005758, GO:0046872, GO:0005739, GO:0015031, GO:0005743
Sp	SPAL_0000614150.1	0.700063	0.362745	Most-adapted genes
Sp	SPAL_0001407933.1	0.700061	0.216667	Most-adapted genes
Sp	SPAL_0001648400.1	0.700026	0.357456	Most-adapted genes	GO:0005840, GO:0006412, GO:0003735
Sp	SPAL_0001329000.1	0.699984	0.395143	Most-adapted genes
Sp	SPAL_0001662600.1	0.699981	0.306733	Most-adapted genes	GO:0018996, GO:0008270, GO:0006508, GO:0004222, GO:0008237, GO:0005576
Sp	SPAL_0001561000.1	0.699969	0.253669	Most-adapted genes
Sp	SPAL_0000771100.1	0.699928	0.324731	Most-adapted genes	GO:0005840, GO:0006412, GO:0003735
Sp	SPAL_0000030900.1	0.699806	0.427115	Most-adapted genes	GO:0005515
Sp	SPAL_0001328500.1	0.699803	0.297043	Most-adapted genes
Sp	SPAL_0000099600.1	0.69976	0.223404	Most-adapted genes
Sp	SPAL_0001736500.1	0.699756	0.366667	Most-adapted genes	GO:0005200, GO:0005874, GO:0007017, GO:0005525, GO:0003924, GO:0000166, GO:0005737, GO:0005856, GO:0007010
Sp	SPAL_0001415400.1	0.699743	0.354916	Most-adapted genes	GO:0005840, GO:0006412, GO:0003735, GO:0003723
Sp	SPAL_0001261700.1	0.699664	0.333333	Most-adapted genes
Sp	SPAL_0001344700.1	0.699238	0.325378	Most-adapted genes
Sp	SPAL_0001302300.1	0.69896	0.340974	Most-adapted genes	GO:0004521, GO:0090502
Sp	SPAL_0000406300.1	0.698826	0.373089	Most-adapted genes	GO:0009253, GO:0003796, GO:0016998
Sp	SPAL_0000557800.1	0.698703	0.369565	Most-adapted genes
Sp	SPAL_0001024600.1	0.698609	0.401667	Most-adapted genes	GO:0005840, GO:0006412, GO:0003735
Sp	SPAL_0000817000.1	0.698433	0.295652	Most-adapted genes
Sp	SPAL_0001155100.1	0.698327	0.305652	Most-adapted genes
Sp	SPAL_0000534400.2	0.698292	0.375566	Most-adapted genes	GO:0000413, GO:0006457, GO:0003755, GO:0016853
Sp	SPAL_0000825900.1	0.697973	0.232836	Most-adapted genes
Sp	SPAL_0001182400.1	0.697973	0.232836	Most-adapted genes
Sp	SPAL_0000610100.1	0.697585	0.416076	Most-adapted genes	GO:0005840, GO:0006412, GO:0003735
Sp	SPAL_0001270000.1	0.697544	0.390625	Most-adapted genes	GO:0005840, GO:0006412, GO:0003735
Sp	SPAL_0001412300.1	0.697489	0.366044	Most-adapted genes	GO:0005853, GO:0003746, GO:0006414, GO:0006412
Sp	SPAL_0001005300.1	0.697307	0.388652	Most-adapted genes	GO:0005840, GO:0006412, GO:0003735
Sp	SPAL_0001415000.1	0.697247	0.409314	Most-adapted genes	GO:0005840, GO:0006412, GO:0003735
Sp	SPAL_0001613000.1	0.697236	0.290249	Most-adapted genes
Sp	SPAL_0001376300.1	0.697137	0.46627	Most-adapted genes	GO:0042302, GO:0016020, GO:0016021
Sp	SPAL_0000303950.1	0.696788	0.236111	Most-adapted genes
Sp	SPAL_0000437200.1	0.696738	0.241667	Most-adapted genes
Sp	SPAL_0000809100.1	0.696736	0.29304	Most-adapted genes
Sp	SPAL_0000700300.1	0.696549	0.370892	Most-adapted genes	GO:0016021, GO:0016020
Sp	SPAL_0000079000.1	0.696213	0.419872	Most-adapted genes	GO:0000786, GO:0046982, GO:0042025, GO:0003677, GO:0005634, GO:0005694
Sp	SPAL_0001194700.1	0.696191	0.273224	Most-adapted genes
Sp	SPAL_0000432500.1	0.696091	0.402067	Most-adapted genes	GO:0022900, GO:0016627, GO:0050660, GO:0006099, GO:0016491, GO:0055114, GO:0016020, GO:0005743, GO:0008177
Sp	SPAL_0000799575.1	0.695928	0.29697	Most-adapted genes
Sp	SPAL_0001009200.1	0.695825	0.35079	Most-adapted genes	GO:0006086, GO:0004739, GO:0043231, GO:0016624, GO:0016491, GO:0055114
Sp	SPAL_0000630800.1	0.695731	0.401606	Most-adapted genes	GO:0005840, GO:0006412, GO:0003735
Sp	SPAL_0000545900.1	0.695722	0.255034	Most-adapted genes
Sp	SPAL_0000553700.1	0.695624	0.409483	Most-adapted genes
Sp	SPAL_0000370600.1	0.695376	0.311778	Most-adapted genes	GO:0008233, GO:0006508
Sp	SPAL_0001400800.1	0.695213	0.245614	Most-adapted genes
Sp	SPAL_0001341600.2	0.695197	0.236287	Most-adapted genes	GO:0016020, GO:0016021
Sp	SPAL_0001023000.1	0.695151	0.311526	Most-adapted genes
Sp	SPAL_0001158500.1	0.694936	0.31529	Most-adapted genes	GO:0006629
Sp	SPAL_0000373900.1	0.694904	0.428224	Most-adapted genes	GO:0000786, GO:0046982, GO:0003677, GO:0005634, GO:0005694
Sp	SPAL_0001695900.1	0.694901	0.373253	Most-adapted genes	GO:0048037, GO:0003824, GO:0000166, GO:0005739, GO:0016874, GO:0006099, GO:0004775, GO:0004776
Sp	SPAL_0001075500.1	0.694878	0.344108	Most-adapted genes	GO:0016459, GO:0003774, GO:0051015, GO:0005524, GO:0000166, GO:0003779
Sp	SPAL_0000735200.1	0.694827	0.331183	Most-adapted genes	GO:0005615
Sp	SPAL_0000594466.1	0.694776	0.209524	Most-adapted genes	GO:0008146
Sp	SPAL_0001694300.1	0.694748	0.321138	Most-adapted genes	GO:0042719, GO:0045039, GO:0042721, GO:0046872, GO:0005739, GO:0015031
Sp	SPAL_0000584300.1	0.694631	0.281746	Most-adapted genes
Sp	SPAL_0001531400.1	0.694508	0.354337	Most-adapted genes
Sp	SPAL_0001429700.1	0.694275	0.338951	Most-adapted genes	GO:0006796, GO:0004427, GO:0005737, GO:0000287
Sp	SPAL_0001185125.1	0.694033	0.244726	Most-adapted genes
Sp	SPAL_0000687700.1	0.693907	0.244161	Most-adapted genes
Sp	SPAL_0000800300.1	0.693745	0.37037	Most-adapted genes
Sp	SPAL_0001108200.1	0.693372	0.36357	Most-adapted genes
Sp	SPAL_0001468050.1	0.693369	0.193939	Most-adapted genes	GO:0016020, GO:0016021
Sp	SPAL_0000060400.1	0.693267	0.385084	Most-adapted genes
Sp	SPAL_0001618700.1	0.693237	0.41639	Most-adapted genes	GO:0005743, GO:0005347, GO:0022857, GO:0055085, GO:0016020, GO:0016021, GO:0015867
Sp	SPAL_0000785000.1	0.693236	0.277778	Most-adapted genes
Sp	SPAL_0000156300.1	0.692989	0.304167	Most-adapted genes
Sp	SPAL_0000171000.1	0.692985	0.390146	Most-adapted genes	GO:0000166, GO:0005524
Sp	SPAL_0000636000.1	0.692968	0.421429	Most-adapted genes	GO:0015934, GO:0005840, GO:0006412, GO:0003735
Sp	SPAL_0001358700.1	0.692598	0.348055	Most-adapted genes	GO:0006816, GO:0005432, GO:0007154, GO:0055085, GO:0016021, GO:0016020, GO:0035725
Sp	SPAL_0000724500.1	0.692399	0.257752	Most-adapted genes
Sp	SPAL_0001344400.1	0.692175	0.283489	Most-adapted genes	GO:0006662, GO:0015035, GO:0045454, GO:0055114
Sp	SPAL_0000840300.1	0.69216	0.472222	Most-adapted genes	GO:0042302, GO:0016020, GO:0016021
Sp	SPAL_0000548000.1	0.69199	0.257971	Most-adapted genes
Sp	SPAL_0001445300.1	0.691966	0.383013	Most-adapted genes	GO:0046034, GO:1902600, GO:0005524
Sp	SPAL_0000597400.1	0.691924	0.331292	Most-adapted genes
Sp	SPAL_0000322700.1	0.691043	0.373777	Most-adapted genes	GO:0016620, GO:0016491, GO:0055114
Sp	SPAL_0000294400.1	0.690823	0.351159	Most-adapted genes	GO:0005515
Sp	SPAL_0000089700.1	0.690766	0.40303	Most-adapted genes
Sp	SPAL_0000055800.1	0.690467	0.315501	Most-adapted genes
Sp	SPAL_0001303600.1	0.690466	0.363426	Most-adapted genes	GO:0005576
Sp	SPAL_0000435000.1	0.690422	0.355338	Most-adapted genes	GO:0006520, GO:0009058, GO:0030170, GO:0008483, GO:0003824, GO:0016740, GO:0004069
Sp	SPAL_0000677500.1	0.690399	0.407599	Most-adapted genes	GO:0015935, GO:0006412, GO:0003735, GO:0003723, GO:0019843, GO:0005840
Sp	SPAL_0001644900.1	0.690174	0.311499	Most-adapted genes	GO:0006508, GO:0004222, GO:0008237
Sp	SPAL_0000474100.1	0.689993	0.3725	Most-adapted genes
Sp	SPAL_0001649600.2	0.689866	0.434728	Most-adapted genes	GO:0005840, GO:0006412, GO:0003735, GO:0003723, GO:0019843
Sp	SPAL_0000970400.1	0.689666	0.328042	Most-adapted genes
Sp	SPAL_0001657200.1	0.689471	0.307116	Most-adapted genes
Sp	SPAL_0001252500.1	0.689175	0.416667	Most-adapted genes
Sp	SPAL_0001184100.1	0.689105	0.258567	Most-adapted genes
Sp	SPAL_0001587200.1	0.689033	0.396277	Most-adapted genes
Sp	SPAL_0000678400.1	0.689025	0.401869	Most-adapted genes	GO:0005840, GO:0006412, GO:0003735
Sp	SPAL_0000885800.1	0.688827	0.342508	Most-adapted genes	GO:0016020, GO:0016021
Sp	SPAL_0001193300.1	0.688797	0.356757	Most-adapted genes	GO:0006629, GO:0016020, GO:0016021
Sp	SPAL_0000279700.1	0.688513	0.259887	Most-adapted genes
Sp	SPAL_0000248100.1	0.688469	0.303371	Most-adapted genes
Sp	SPAL_0000379400.1	0.688386	0.351515	Most-adapted genes	GO:0005615
Sp	SPAL_0000377300.2	0.688312	0.448541	Most-adapted genes
Sp	SPAL_0000346400.1	0.688258	0.360137	Most-adapted genes
Sp	SPAL_0000530700.1	0.688236	0.331731	Most-adapted genes
Sp	SPAL_0000618200.1	0.68821	0.339597	Most-adapted genes
Sp	SPAL_0000570100.1	0.688069	0.265432	Most-adapted genes	GO:0016020, GO:0016021
Sp	SPAL_0001625700.1	0.688005	0.372428	Most-adapted genes	GO:0005509
Sp	SPAL_0000518900.1	0.687978	0.423892	Most-adapted genes	GO:0005840, GO:0006412, GO:0003735
Sp	SPAL_0001310200.1	0.687797	0.525351	Most-adapted genes
Sp	SPAL_0001241300.1	0.687796	0.475	Most-adapted genes
Sp	SPAL_0001072700.1	0.68768	0.327273	Most-adapted genes
Sp	SPAL_0000457100.1	0.687528	0.209246	Most-adapted genes
Sp	SPAL_0000927700.1	0.687528	0.209246	Most-adapted genes
Sp	SPAL_0000342700.1	0.687117	0.257891	Most-adapted genes
Sp	SPAL_0000468400.3	0.687116	0.344601	Most-adapted genes	GO:0016459, GO:0003774, GO:0051015, GO:0005524, GO:0000166, GO:0003779
Sp	SPAL_0000036100.1	0.687071	0.309645	Most-adapted genes
Sp	SPAL_0000336000.1	0.686921	0.305296	Most-adapted genes
Sp	SPAL_0000630900.1	0.686709	0.359618	Most-adapted genes	GO:0030246
Sp	SPAL_0000876400.1	0.686627	0.354113	Most-adapted genes
Sp	SPAL_0000672600.1	0.686605	0.355251	Most-adapted genes	GO:0008234, GO:0006508
Sp	SPAL_0000615800.1	0.686579	0.327122	Most-adapted genes
Sp	SPAL_0001638900.1	0.686531	0.270202	Most-adapted genes	GO:0005615
Sp	SPAL_0000052100.1	0.686523	0.304094	Most-adapted genes
Sp	SPAL_0000866800.1	0.686359	0.311499	Most-adapted genes	GO:0006508, GO:0004222, GO:0008237
Sp	SPAL_0001538000.1	0.686266	0.318352	Most-adapted genes
Sp	SPAL_0000230600.1	0.68622	0.37574	Most-adapted genes	GO:0006108, GO:0016615, GO:0030060, GO:0019752, GO:0016616, GO:0005975, GO:0016491, GO:0055114, GO:0003824, GO:0006099
Sp	SPAL_0001754300.1	0.686146	0.337553	Most-adapted genes
Sp	SPAL_0001147400.1	0.685679	0.289308	Most-adapted genes
Sp	SPAL_0001032400.1	0.685649	0.334441	Most-adapted genes	GO:0006334, GO:0005634
Sp	SPAL_0001203250.1	0.68559	0.278431	Most-adapted genes
Sp	SPAL_0000772750.1	0.685381	0.254197	Most-adapted genes
Sp	SPAL_0000666700.1	0.685148	0.460317	Most-adapted genes
Sp	SPAL_0001565000.1	0.684999	0.361396	Most-adapted genes	GO:0045239, GO:0006106, GO:0004333, GO:0016829, GO:0006099, GO:0003824
Sp	SPAL_0000207400.1	0.684944	0.325103	Most-adapted genes	GO:0030246
Sp	SPAL_0000071100.1	0.684865	0.353616	Most-adapted genes
Sp	SPAL_0000800200.1	0.684596	0.375969	Most-adapted genes
Sp	SPAL_0000622600.1	0.684592	0.22963	Most-adapted genes
Sp	SPAL_0000694800.1	0.68458	0.353019	Most-adapted genes	GO:0003723, GO:0003676
Sp	SPAL_0000283900.1	0.684543	0.337662	Most-adapted genes
Sp	SPAL_0000863800.1	0.684536	0.32567	Most-adapted genes
Sp	SPAL_0000418200.1	0.684515	0.289362	Most-adapted genes
Sp	SPAL_0001219900.1	0.684323	0.285714	Most-adapted genes
Sp	SPAL_0001664700.1	0.684255	0.309002	Most-adapted genes
Sp	SPAL_0000779800.1	0.684195	0.39292	Most-adapted genes	GO:0042026, GO:0006457, GO:0005524
Sp	SPAL_0001640100.1	0.684158	0.308616	Most-adapted genes	GO:0016020, GO:0016021
Sp	SPAL_0000631400.1	0.68405	0.307207	Most-adapted genes	GO:0004867, GO:0016020, GO:0016021, GO:0010951
Sp	SPAL_0001251750.1	0.684003	0.232804	Most-adapted genes
Sp	SPAL_0000331100.1	0.683818	0.404938	Most-adapted genes	GO:0005840, GO:0006412, GO:0003735
Sp	SPAL_0000570900.1	0.68356	0.331633	Most-adapted genes	GO:0003824
Sp	SPAL_0001242500.1	0.683547	0.236735	Most-adapted genes	GO:1902884, GO:0030206, GO:0047756, GO:0008146, GO:0016021
Sp	SPAL_0001234100.1	0.683543	0.359223	Most-adapted genes	GO:0005525, GO:0003924
Sp	SPAL_0000641900.1	0.683528	0.301811	Most-adapted genes	GO:0016787
Sp	SPAL_0000467800.1	0.683329	0.372057	Most-adapted genes
Sp	SPAL_0001402800.1	0.683222	0.275132	Most-adapted genes
Sp	SPAL_0001720400.1	0.683149	0.435065	Most-adapted genes
Sp	SPAL_0001266400.1	0.683061	0.259259	Most-adapted genes	GO:0008080
Sp	SPAL_0000949700.1	0.683015	0.353111	Most-adapted genes	GO:0005509, GO:0005515
Sp	SPAL_0000266800.1	0.68295	0.408163	Most-adapted genes	GO:0016020, GO:0016021
Sp	SPAL_0000403500.1	0.68289	0.293753	Most-adapted genes	GO:0031418, GO:0008475, GO:0016491, GO:0055114, GO:0016705, GO:0005506
Sp	SPAL_0000707900.1	0.682846	0.353704	Most-adapted genes	GO:0016020, GO:0016021
Sp	SPAL_0001438900.1	0.682738	0.347604	Most-adapted genes
Sp	SPAL_0000200100.1	0.68267	0.343685	Most-adapted genes	GO:0046034
Sp	SPAL_0000486000.1	0.682664	0.316785	Most-adapted genes	GO:0016471, GO:1902600, GO:0042626, GO:0006811
Sp	SPAL_0000683000.1	0.682647	0.314176	Most-adapted genes	GO:0016020, GO:0016021
Sp	SPAL_0001228900.1	0.0802077	0.584211	Least-adapted genes
Sp	SPAL_0000958400.1	0.145267	0.551402	Least-adapted genes
Sp	SPAL_0000004900.1	0.149235	0.5625	Least-adapted genes
Sp	SPAL_0001679100.1	0.164969	0.575342	Least-adapted genes
Sp	SPAL_0001573750.1	0.166962	0.558685	Least-adapted genes
Sp	SPAL_0000890600.1	0.182482	0.553571	Least-adapted genes
Sp	SPAL_0001373900.1	0.185086	0.460526	Least-adapted genes
Sp	SPAL_0000531300.1	0.19726	0.435484	Least-adapted genes
Sp	SPAL_0000446975.1	0.206005	0.509259	Least-adapted genes
Sp	SPAL_0001353475.1	0.210266	0.51462	Least-adapted genes
Sp	SPAL_0000012700.1	0.211384	0.435484	Least-adapted genes
Sp	SPAL_0001777100.1	0.213194	0.430303	Least-adapted genes
Sp	SPAL_0000718575.1	0.2163	0.514925	Least-adapted genes
Sp	SPAL_0001777600.1	0.217258	0.298246	Least-adapted genes
Sp	SPAL_0000078800.1	0.23175	0.501425	Least-adapted genes
Sp	SPAL_0000849700.1	0.234376	0.635294	Least-adapted genes
Sp	SPAL_0001146500.1	0.235094	0.404494	Least-adapted genes
Sp	SPAL_0001062825.1	0.237446	0.458874	Least-adapted genes
Sp	SPAL_0001778600.1	0.242683	0.48996	Least-adapted genes	GO:0016020, GO:0016021
Sp	SPAL_0000718625.1	0.244463	0.522388	Least-adapted genes
Sp	SPAL_0001143900.1	0.245373	0.405797	Least-adapted genes
Sp	SPAL_0001331625.1	0.250036	0.519126	Least-adapted genes
Sp	SPAL_0001126000.1	0.251757	0.663078	Least-adapted genes
Sp	SPAL_0001493500.1	0.254078	0.344828	Least-adapted genes
Sp	SPAL_0001338900.1	0.255648	0.5	Least-adapted genes
Sp	SPAL_0001104200.1	0.255996	0.470501	Least-adapted genes	GO:0032300, GO:0006298, GO:0016887
Sp	SPAL_0001057250.1	0.258756	0.398551	Least-adapted genes	GO:0016020, GO:0016021
Sp	SPAL_0001770200.1	0.258952	0.476923	Least-adapted genes
Sp	SPAL_0000212500.1	0.261937	0.452736	Least-adapted genes
Sp	SPAL_0000552100.1	0.26211	0.436242	Least-adapted genes
Sp	SPAL_0001088600.1	0.267103	0.441176	Least-adapted genes
Sp	SPAL_0001612400.1	0.267511	0.380435	Least-adapted genes
Sp	SPAL_0000113700.1	0.272854	0.428571	Least-adapted genes
Sp	SPAL_0000262100.1	0.274561	0.414239	Least-adapted genes
Sp	SPAL_0001760300.1	0.275775	0.358696	Least-adapted genes
Sp	SPAL_0000089800.1	0.277449	0.44316	Least-adapted genes
Sp	SPAL_0000371300.1	0.277946	0.300493	Least-adapted genes
Sp	SPAL_0000767900.1	0.278279	0.322368	Least-adapted genes
Sp	SPAL_0000607700.1	0.278657	0.365079	Least-adapted genes	GO:0016020, GO:0016021
Sp	SPAL_0000325300.1	0.279006	0.369748	Least-adapted genes
Sp	SPAL_0000718700.1	0.279025	0.474242	Least-adapted genes
Sp	SPAL_0000654200.1	0.279463	0.362245	Least-adapted genes
Sp	SPAL_0001715000.1	0.279928	0.438202	Least-adapted genes
Sp	SPAL_0000548800.1	0.279953	0.451557	Least-adapted genes
Sp	SPAL_0001770000.1	0.282125	0.465201	Least-adapted genes
Sp	SPAL_0000995800.1	0.286701	0.428088	Least-adapted genes
Sp	SPAL_0001094200.1	0.287035	0.390476	Least-adapted genes
Sp	SPAL_0001623550.1	0.28742	0.326797	Least-adapted genes
Sp	SPAL_0000543500.1	0.288861	0.507937	Least-adapted genes
Sp	SPAL_0000763100.1	0.289156	0.339744	Least-adapted genes
Sp	SPAL_0001497775.1	0.291846	0.380952	Least-adapted genes
Sp	SPAL_0001363800.1	0.292285	0.312	Least-adapted genes
Sp	SPAL_0000483850.1	0.292648	0.343915	Least-adapted genes	GO:0016020, GO:0016021
Sp	SPAL_0001300100.1	0.292655	0.509202	Least-adapted genes
Sp	SPAL_0001191900.1	0.293313	0.465447	Least-adapted genes
Sp	SPAL_0000485700.1	0.293339	0.388128	Least-adapted genes	GO:0016020, GO:0016021
Sp	SPAL_0000535225.1	0.294114	0.43662	Least-adapted genes
Sp	SPAL_0000347100.1	0.294762	0.436782	Least-adapted genes
Sp	SPAL_0000659100.1	0.295047	0.431095	Least-adapted genes
Sp	SPAL_0001403500.1	0.295633	0.43	Least-adapted genes
Sp	SPAL_0000562500.1	0.296722	0.513441	Least-adapted genes
Sp	SPAL_0001722700.1	0.297575	0.447368	Least-adapted genes
Sp	SPAL_0000972050.1	0.298005	0.468085	Least-adapted genes
Sp	SPAL_0000543200.1	0.299681	0.427293	Least-adapted genes
Sp	SPAL_0000079700.1	0.302648	0.576923	Least-adapted genes
Sp	SPAL_0000882400.3	0.304652	0.416139	Least-adapted genes	GO:0015074, GO:0003676
Sp	SPAL_0001292400.1	0.304851	0.419872	Least-adapted genes
Sp	SPAL_0001325300.1	0.304962	0.408964	Least-adapted genes
Sp	SPAL_0001590750.1	0.305102	0.433604	Least-adapted genes
Sp	SPAL_0001100000.1	0.306174	0.439324	Least-adapted genes
Sp	SPAL_0000072700.1	0.306381	0.428571	Least-adapted genes
Sp	SPAL_0000130300.1	0.30709	0.443452	Least-adapted genes
Sp	SPAL_0000556400.1	0.307368	0.406627	Least-adapted genes
Sp	SPAL_0000962700.1	0.307599	0.455026	Least-adapted genes
Sp	SPAL_0001194300.1	0.30868	0.445808	Least-adapted genes
Sp	SPAL_0001607300.1	0.310504	0.428732	Least-adapted genes
Sp	SPAL_0000436500.1	0.310978	0.396135	Least-adapted genes
Sp	SPAL_0000941300.1	0.311112	0.494118	Least-adapted genes
Sp	SPAL_0000104100.1	0.31124	0.432781	Least-adapted genes	GO:0008080
Sp	SPAL_0000720800.1	0.311337	0.333333	Least-adapted genes	GO:0016020, GO:0016021
Sp	SPAL_0001064500.1	0.31143	0.375315	Least-adapted genes	GO:0003690, GO:0006355
Sp	SPAL_0001181600.1	0.311654	0.402685	Least-adapted genes	GO:0008076, GO:0006813, GO:0005249, GO:0051260, GO:0005216, GO:0006811, GO:0055085, GO:0016020, GO:0005515, GO:0016021, GO:0005244, GO:0005267, GO:0034765, GO:0071805
Sp	SPAL_0000948100.1	0.311897	0.387464	Least-adapted genes
Sp	SPAL_0001779600.1	0.312224	0.478261	Least-adapted genes
Sp	SPAL_0000710600.1	0.312652	0.42349	Least-adapted genes
Sp	SPAL_0001391300.1	0.312668	0.445	Least-adapted genes
Sp	SPAL_0000926900.1	0.313014	0.424242	Least-adapted genes
Sp	SPAL_0001602600.1	0.313036	0.458333	Least-adapted genes	GO:0005524, GO:0000166
Sp	SPAL_0000186800.1	0.313077	0.396252	Least-adapted genes	GO:0016020, GO:0016021
Sp	SPAL_0001456400.1	0.313647	0.373626	Least-adapted genes
Sp	SPAL_0000187100.1	0.314903	0.441595	Least-adapted genes
Sp	SPAL_0001205800.1	0.316236	0.425703	Least-adapted genes
Sp	SPAL_0000426600.1	0.316342	0.36859	Least-adapted genes
Sp	SPAL_0000249250.1	0.317558	0.278539	Least-adapted genes	GO:0016020, GO:0016021
Sp	SPAL_0000523800.1	0.320393	0.428571	Least-adapted genes
Sp	SPAL_0001774600.1	0.320752	0.469586	Least-adapted genes
Sp	SPAL_0000669000.1	0.321244	0.349206	Least-adapted genes
Sp	SPAL_0000875200.1	0.321899	0.414698	Least-adapted genes
Sp	SPAL_0000611700.1	0.324255	0.407407	Least-adapted genes
Sp	SPAL_0001670600.1	0.32475	0.417323	Least-adapted genes	GO:0016020, GO:0016021
Sp	SPAL_0001476300.1	0.32515	0.435897	Least-adapted genes
Sp	SPAL_0001250900.1	0.326501	0.439759	Least-adapted genes
Sp	SPAL_0001121000.1	0.326574	0.434174	Least-adapted genes
Sp	SPAL_0001196300.1	0.326647	0.402737	Least-adapted genes
Sp	SPAL_0000311300.1	0.327076	0.40607	Least-adapted genes
Sp	SPAL_0001455100.1	0.32795	0.45841	Least-adapted genes
Sp	SPAL_0001511350.1	0.327964	0.367521	Least-adapted genes
Sp	SPAL_0000708400.1	0.328023	0.396104	Least-adapted genes	GO:0046982, GO:0005634
Sp	SPAL_0000724300.1	0.328995	0.38189	Least-adapted genes	GO:0004523, GO:0003676, GO:0090502
Sp	SPAL_0000801700.1	0.329128	0.422222	Least-adapted genes	GO:0016020, GO:0016021
Sp	SPAL_0001365000.1	0.329509	0.357895	Least-adapted genes
Sp	SPAL_0000044000.1	0.329849	0.353312	Least-adapted genes
Sp	SPAL_0000881000.1	0.330651	0.428385	Least-adapted genes	GO:0008270, GO:0003676
Sp	SPAL_0000209900.1	0.330707	0.411439	Least-adapted genes	GO:0003677
Sp	SPAL_0000290200.1	0.330774	0.45173	Least-adapted genes
Sp	SPAL_0000722800.1	0.331164	0.435049	Least-adapted genes
Sp	SPAL_0000818100.1	0.331236	0.426009	Least-adapted genes
Sp	SPAL_0000536000.1	0.33149	0.459807	Least-adapted genes
Sp	SPAL_0000388100.1	0.331669	0.375421	Least-adapted genes	GO:0004721, GO:0006397, GO:0005634, GO:0006470
Sp	SPAL_0001221400.1	0.331895	0.384615	Least-adapted genes	GO:0016020, GO:0016021
Sp	SPAL_0000775900.1	0.332127	0.420348	Least-adapted genes
Sp	SPAL_0000449200.1	0.332393	0.4	Least-adapted genes	GO:0016020, GO:0016021
Sp	SPAL_0001641600.1	0.332583	0.346847	Least-adapted genes
Sp	SPAL_0001195700.1	0.332641	0.362376	Least-adapted genes
Sp	SPAL_0000542100.1	0.33267	0.372807	Least-adapted genes	GO:0004252, GO:0016021, GO:0016020, GO:0006508
Sp	SPAL_0001476200.1	0.332674	0.418631	Least-adapted genes
Sp	SPAL_0000803850.1	0.332707	0.381232	Least-adapted genes
Sp	SPAL_0000388300.1	0.332743	0.39726	Least-adapted genes	GO:0000439, GO:0006289, GO:0006355
Sp	SPAL_0000648700.1	0.332889	0.406393	Least-adapted genes
Sp	SPAL_0000187600.1	0.332955	0.378486	Least-adapted genes	GO:0017053
Sp	SPAL_0001539400.1	0.333078	0.365931	Least-adapted genes
Sp	SPAL_0001397000.1	0.33317	0.411523	Least-adapted genes
Sp	SPAL_0000648800.1	0.33358	0.373626	Least-adapted genes
Sp	SPAL_0000565900.1	0.33402	0.421053	Least-adapted genes
Sp	SPAL_0001111600.1	0.334026	0.47205	Least-adapted genes
Sp	SPAL_0000065300.1	0.334512	0.395062	Least-adapted genes
Sp	SPAL_0000065400.1	0.334512	0.395062	Least-adapted genes
Sp	SPAL_0001272000.1	0.335218	0.449772	Least-adapted genes
Sp	SPAL_0001779100.1	0.33554	0.435484	Least-adapted genes	GO:0003677
Sp	SPAL_0001520800.1	0.335644	0.421976	Least-adapted genes
Sp	SPAL_0001574200.1	0.3358	0.409836	Least-adapted genes
Sp	SPAL_0001234050.1	0.336123	0.371429	Least-adapted genes
Sp	SPAL_0000258300.1	0.336135	0.340067	Least-adapted genes	GO:0016020, GO:0016021
Sp	SPAL_0000209000.1	0.336202	0.466667	Least-adapted genes
Sp	SPAL_0001479000.1	0.336257	0.35489	Least-adapted genes
Sp	SPAL_0001226300.1	0.336349	0.402516	Least-adapted genes	GO:0016020, GO:0016021
Sp	SPAL_0000612000.1	0.33691	0.441257	Least-adapted genes
Sp	SPAL_0001094400.1	0.336914	0.364198	Least-adapted genes	GO:0006310, GO:0003677, GO:0015074
Sp	SPAL_0000104300.1	0.337515	0.413174	Least-adapted genes	GO:0006338, GO:0003677, GO:0005634
Sp	SPAL_0001544500.1	0.337687	0.412104	Least-adapted genes	GO:0005515
Sp	SPAL_0000674725.1	0.338022	0.4	Least-adapted genes
Sp	SPAL_0000001900.1	0.338137	0.405263	Least-adapted genes
Sp	SPAL_0000349700.1	0.338211	0.418605	Least-adapted genes	GO:0005515
Sp	SPAL_0001069000.1	0.338221	0.43629	Least-adapted genes
Sp	SPAL_0000766584.1	0.33829	0.427928	Least-adapted genes
Sp	SPAL_0000250500.1	0.338461	0.43379	Least-adapted genes
Sp	SPAL_0001079700.1	0.338479	0.386588	Least-adapted genes
Sp	SPAL_0000123625.1	0.338577	0.387755	Least-adapted genes
Sp	SPAL_0001164000.1	0.338596	0.462585	Least-adapted genes
Sp	SPAL_0000329700.1	0.33877	0.434444	Least-adapted genes
Sp	SPAL_0001290500.1	0.33886	0.392555	Least-adapted genes
Sp	SPAL_0000532500.1	0.340389	0.380531	Least-adapted genes
Sp	SPAL_0001202600.1	0.340727	0.40625	Least-adapted genes
Sp	SPAL_0001393600.1	0.340877	0.441667	Least-adapted genes
Sp	SPAL_0000104800.1	0.341128	0.414286	Least-adapted genes
Sp	SPAL_0000311533.1	0.341302	0.442029	Least-adapted genes
Sp	SPAL_0000041600.1	0.341314	0.408935	Least-adapted genes
Sp	SPAL_0001604200.1	0.341323	0.433862	Least-adapted genes
Sp	SPAL_0000001400.1	0.341624	0.423676	Least-adapted genes
Sp	SPAL_0000015500.1	0.341722	0.376667	Least-adapted genes
Sp	SPAL_0001560830.1	0.341983	0.305747	Least-adapted genes
Sp	SPAL_0000808400.1	0.342348	0.405797	Least-adapted genes
Sp	SPAL_0001571200.1	0.342471	0.355705	Least-adapted genes	GO:0003676, GO:0003723
Sp	SPAL_0001304725.1	0.34325	0.386905	Least-adapted genes
Sp	SPAL_0000830400.1	0.343392	0.411565	Least-adapted genes
Sp	SPAL_0000531500.1	0.343717	0.395062	Least-adapted genes
Sp	SPAL_0001746000.1	0.344163	0.385714	Least-adapted genes
Sp	SPAL_0000208900.1	0.344271	0.425758	Least-adapted genes
Sp	SPAL_0001760400.1	0.344717	0.403417	Least-adapted genes
Sp	SPAL_0000104200.1	0.345244	0.421801	Least-adapted genes	GO:0016021, GO:0016020
Sp	SPAL_0000371275.1	0.34542	0.381766	Least-adapted genes
Sp	SPAL_0001227300.1	0.34583	0.408451	Least-adapted genes
Sp	SPAL_0000107000.1	0.34628	0.359848	Least-adapted genes
Sp	SPAL_0001632200.1	0.346693	0.415385	Least-adapted genes
Sp	SPAL_0001132350.1	0.34676	0.362963	Least-adapted genes
Sp	SPAL_0000185175.1	0.346857	0.409091	Least-adapted genes
Sp	SPAL_0000803900.1	0.347016	0.353909	Least-adapted genes
Sp	SPAL_0000514000.1	0.347152	0.402198	Least-adapted genes
Sp	SPAL_0000597825.1	0.347244	0.40885	Least-adapted genes
Sp	SPAL_0000627200.1	0.347417	0.349922	Least-adapted genes	GO:0004523, GO:0003676, GO:0090502
Sp	SPAL_0001283700.1	0.34747	0.379085	Least-adapted genes
Sp	SPAL_0000448400.1	0.347918	0.376047	Least-adapted genes
Sp	SPAL_0001140300.1	0.347925	0.415385	Least-adapted genes	GO:0015074, GO:0003676
Sp	SPAL_0001190000.1	0.348284	0.432624	Least-adapted genes
Sp	SPAL_0000350300.1	0.348383	0.429224	Least-adapted genes
Sp	SPAL_0001443400.1	0.348506	0.399202	Least-adapted genes
Sp	SPAL_0001572800.1	0.348742	0.419317	Least-adapted genes
Sp	SPAL_0000320800.1	0.348783	0.387037	Least-adapted genes
Sp	SPAL_0000909100.1	0.349149	0.414683	Least-adapted genes
Sp	SPAL_0000993400.1	0.349355	0.389961	Least-adapted genes	GO:0035312, GO:0004518, GO:0006281, GO:0090305
Sp	SPAL_0000205200.1	0.349406	0.426901	Least-adapted genes
Sp	SPAL_0001143800.1	0.349434	0.37234	Least-adapted genes
Sp	SPAL_0000376650.1	0.349813	0.376623	Least-adapted genes
Sp	SPAL_0001604100.1	0.35011	0.434959	Least-adapted genes	GO:0016020, GO:0016021
Sp	SPAL_0001724300.1	0.350579	0.365079	Least-adapted genes	GO:0016020, GO:0016021
Sp	SPAL_0000325500.1	0.350661	0.417219	Least-adapted genes
Sp	SPAL_0000618650.1	0.350811	0.390625	Least-adapted genes
Sp	SPAL_0000388600.1	0.350836	0.392067	Least-adapted genes	GO:0016787, GO:0004721, GO:0006470
Sp	SPAL_0001725450.1	0.350957	0.37927	Least-adapted genes
Sp	SPAL_0000558300.1	0.35121	0.400802	Least-adapted genes
Sp	SPAL_0000921200.1	0.351581	0.439153	Least-adapted genes
Sp	SPAL_0000034300.1	0.351662	0.389583	Least-adapted genes
Sp	SPAL_0001558200.1	0.351671	0.384201	Least-adapted genes
Sp	SPAL_0001399600.1	0.351738	0.372232	Least-adapted genes	GO:0005856
Sp	SPAL_0001495600.1	0.351801	0.380952	Least-adapted genes
Sp	SPAL_0000964200.1	0.352601	0.370115	Least-adapted genes
Sp	SPAL_0001093800.1	0.35274	0.398422	Least-adapted genes
Sp	SPAL_0001765600.1	0.352761	0.408602	Least-adapted genes
Sp	SPAL_0000080000.1	0.352952	0.425882	Least-adapted genes
Sp	SPAL_0001228400.1	0.353135	0.449686	Least-adapted genes
Sp	SPAL_0000792500.1	0.353228	0.402549	Least-adapted genes
Sp	SPAL_0000617600.1	0.353263	0.463918	Least-adapted genes
Sp	SPAL_0000665300.1	0.35378	0.37457	Least-adapted genes	GO:0016020, GO:0016021
Sp	SPAL_0000711600.1	0.354023	0.435453	Least-adapted genes
Sp	SPAL_0000696400.1	0.354093	0.414482	Least-adapted genes
Sp	SPAL_0000900200.1	0.354112	0.423645	Least-adapted genes	GO:0005840, GO:0006412, GO:0003735
Sp	SPAL_0001632100.1	0.35426	0.411966	Least-adapted genes
Sp	SPAL_0001123000.1	0.354289	0.387831	Least-adapted genes	GO:0015074, GO:0003676
Sp	SPAL_0001725000.1	0.354686	0.429553	Least-adapted genes
Sp	SPAL_0001659500.1	0.354801	0.376126	Least-adapted genes
Sp	SPAL_0000846400.1	0.355063	0.401478	Least-adapted genes
Sp	SPAL_0001403400.1	0.355138	0.408497	Least-adapted genes
Sp	SPAL_0001769600.1	0.35542	0.413333	Least-adapted genes
Sp	SPAL_0001080200.1	0.35545	0.386139	Least-adapted genes	GO:0005634, GO:0006260
Sp	SPAL_0001777800.1	0.35562	0.395522	Least-adapted genes
Sp	SPAL_0001566700.1	0.355684	0.349081	Least-adapted genes
Sp	SPAL_0000093200.1	0.355844	0.423868	Least-adapted genes	GO:0006627, GO:0008233, GO:0008236, GO:0016021, GO:0016020, GO:0006508, GO:0005739
Sp	SPAL_0000448500.1	0.355847	0.378378	Least-adapted genes
Sp	SPAL_0000350100.1	0.355863	0.378311	Least-adapted genes	GO:0006464, GO:0005524
Sp	SPAL_0000565500.1	0.355931	0.401709	Least-adapted genes	GO:0016020, GO:0016021
Sp	SPAL_0000852300.1	0.356151	0.374372	Least-adapted genes	GO:0003677, GO:0003676
Sp	SPAL_0001572100.1	0.356179	0.41247	Least-adapted genes
Sp	SPAL_0001010450.1	0.356198	0.286385	Least-adapted genes
Sp	SPAL_0000567500.1	0.356669	0.378788	Least-adapted genes
Sp	SPAL_0001121500.1	0.356833	0.405738	Least-adapted genes	GO:0003677
Sp	SPAL_0001116200.1	0.357535	0.387423	Least-adapted genes
Sp	SPAL_0000367900.1	0.357721	0.392936	Least-adapted genes
Sp	SPAL_0000435200.1	0.357798	0.399799	Least-adapted genes	GO:0003677
Sp	SPAL_0000051400.1	0.357898	0.393939	Least-adapted genes
Sp	SPAL_0001138350.1	0.357969	0.410256	Least-adapted genes
Sp	SPAL_0000817300.1	0.358012	0.423704	Least-adapted genes	GO:0008270, GO:0003676
Sp	SPAL_0001335800.1	0.358089	0.390476	Least-adapted genes
Sp	SPAL_0001181300.1	0.358929	0.424031	Least-adapted genes	GO:0004386
Sp	SPAL_0001162700.1	0.358964	0.406639	Least-adapted genes
Sp	SPAL_0001776000.1	0.359139	0.39782	Least-adapted genes
Sp	SPAL_0000855800.1	0.35928	0.40367	Least-adapted genes	GO:0003677, GO:0005634
Sp	SPAL_0000017800.1	0.35936	0.434109	Least-adapted genes	GO:0016020, GO:0016021
Sp	SPAL_0001450200.1	0.359751	0.393443	Least-adapted genes	GO:0016209, GO:0016491, GO:0055114, GO:0003677, GO:0005634, GO:0098869
Sp	SPAL_0000621975.1	0.359964	0.304487	Least-adapted genes
Sp	SPAL_0000959200.1	0.360181	0.419444	Least-adapted genes	GO:0008270, GO:0003676
Sp	SPAL_0000958900.1	0.360689	0.445808	Least-adapted genes
Sp	SPAL_0000958700.1	0.360792	0.387538	Least-adapted genes	GO:0015074, GO:0003676
Sp	SPAL_0001605700.1	0.361004	0.422576	Least-adapted genes
Sp	SPAL_0000032000.1	0.361252	0.41506	Least-adapted genes	GO:0046872
Sp	SPAL_0000349400.1	0.361299	0.426667	Least-adapted genes
Sp	SPAL_0001352450.1	0.361314	0.458689	Least-adapted genes	GO:0016020, GO:0016021
Sp	SPAL_0000190400.1	0.361696	0.36689	Least-adapted genes	GO:0016020, GO:0016021
Sp	SPAL_0001724800.1	0.361994	0.434896	Least-adapted genes
Sp	SPAL_0000900400.1	0.362027	0.417655	Least-adapted genes	GO:0016579, GO:0004843, GO:0016787
Sp	SPAL_0000739600.1	0.362086	0.375587	Least-adapted genes	GO:0000178, GO:0006396, GO:0003676
Sp	SPAL_0000806800.1	0.36211	0.364921	Least-adapted genes	GO:0016757, GO:0016020, GO:0016021
Sp	SPAL_0000604900.1	0.362548	0.349112	Least-adapted genes
Sp	SPAL_0000612475.1	0.362751	0.313725	Least-adapted genes
Sp	SPAL_0001767700.1	0.363048	0.374486	Least-adapted genes
Sp	SPAL_0000401000.1	0.363172	0.343109	Least-adapted genes	GO:0016757, GO:0016020, GO:0016021
Sp	SPAL_0000652900.1	0.363271	0.4	Least-adapted genes
Sp	SPAL_0000535600.1	0.363372	0.391039	Least-adapted genes	GO:0003676
Sp	SPAL_0001232400.1	0.363488	0.417127	Least-adapted genes
Sp	SPAL_0000539500.1	0.363721	0.399461	Least-adapted genes
Sp	SPAL_0001330500.1	0.363727	0.376328	Least-adapted genes	GO:0015074, GO:0003676
Sp	SPAL_0000566100.1	0.363742	0.399937	Least-adapted genes	GO:0008270, GO:0003676
Sp	SPAL_0000104700.1	0.363752	0.439153	Least-adapted genes
Sp	SPAL_0000881100.1	0.363805	0.230769	Least-adapted genes
Sp	SPAL_0000579900.1	0.363918	0.391111	Least-adapted genes
Sp	SPAL_0000351100.1	0.364041	0.415435	Least-adapted genes	GO:0004190, GO:0008270, GO:0003676, GO:0006508
Sp	SPAL_0001769800.1	0.364067	0.333333	Least-adapted genes
Sp	SPAL_0001646300.1	0.364165	0.432273	Least-adapted genes
Sp	SPAL_0000957700.1	0.364214	0.459016	Least-adapted genes
Sp	SPAL_0000542700.1	0.364216	0.429333	Least-adapted genes
Sp	SPAL_0001397900.1	0.364239	0.402516	Least-adapted genes
Sp	SPAL_0000206400.1	0.364418	0.381443	Least-adapted genes
Sp	SPAL_0001497200.1	0.364684	0.376437	Least-adapted genes	GO:0016020, GO:0016021
Sp	SPAL_0001221300.1	0.364756	0.431818	Least-adapted genes
Sp	SPAL_0000665700.1	0.364761	0.413153	Least-adapted genes
Sp	SPAL_0001543200.1	0.36488	0.408787	Least-adapted genes
Sp	SPAL_0000883000.1	0.36507	0.410394	Least-adapted genes
Sp	SPAL_0000253000.1	0.365098	0.380287	Least-adapted genes	GO:0004523, GO:0003676, GO:0090502
Sp	SPAL_0001547100.1	0.365268	0.396396	Least-adapted genes
Sp	SPAL_0001087300.1	0.365301	0.378641	Least-adapted genes
Sp	SPAL_0000579300.1	0.365416	0.400447	Least-adapted genes	GO:0006400, GO:0003723
Sp	SPAL_0000807700.1	0.365629	0.43025	Least-adapted genes	GO:0090730, GO:0004519, GO:0006364, GO:0090305
Sp	SPAL_0000090100.1	0.365683	0.347368	Least-adapted genes
Sp	SPAL_0000824300.2	0.366029	0.408191	Least-adapted genes
Sp	SPAL_0001419666.1	0.366061	0.394822	Least-adapted genes
Sp	SPAL_0001129300.1	0.366246	0.368421	Least-adapted genes
Sp	SPAL_0000664300.1	0.366309	0.355556	Least-adapted genes
Sp	SPAL_0001766200.1	0.366326	0.402985	Least-adapted genes
Sp	SPAL_0000147100.1	0.366347	0.42735	Least-adapted genes
Sp	SPAL_0000089900.1	0.366401	0.378479	Least-adapted genes
Sp	SPAL_0001212800.1	0.366549	0.406111	Least-adapted genes	GO:1902412, GO:0000070
Sp	SPAL_0000436400.1	0.366652	0.409524	Least-adapted genes
Sp	SPAL_0000900000.1	0.366817	0.349908	Least-adapted genes	GO:0016592, GO:0006357, GO:0003712, GO:0005634
Sp	SPAL_0001726400.1	0.366871	0.442105	Least-adapted genes
Sp	SPAL_0001710200.1	0.366975	0.383085	Least-adapted genes
Sp	SPAL_0001118800.1	0.367123	0.375502	Least-adapted genes
Sp	SPAL_0000602600.1	0.367359	0.423133	Least-adapted genes
Sp	SPAL_0000546450.1	0.367522	0.412022	Least-adapted genes
Sp	SPAL_0000851000.1	0.367667	0.411325	Least-adapted genes
Sp	SPAL_0000134500.1	0.367672	0.406321	Least-adapted genes	GO:0004523, GO:0015074, GO:0003676, GO:0090502
Sp	SPAL_0001364800.1	0.368222	0.373134	Least-adapted genes
Sp	SPAL_0000406100.1	0.368275	0.333333	Least-adapted genes
Sp	SPAL_0000852700.1	0.368332	0.418478	Least-adapted genes
Sp	SPAL_0000721600.1	0.368362	0.36893	Least-adapted genes	GO:0004523, GO:0015074, GO:0003676, GO:0090502
Sp	SPAL_0000980670.1	0.368417	0.382114	Least-adapted genes
Sp	SPAL_0000005300.1	0.368528	0.362649	Least-adapted genes	GO:0016579, GO:0006511, GO:0004843, GO:0016787, GO:0006508, GO:0008233, GO:0008234, GO:0036459
Sp	SPAL_0001419633.1	0.368682	0.408521	Least-adapted genes
Sp	SPAL_0000900300.1	0.368731	0.411458	Least-adapted genes
Sp	SPAL_0001325400.1	0.368802	0.333333	Least-adapted genes
Sp	SPAL_0001673100.1	0.368918	0.371212	Least-adapted genes	GO:0005758
Sp	SPAL_0001537400.1	0.369041	0.381944	Least-adapted genes
Sp	SPAL_0000908800.1	0.369145	0.358255	Least-adapted genes	GO:0000077, GO:0042025
Sp	SPAL_0000517000.1	0.369199	0.389549	Least-adapted genes
Sp	SPAL_0000327300.1	0.369351	0.407971	Least-adapted genes
Sp	SPAL_0001449000.1	0.369466	0.389523	Least-adapted genes	GO:0003677
Sp	SPAL_0000068700.1	0.369502	0.369599	Least-adapted genes	GO:0004523, GO:0015074, GO:0003676, GO:0090502
Sp	SPAL_0001505200.1	0.369679	0.295833	Least-adapted genes	GO:0016020, GO:0016021
Sp	SPAL_0000448925.1	0.369747	0.392405	Least-adapted genes
Sp	SPAL_0000799800.1	0.369793	0.403175	Least-adapted genes
Sp	SPAL_0001770900.1	0.369997	0.368056	Least-adapted genes
Sp	SPAL_0000814775.1	0.37	0.393162	Least-adapted genes
Sp	SPAL_0000689100.1	0.370018	0.374721	Least-adapted genes
Sp	SPAL_0000132800.1	0.370116	0.386047	Least-adapted genes	GO:0015074, GO:0003676
Sp	SPAL_0001337500.1	0.370158	0.35958	Least-adapted genes
Sp	SPAL_0001036100.1	0.370254	0.345479	Least-adapted genes	GO:0016791, GO:0016020, GO:0016021, GO:0016311
Sp	SPAL_0000186400.1	0.370413	0.4	Least-adapted genes	GO:0046983, GO:0003899, GO:0006351
Sp	SPAL_0000446300.1	0.370573	0.469751	Least-adapted genes
Sp	SPAL_0001093000.1	0.370584	0.379747	Least-adapted genes
Sp	SPAL_0000493700.1	0.370643	0.382166	Least-adapted genes
Sp	SPAL_0001063800.1	0.370705	0.394872	Least-adapted genes	GO:0016020, GO:0016021
Sp	SPAL_0000400900.1	0.370919	0.354167	Least-adapted genes
Sp	SPAL_0001202966.1	0.37092	0.36689	Least-adapted genes
Sp	SPAL_0001490600.1	0.371088	0.399182	Least-adapted genes
Sp	SPAL_0000782800.1	0.371325	0.379274	Least-adapted genes
Sp	SPAL_0000075800.1	0.371361	0.425365	Least-adapted genes
Sp	SPAL_0000628200.1	0.371665	0.360215	Least-adapted genes
Sp	SPAL_0000034400.1	0.371951	0.378446	Least-adapted genes
Sp	SPAL_0000543000.1	0.372165	0.436631	Least-adapted genes
Sp	SPAL_0001283900.1	0.372245	0.393962	Least-adapted genes	GO:0015074, GO:0008270, GO:0003676
Sp	SPAL_0001094300.1	0.372388	0.427083	Least-adapted genes
Sp	SPAL_0000014900.1	0.372555	0.416213	Least-adapted genes
Sp	SPAL_0000480700.1	0.372742	0.404543	Least-adapted genes	GO:0006310, GO:0004386, GO:0005524, GO:0003676, GO:0000166, GO:0016787, GO:0005634, GO:0003678, GO:0032508
Sp	SPAL_0000847200.1	0.372788	0.291667	Least-adapted genes	GO:0016020, GO:0016021
Sp	SPAL_0000846000.1	0.372944	0.381818	Least-adapted genes	GO:0008270, GO:0003676
Sp	SPAL_0001665400.2	0.373186	0.362069	Least-adapted genes
Sp	SPAL_0000344800.1	0.373306	0.345618	Least-adapted genes	GO:0007186, GO:0004930, GO:0016021, GO:0016020, GO:0007165
Sp	SPAL_0000425400.1	0.373329	0.343511	Least-adapted genes
Sp	SPAL_0000109900.1	0.373522	0.400709	Least-adapted genes
Sp	SPAL_0001781200.1	0.373555	0.366197	Least-adapted genes
Sp	SPAL_0000782200.1	0.373603	0.394097	Least-adapted genes

## Sheet: Sv
File S3. GeneIDs, Codon Adaptation Index (CAI) values, fractional GC content, and GO term accession number of the 2% of genes with the highest and lowest CAI values for each Strongyloides species and C. elegans
Species	Gene ID	CAI by genus-specific usage rule	GC	Description	GO term ID
Sv	SVE_2005100.1	0.801102	0.30137	Most-adapted genes
Sv	SVE_1736400.1	0.796317	0.352713	Most-adapted genes	GO:0000062
Sv	SVE_0867700.1	0.775375	0.347095	Most-adapted genes	GO:0009253, GO:0016998, GO:0003796
Sv	SVE_1774700.1	0.770297	0.291165	Most-adapted genes	GO:0008289
Sv	SVE_1903200.1	0.768104	0.333333	Most-adapted genes
Sv	SVE_1653100.1	0.763554	0.360656	Most-adapted genes
Sv	SVE_0351700.1	0.759173	0.292473	Most-adapted genes
Sv	SVE_0227400.1	0.757957	0.262222	Most-adapted genes
Sv	SVE_1804800.1	0.755448	0.467091	Most-adapted genes	GO:0042302, GO:0016020, GO:0016021
Sv	SVE_1159100.1	0.753863	0.285714	Most-adapted genes	GO:0006508, GO:0004222, GO:0008237
Sv	SVE_0000182450.1	0.753683	0.273504	Most-adapted genes	GO:0016020, GO:0016021
Sv	SVE_0522400.1	0.7535	0.269076	Most-adapted genes
Sv	SVE_0452900.1	0.753111	0.40192	Most-adapted genes	GO:0015935, GO:0003723, GO:0006412, GO:0003735
Sv	SVE_0047600.1	0.751939	0.283951	Most-adapted genes	GO:0016020, GO:0016021
Sv	SVE_1014900.1	0.751698	0.383929	Most-adapted genes	GO:0005840, GO:0006412, GO:0003735
Sv	SVE_1077000.1	0.751095	0.402778	Most-adapted genes
Sv	SVE_0814400.1	0.747552	0.253731	Most-adapted genes
Sv	SVE_0966300.1	0.746172	0.350831	Most-adapted genes	GO:0008061, GO:0005576
Sv	SVE_0533700.1	0.745747	0.351449	Most-adapted genes
Sv	SVE_0119200.1	0.745648	0.43578	Most-adapted genes	GO:0042302, GO:0016020, GO:0016021
Sv	SVE_0137300.1	0.745132	0.348148	Most-adapted genes
Sv	SVE_0209400.1	0.743184	0.526776	Most-adapted genes	GO:0042302, GO:0016020, GO:0016021
Sv	SVE_0066500.1	0.743099	0.405622	Most-adapted genes	GO:0005840, GO:0006412, GO:0003735
Sv	SVE_0001000200.1	0.742826	0.262626	Most-adapted genes
Sv	SVE_1982500.1	0.742386	0.365079	Most-adapted genes	GO:0008061, GO:0005576
Sv	SVE_1628000.1	0.741888	0.319088	Most-adapted genes
Sv	SVE_1617200.1	0.741637	0.416092	Most-adapted genes	GO:0015935, GO:0003723, GO:0005840, GO:0006412, GO:0003735
Sv	SVE_0144600.1	0.741464	0.339181	Most-adapted genes
Sv	SVE_0823900.1	0.741355	0.37037	Most-adapted genes	GO:0030246
Sv	SVE_0641300.1	0.740883	0.390782	Most-adapted genes	GO:0003756, GO:0045454, GO:0016853
Sv	SVE_0528500.1	0.740717	0.420904	Most-adapted genes	GO:0005840, GO:0006412, GO:0003735
Sv	SVE_1771600.1	0.740463	0.305842	Most-adapted genes
Sv	SVE_0779200.1	0.740399	0.35863	Most-adapted genes	GO:0008061, GO:0005576
Sv	SVE_0328500.1	0.739707	0.272358	Most-adapted genes
Sv	SVE_1895500.1	0.739564	0.398936	Most-adapted genes	GO:0005840, GO:0006412, GO:0003735
Sv	SVE_0794600.1	0.738968	0.437198	Most-adapted genes
Sv	SVE_1812700.1	0.73829	0.419872	Most-adapted genes	GO:0042025, GO:0000786, GO:0003677, GO:0046982, GO:0005634, GO:0005694
Sv	SVE_0867800.1	0.737524	0.37156	Most-adapted genes	GO:0009253, GO:0016998, GO:0003796
Sv	SVE_1341900.1	0.736595	0.535024	Most-adapted genes
Sv	SVE_0558900.1	0.736056	0.3663	Most-adapted genes	GO:0008289
Sv	SVE_0703900.1	0.735488	0.428571	Most-adapted genes
Sv	SVE_0526300.1	0.735347	0.385093	Most-adapted genes	GO:0005840, GO:0006412, GO:0003735
Sv	SVE_1866000.1	0.73528	0.37659	Most-adapted genes	GO:0005840, GO:0006412, GO:0003735
Sv	SVE_0481500.1	0.732876	0.387164	Most-adapted genes
Sv	SVE_0450600.1	0.732465	0.340967	Most-adapted genes	GO:0005840, GO:0006412, GO:0003735
Sv	SVE_2023700.1	0.731371	0.303571	Most-adapted genes
Sv	SVE_2025500.1	0.728793	0.248889	Most-adapted genes
Sv	SVE_0704400.1	0.727757	0.352673	Most-adapted genes	GO:0006520, GO:0016639, GO:0016491, GO:0055114
Sv	SVE_1964500.1	0.727693	0.320132	Most-adapted genes	GO:0016020, GO:0016021
Sv	SVE_0506800.1	0.727169	0.38133	Most-adapted genes	GO:0016459, GO:0003774
Sv	SVE_0525400.1	0.726509	0.4081	Most-adapted genes	GO:0005840, GO:0006412, GO:0003735
Sv	SVE_0306200.1	0.726273	0.347537	Most-adapted genes	GO:0016020, GO:0016021
Sv	SVE_0275000.1	0.725326	0.527412	Most-adapted genes	GO:0042302, GO:0016020, GO:0016021
Sv	SVE_0982100.1	0.724437	0.358696	Most-adapted genes
Sv	SVE_0340700.1	0.724089	0.368217	Most-adapted genes
Sv	SVE_0267700.1	0.723963	0.314815	Most-adapted genes	GO:0008191, GO:0010951
Sv	SVE_1696200.1	0.723787	0.314286	Most-adapted genes
Sv	SVE_0581800.1	0.723506	0.389408	Most-adapted genes	GO:0005840, GO:0006412, GO:0003735
Sv	SVE_0040500.1	0.723264	0.396552	Most-adapted genes	GO:0033180, GO:0046961, GO:1902600, GO:0046034, GO:0005524
Sv	SVE_0481600.1	0.722949	0.399151	Most-adapted genes
Sv	SVE_0533100.1	0.722291	0.34375	Most-adapted genes
Sv	SVE_0056400.1	0.721894	0.385148	Most-adapted genes	GO:0016459, GO:0051015, GO:0003774, GO:0005524, GO:0000166, GO:0003779
Sv	SVE_1841400.1	0.721813	0.365123	Most-adapted genes	GO:0004332, GO:0006096, GO:0003824, GO:0016829
Sv	SVE_0448200.1	0.721168	0.317881	Most-adapted genes	GO:0030246
Sv	SVE_0041600.1	0.721024	0.274914	Most-adapted genes
Sv	SVE_0357200.1	0.720886	0.345992	Most-adapted genes	GO:0005509
Sv	SVE_1015700.1	0.720868	0.441176	Most-adapted genes	GO:0015935, GO:0003723, GO:0005840, GO:0006412, GO:0003735, GO:1990904
Sv	SVE_0470700.1	0.720713	0.375342	Most-adapted genes	GO:0004332, GO:0006096, GO:0003824, GO:0016829
Sv	SVE_0053100.1	0.719959	0.402299	Most-adapted genes	GO:0005347, GO:0055085, GO:0016020, GO:0016021, GO:0015867
Sv	SVE_0079900.1	0.71904	0.394673	Most-adapted genes
Sv	SVE_0187200.1	0.718852	0.392966	Most-adapted genes	GO:0004013, GO:0016787, GO:0006730
Sv	SVE_0278200.1	0.718809	0.233716	Most-adapted genes
Sv	SVE_0105400.1	0.718728	0.371638	Most-adapted genes	GO:0006102, GO:0004450, GO:0016616, GO:0051287, GO:0000287, GO:0055114, GO:0046872, GO:0006099, GO:0016491
Sv	SVE_0000542450.1	0.718677	0.434343	Most-adapted genes	GO:0005840, GO:0006412, GO:0003735
Sv	SVE_0145600.1	0.718365	0.375244	Most-adapted genes	GO:0006006, GO:0051287, GO:0050661, GO:0016620, GO:0055114, GO:0000166, GO:0006096, GO:0016491, GO:0004365
Sv	SVE_0715000.1	0.717926	0.33461	Most-adapted genes
Sv	SVE_1653000.1	0.717796	0.41164	Most-adapted genes	GO:0042254, GO:0005840
Sv	SVE_0525300.1	0.717694	0.320988	Most-adapted genes
Sv	SVE_0367200.1	0.717687	0.380208	Most-adapted genes	GO:0005840, GO:0006412, GO:0003735
Sv	SVE_1843100.1	0.717504	0.314749	Most-adapted genes	GO:0004645, GO:0008184, GO:0005975, GO:0030170, GO:0016740, GO:0016757, GO:0102250, GO:0102499
Sv	SVE_0867600.1	0.717127	0.365443	Most-adapted genes	GO:0009253, GO:0016998, GO:0003796
Sv	SVE_1716400.1	0.716892	0.4	Most-adapted genes	GO:0003723, GO:0003676, GO:0005840, GO:0006412, GO:0003735
Sv	SVE_1971400.1	0.71656	0.333333	Most-adapted genes	GO:0005509, GO:0005515
Sv	SVE_0819900.1	0.716235	0.362869	Most-adapted genes	GO:0006556, GO:0004478, GO:0005524, GO:0016740, GO:0000166, GO:0046872, GO:0006730
Sv	SVE_0436000.1	0.716113	0.375421	Most-adapted genes	GO:0004190, GO:0006508, GO:0016787, GO:0008233
Sv	SVE_0940100.1	0.715709	0.341787	Most-adapted genes	GO:0003755, GO:0016020, GO:0016021, GO:0016853, GO:0000413
Sv	SVE_0029100.1	0.715001	0.470156	Most-adapted genes	GO:0042302, GO:0016020, GO:0016021
Sv	SVE_1938900.1	0.714787	0.413953	Most-adapted genes	GO:0005840, GO:0006412, GO:0003735
Sv	SVE_0254300.1	0.714766	0.264151	Most-adapted genes	GO:0015074, GO:0003676
Sv	SVE_0995800.1	0.713681	0.340909	Most-adapted genes	GO:0005853, GO:0006414, GO:0003746, GO:0006412
Sv	SVE_1897900.1	0.713215	0.321839	Most-adapted genes	GO:0005515
Sv	SVE_0694700.1	0.713187	0.471545	Most-adapted genes
Sv	SVE_1636400.1	0.712811	0.301724	Most-adapted genes
Sv	SVE_1949600.1	0.71255	0.391149	Most-adapted genes	GO:0006101, GO:0004108, GO:0046912, GO:0006099, GO:0016740
Sv	SVE_0441100.1	0.712506	0.370614	Most-adapted genes	GO:0005509
Sv	SVE_1021400.1	0.712462	0.423423	Most-adapted genes	GO:0005840, GO:0006412, GO:0003735
Sv	SVE_1632600.1	0.712045	0.303977	Most-adapted genes	GO:0006629
Sv	SVE_0577600.1	0.711752	0.529605	Most-adapted genes	GO:0042302, GO:0016020, GO:0016021
Sv	SVE_0855300.1	0.711416	0.453947	Most-adapted genes	GO:0005840, GO:0006412, GO:0003735
Sv	SVE_0864200.1	0.71137	0.364177	Most-adapted genes	GO:0003824
Sv	SVE_0786800.1	0.711361	0.5	Most-adapted genes	GO:0042302, GO:0016020, GO:0016021
Sv	SVE_1621600.1	0.710782	0.247788	Most-adapted genes
Sv	SVE_0340600.1	0.710744	0.356061	Most-adapted genes
Sv	SVE_1663600.1	0.710395	0.21	Most-adapted genes
Sv	SVE_0615900.1	0.7103	0.387821	Most-adapted genes	GO:0042025, GO:0000786, GO:0003677, GO:0046982, GO:0005634, GO:0005694
Sv	SVE_0590600.1	0.708415	0.341799	Most-adapted genes	GO:0008233, GO:0004867, GO:0010951, GO:0006508
Sv	SVE_0834400.1	0.708223	0.339708	Most-adapted genes	GO:0005737, GO:0051536, GO:0051539
Sv	SVE_0000699050.1	0.708197	0.428571	Most-adapted genes
Sv	SVE_0451600.1	0.70814	0.425926	Most-adapted genes	GO:0033179, GO:0033177, GO:1902600, GO:0015078, GO:0016020, GO:0016021, GO:0006811, GO:0005773, GO:0005774
Sv	SVE_0817300.1	0.707711	0.426573	Most-adapted genes
Sv	SVE_0825900.1	0.707595	0.318966	Most-adapted genes	GO:0004602, GO:0006979, GO:0055114, GO:0016491, GO:0098869, GO:0004601
Sv	SVE_1743200.1	0.707349	0.375494	Most-adapted genes
Sv	SVE_0446100.1	0.70729	0.337408	Most-adapted genes	GO:0008234, GO:0006508, GO:0016787, GO:0008233
Sv	SVE_0936800.1	0.707163	0.405157	Most-adapted genes	GO:0005840, GO:0006412, GO:0003735
Sv	SVE_0178900.1	0.706458	0.263333	Most-adapted genes
Sv	SVE_1077600.1	0.706311	0.415504	Most-adapted genes
Sv	SVE_0660600.1	0.705891	0.333333	Most-adapted genes
Sv	SVE_0053500.1	0.705891	0.365079	Most-adapted genes
Sv	SVE_1857500.1	0.705285	0.429412	Most-adapted genes
Sv	SVE_1714300.1	0.705124	0.336391	Most-adapted genes	GO:0016020, GO:0016021
Sv	SVE_1997900.1	0.704679	0.267442	Most-adapted genes
Sv	SVE_2009900.1	0.704672	0.233766	Most-adapted genes
Sv	SVE_0158700.1	0.704662	0.315018	Most-adapted genes	GO:0016020, GO:0016021
Sv	SVE_0018500.1	0.704508	0.419048	Most-adapted genes	GO:0015934, GO:0005840, GO:0006412, GO:0003735
Sv	SVE_0965900.1	0.704255	0.389671	Most-adapted genes	GO:0006122, GO:0008121, GO:0016020, GO:0005739, GO:0055114, GO:0005743, GO:0070469
Sv	SVE_0283900.1	0.704243	0.349633	Most-adapted genes	GO:0006520, GO:0008483, GO:0009058, GO:0030170, GO:0003824, GO:0016740, GO:0004069
Sv	SVE_0992300.1	0.704197	0.39273	Most-adapted genes
Sv	SVE_0946300.1	0.703898	0.387534	Most-adapted genes
Sv	SVE_0323900.1	0.703877	0.241453	Most-adapted genes	GO:0035658, GO:0016192
Sv	SVE_0345200.1	0.703644	0.342884	Most-adapted genes	GO:0004521, GO:0090502
Sv	SVE_1586200.1	0.703505	0.51766	Most-adapted genes	GO:0042302, GO:0016020, GO:0016021
Sv	SVE_0579400.1	0.703277	0.538606	Most-adapted genes
Sv	SVE_0972100.1	0.70311	0.328571	Most-adapted genes	GO:0015450, GO:0006605, GO:0015031, GO:0006886, GO:0016020, GO:0016021, GO:0071806
Sv	SVE_1895800.1	0.70252	0.380952	Most-adapted genes	GO:0016471, GO:0042626, GO:1902600, GO:0006811
Sv	SVE_1712500.1	0.702333	0.348066	Most-adapted genes	GO:0008289
Sv	SVE_1831300.1	0.702186	0.385512	Most-adapted genes	GO:0004613, GO:0017076, GO:0004611, GO:0005525, GO:0006094
Sv	SVE_1812800.1	0.701889	0.447689	Most-adapted genes	GO:0000786, GO:0003677, GO:0046982, GO:0005634, GO:0005694
Sv	SVE_0414300.2	0.701827	0.312312	Most-adapted genes	GO:0005515, GO:0046872
Sv	SVE_0219100.1	0.701395	0.356605	Most-adapted genes	GO:0016829, GO:0045239, GO:0006106, GO:0004333, GO:0006099, GO:0003824
Sv	SVE_0300800.1	0.701363	0.337398	Most-adapted genes	GO:0005509
Sv	SVE_0566800.1	0.700946	0.297101	Most-adapted genes	GO:0008289
Sv	SVE_1602100.1	0.700482	0.232843	Most-adapted genes	GO:0005615
Sv	SVE_0889100.1	0.700326	0.246528	Most-adapted genes
Sv	SVE_1616700.1	0.70028	0.330447	Most-adapted genes
Sv	SVE_1736700.1	0.700014	0.39851	Most-adapted genes	GO:0032559, GO:0045261, GO:0046933, GO:1902600, GO:0046034, GO:0015986, GO:0005524, GO:0000166, GO:0006811, GO:0006754
Sv	SVE_1774900.1	0.699348	0.418391	Most-adapted genes
Sv	SVE_0834800.1	0.699167	0.311321	Most-adapted genes	GO:0072321, GO:0005758, GO:0046872, GO:0005739, GO:0015031, GO:0005743
Sv	SVE_1041000.1	0.698761	0.352335	Most-adapted genes
Sv	SVE_1932000.1	0.698759	0.307692	Most-adapted genes
Sv	SVE_1763000.1	0.698702	0.217054	Most-adapted genes	GO:0016020, GO:0016021
Sv	SVE_0119700.1	0.698644	0.316777	Most-adapted genes	GO:0006629, GO:0016627, GO:0016020, GO:0016021, GO:0055114
Sv	SVE_0573300.1	0.698579	0.485876	Most-adapted genes
Sv	SVE_0608300.1	0.698284	0.383442	Most-adapted genes	GO:0005740, GO:0016021, GO:0016020, GO:0046872, GO:0005739, GO:0055114, GO:0006099, GO:0005743
Sv	SVE_0825300.1	0.698025	0.345274	Most-adapted genes	GO:0004459, GO:0019752, GO:0016616, GO:0005975, GO:0005737, GO:0016491, GO:0003824, GO:0055114
Sv	SVE_0559800.1	0.69796	0.331263	Most-adapted genes
Sv	SVE_1722600.1	0.697848	0.401361	Most-adapted genes	GO:0005840, GO:0006412, GO:0003735
Sv	SVE_1648800.1	0.69771	0.289562	Most-adapted genes
Sv	SVE_1932300.1	0.697693	0.376812	Most-adapted genes	GO:0006801, GO:0004784, GO:0046872, GO:0055114, GO:0016491, GO:0019430
Sv	SVE_0505600.1	0.697167	0.196643	Most-adapted genes
Sv	SVE_1648100.1	0.697081	0.338361	Most-adapted genes
Sv	SVE_0345400.1	0.697005	0.421245	Most-adapted genes
Sv	SVE_1846100.1	0.696689	0.418048	Most-adapted genes	GO:0015934, GO:0005840, GO:0006412, GO:0003735
Sv	SVE_0493300.1	0.696575	0.229017	Most-adapted genes
Sv	SVE_0889000.1	0.69632	0.289562	Most-adapted genes
Sv	SVE_1622100.1	0.69617	0.363503	Most-adapted genes	GO:0005200, GO:0005874, GO:0007017, GO:0005525, GO:0003924, GO:0000166, GO:0005737, GO:0005856, GO:0007010
Sv	SVE_1058000.1	0.695604	0.290598	Most-adapted genes
Sv	SVE_1923300.1	0.695501	0.33584	Most-adapted genes
Sv	SVE_0770800.1	0.695443	0.268362	Most-adapted genes	GO:0005524
Sv	SVE_0003800.1	0.695287	0.356798	Most-adapted genes
Sv	SVE_0359900.1	0.695102	0.344671	Most-adapted genes
Sv	SVE_1766300.1	0.695098	0.369909	Most-adapted genes
Sv	SVE_1846300.1	0.694985	0.419075	Most-adapted genes	GO:0005840, GO:0006412, GO:0003735
Sv	SVE_0285700.1	0.694938	0.413043	Most-adapted genes	GO:0003796
Sv	SVE_0473400.1	0.694795	0.410401	Most-adapted genes	GO:0045261, GO:0046933, GO:1902600, GO:0046034, GO:0015986, GO:0005524, GO:0000166, GO:0006754
Sv	SVE_0102000.1	0.694758	0.300741	Most-adapted genes
Sv	SVE_1151500.1	0.694657	0.310163	Most-adapted genes
Sv	SVE_1823600.1	0.694607	0.427115	Most-adapted genes	GO:0005515
Sv	SVE_0143800.1	0.694598	0.37894	Most-adapted genes	GO:0033180, GO:1902600, GO:0046034, GO:0005524, GO:0006811
Sv	SVE_1884900.1	0.694434	0.342067	Most-adapted genes
Sv	SVE_0480100.1	0.694433	0.328638	Most-adapted genes
Sv	SVE_0633200.1	0.694203	0.292793	Most-adapted genes
Sv	SVE_1900600.1	0.694131	0.355666	Most-adapted genes	GO:0046314, GO:0004111, GO:0016772, GO:0016301, GO:0003824, GO:0016740, GO:0000166, GO:0005524, GO:0016310
Sv	SVE_0942700.1	0.694025	0.545238	Most-adapted genes
Sv	SVE_1618900.1	0.693572	0.258706	Most-adapted genes
Sv	SVE_0500100.1	0.693564	0.398333	Most-adapted genes	GO:0005840, GO:0006412, GO:0003735
Sv	SVE_1583900.1	0.693154	0.352381	Most-adapted genes	GO:0016020, GO:0016021
Sv	SVE_0317300.1	0.69298	0.404342	Most-adapted genes	GO:0005525
Sv	SVE_0597000.1	0.692966	0.260563	Most-adapted genes
Sv	SVE_0942800.1	0.69288	0.367067	Most-adapted genes	GO:0006813, GO:0008556, GO:0000166, GO:0005524, GO:0016021, GO:0016020, GO:0046872, GO:0006811, GO:0071805
Sv	SVE_0575200.1	0.692731	0.332397	Most-adapted genes	GO:0006796, GO:0004427, GO:0005737, GO:0000287
Sv	SVE_1812400.1	0.69193	0.364659	Most-adapted genes
Sv	SVE_0730900.1	0.69184	0.287281	Most-adapted genes	GO:0003676
Sv	SVE_0000661550.1	0.691746	0.246377	Most-adapted genes	GO:0016020, GO:0016021
Sv	SVE_1616600.1	0.691665	0.301587	Most-adapted genes	GO:0006468, GO:0005524, GO:0004672
Sv	SVE_1727700.1	0.691622	0.422713	Most-adapted genes
Sv	SVE_0463100.1	0.690911	0.377649	Most-adapted genes	GO:0030060, GO:0019752, GO:0016616, GO:0006099, GO:0005975, GO:0016491, GO:0003824, GO:0055114
Sv	SVE_0572700.1	0.690803	0.353649	Most-adapted genes	GO:0005200, GO:0005874, GO:0007017, GO:0005525, GO:0003924, GO:0000166, GO:0005737, GO:0005856, GO:0007010
Sv	SVE_0688300.1	0.690733	0.348649	Most-adapted genes	GO:0006629, GO:0016020, GO:0016021
Sv	SVE_0485400.1	0.690656	0.447447	Most-adapted genes
Sv	SVE_0100800.1	0.69062	0.296296	Most-adapted genes	GO:0016020, GO:0016021
Sv	SVE_0815400.1	0.690606	0.354776	Most-adapted genes	GO:0005615
Sv	SVE_1036100.1	0.690465	0.233333	Most-adapted genes
Sv	SVE_1870300.1	0.690257	0.350365	Most-adapted genes	GO:0005509
Sv	SVE_0417100.1	0.69022	0.372093	Most-adapted genes	GO:0015031, GO:0016020, GO:0016021
Sv	SVE_0258400.1	0.690097	0.254717	Most-adapted genes
Sv	SVE_1654200.1	0.689939	0.334249	Most-adapted genes
Sv	SVE_1318000.1	0.689793	0.225166	Most-adapted genes
Sv	SVE_1856000.1	0.689651	0.519493	Most-adapted genes	GO:0042302, GO:0016020, GO:0016021
Sv	SVE_1005800.1	0.689607	0.370927	Most-adapted genes	GO:0003779
Sv	SVE_0004500.1	0.689531	0.295488	Most-adapted genes	GO:0006508, GO:0004222, GO:0008237
Sv	SVE_1699500.1	0.689096	0.374468	Most-adapted genes
Sv	SVE_0328700.1	0.68888	0.300601	Most-adapted genes
Sv	SVE_1251500.1	0.688877	0.32381	Most-adapted genes
Sv	SVE_0223300.1	0.688665	0.291667	Most-adapted genes
Sv	SVE_1076000.1	0.688647	0.308807	Most-adapted genes
Sv	SVE_0356300.1	0.688646	0.308772	Most-adapted genes
Sv	SVE_0911500.1	0.688138	0.294521	Most-adapted genes
Sv	SVE_1683700.1	0.688082	0.246753	Most-adapted genes
Sv	SVE_0424400.1	0.688064	0.3919	Most-adapted genes	GO:0042026, GO:0006457, GO:0005524
Sv	SVE_0365600.1	0.688029	0.369892	Most-adapted genes	GO:0005743, GO:0005347, GO:0022857, GO:0055085, GO:0016020, GO:0016021, GO:0015867
Sv	SVE_1678100.1	0.687706	0.39	Most-adapted genes
Sv	SVE_0021500.1	0.687663	0.374667	Most-adapted genes	GO:0006096, GO:0004807, GO:0003824, GO:0006094, GO:0016853
Sv	SVE_0364400.1	0.687427	0.318945	Most-adapted genes	GO:0009235
Sv	SVE_0555800.1	0.687348	0.417497	Most-adapted genes	GO:0005743, GO:0005347, GO:0022857, GO:0055085, GO:0016020, GO:0016021, GO:0015867
Sv	SVE_0634900.1	0.687301	0.331835	Most-adapted genes	GO:0008483, GO:0030170, GO:0003824
Sv	SVE_0946500.1	0.687128	0.263158	Most-adapted genes	GO:0008080
Sv	SVE_0113100.1	0.686665	0.367424	Most-adapted genes	GO:0005861
Sv	SVE_0131700.1	0.686605	0.33	Most-adapted genes
Sv	SVE_0179000.1	0.686102	0.253444	Most-adapted genes
Sv	SVE_0020900.1	0.686084	0.329268	Most-adapted genes	GO:0042721, GO:0042719, GO:0045039, GO:0046872, GO:0005739, GO:0015031
Sv	SVE_0123700.1	0.685757	0.436853	Most-adapted genes	GO:0042302, GO:0016020, GO:0016021
Sv	SVE_0815500.1	0.685715	0.365079	Most-adapted genes	GO:0005615
Sv	SVE_1044600.1	0.685631	0.319923	Most-adapted genes
Sv	SVE_0809400.1	0.685587	0.494737	Most-adapted genes
Sv	SVE_0346900.1	0.685492	0.309469	Most-adapted genes	GO:0008233, GO:0006508
Sv	SVE_0983000.1	0.685481	0.501567	Most-adapted genes	GO:0042302, GO:0016020, GO:0016021
Sv	SVE_0890000.1	0.685249	0.280374	Most-adapted genes	GO:0006662, GO:0015035, GO:0045454, GO:0055114
Sv	SVE_0350700.1	0.685146	0.332034	Most-adapted genes
Sv	SVE_0280000.1	0.685034	0.354167	Most-adapted genes	GO:0006430, GO:0004824, GO:0006418, GO:0004812, GO:0005737, GO:0000166, GO:0005524
Sv	SVE_0310900.1	0.684909	0.349815	Most-adapted genes	GO:0005509, GO:0005515
Sv	SVE_0580800.1	0.684824	0.409326	Most-adapted genes	GO:0015935, GO:0019843, GO:0003723, GO:0006412, GO:0003735, GO:0005840
Sv	SVE_0728800.2	0.684794	0.361039	Most-adapted genes
Sv	SVE_1985300.1	0.684767	0.340543	Most-adapted genes	GO:0051082, GO:0006457, GO:0005524
Sv	SVE_1701400.1	0.684503	0.325648	Most-adapted genes
Sv	SVE_0717100.2	0.684467	0.417625	Most-adapted genes	GO:0006937, GO:0005861
Sv	SVE_0290500.1	0.684373	0.274775	Most-adapted genes
Sv	SVE_1759800.1	0.684223	0.343256	Most-adapted genes	GO:0016459, GO:0051015, GO:0003774, GO:0005524, GO:0000166, GO:0003779
Sv	SVE_0789800.1	0.684021	0.27957	Most-adapted genes	GO:0016705, GO:0005506, GO:0020037, GO:0055114
Sv	SVE_0536600.1	0.684016	0.342183	Most-adapted genes
Sv	SVE_1573500.1	0.683833	0.371901	Most-adapted genes
Sv	SVE_0854900.1	0.683642	0.401848	Most-adapted genes
Sv	SVE_0095600.1	0.683536	0.337607	Most-adapted genes	GO:0030246
Sv	SVE_0268800.1	0.683503	0.247191	Most-adapted genes
Sv	SVE_0521800.1	0.683425	0.341158	Most-adapted genes	GO:0005525, GO:0003924
Sv	SVE_0040700.1	0.683397	0.343685	Most-adapted genes	GO:0046034
Sv	SVE_1603700.1	0.683376	0.406977	Most-adapted genes	GO:0015935, GO:0005840, GO:0006412, GO:0003735, GO:0005737, GO:0022627, GO:0000028
Sv	SVE_1665800.1	0.683368	0.3129	Most-adapted genes
Sv	SVE_0322500.1	0.683331	0.492908	Most-adapted genes
Sv	SVE_0101400.1	0.683181	0.390728	Most-adapted genes
Sv	SVE_0024800.1	0.683123	0.335802	Most-adapted genes
Sv	SVE_0909300.1	0.682834	0.224843	Most-adapted genes
Sv	SVE_1453100.1	0.68259	0.249057	Most-adapted genes
Sv	SVE_1087500.1	0.682319	0.258824	Most-adapted genes	GO:0006508, GO:0004222, GO:0008237
Sv	SVE_1118100.1	0.682193	0.263889	Most-adapted genes
Sv	SVE_0521400.1	0.682115	0.312305	Most-adapted genes	GO:0008234, GO:0006508
Sv	SVE_1735800.1	0.682074	0.374389	Most-adapted genes	GO:0006006, GO:0051287, GO:0050661, GO:0016620, GO:0055114, GO:0000166, GO:0006096, GO:0016491, GO:0004365
Sv	SVE_1980100.1	0.68193	0.271557	Most-adapted genes
Sv	SVE_0327300.1	0.681729	0.275	Most-adapted genes
Sv	SVE_0873400.1	0.681712	0.261333	Most-adapted genes
Sv	SVE_0071400.1	0.681707	0.432692	Most-adapted genes	GO:0042025, GO:0000786, GO:0003677, GO:0046982, GO:0005634, GO:0005694
Sv	SVE_1902500.1	0.681669	0.413333	Most-adapted genes
Sv	SVE_1860200.1	0.681518	0.253165	Most-adapted genes
Sv	SVE_0024100.1	0.681133	0.372745	Most-adapted genes	GO:0004148, GO:0016668, GO:0045454, GO:0016491, GO:0055114, GO:0050660, GO:0000166
Sv	SVE_1831900.1	0.681087	0.359649	Most-adapted genes	GO:0043231, GO:0051537, GO:0016020, GO:0016021
Sv	SVE_0978300.1	0.68102	0.316667	Most-adapted genes	GO:0016020, GO:0016021
Sv	SVE_0866200.1	0.680861	0.247917	Most-adapted genes
Sv	SVE_0248000.1	0.680832	0.430556	Most-adapted genes
Sv	SVE_1606400.1	0.680756	0.349376	Most-adapted genes	GO:0005515
Sv	SVE_0187700.1	0.680683	0.423104	Most-adapted genes	GO:0005200, GO:0005874, GO:0007017, GO:0005525, GO:0003924, GO:0000166, GO:0007010
Sv	SVE_0623100.1	0.680512	0.347368	Most-adapted genes	GO:0006689, GO:0008047, GO:0043085
Sv	SVE_1417700.1	0.680377	0.254125	Most-adapted genes
Sv	SVE_0936600.1	0.680246	0.301961	Most-adapted genes
Sv	SVE_0879000.1	0.680219	0.266667	Most-adapted genes
Sv	SVE_0569300.1	0.680145	0.337662	Most-adapted genes	GO:0005840, GO:0006412, GO:0003735, GO:0016020, GO:0016021
Sv	SVE_1286400.1	0.680138	0.296296	Most-adapted genes
Sv	SVE_0983800.1	0.679978	0.333333	Most-adapted genes
Sv	SVE_1577600.1	0.679898	0.367906	Most-adapted genes	GO:0016620, GO:0016491, GO:0055114
Sv	SVE_1011300.1	0.679836	0.300725	Most-adapted genes	GO:0008234, GO:0006508, GO:0016787, GO:0008233
Sv	SVE_1884000.1	0.67977	0.395664	Most-adapted genes	GO:0005840, GO:0006412, GO:0003735
Sv	SVE_1888300.1	0.679706	0.288288	Most-adapted genes
Sv	SVE_1005200.1	0.67966	0.366228	Most-adapted genes	GO:0005840, GO:0006412, GO:0003735
Sv	SVE_1880400.1	0.679432	0.292793	Most-adapted genes
Sv	SVE_0311000.1	0.679271	0.328744	Most-adapted genes	GO:0008236, GO:0006508, GO:0016020, GO:0016021
Sv	SVE_0995700.1	0.679222	0.352941	Most-adapted genes	GO:0005853, GO:0006414, GO:0003746, GO:0006412
Sv	SVE_1242500.1	0.679129	0.223164	Most-adapted genes
Sv	SVE_1616500.1	0.679098	0.238095	Most-adapted genes
Sv	SVE_0023600.1	0.678936	0.374251	Most-adapted genes	GO:0048037, GO:0003824, GO:0000166, GO:0016874, GO:0005739, GO:0004775, GO:0004776, GO:0006099
Sv	SVE_0888000.1	0.678895	0.244353	Most-adapted genes
Sv	SVE_0238400.1	0.678744	0.39723	Most-adapted genes
Sv	SVE_1820000.1	0.678388	0.288889	Most-adapted genes
Sv	SVE_1275600.1	0.678229	0.395062	Most-adapted genes	GO:0005840, GO:0006412, GO:0003735
Sv	SVE_1077200.1	0.67819	0.390863	Most-adapted genes
Sv	SVE_1019500.1	0.678034	0.333333	Most-adapted genes	GO:0046872, GO:0005524, GO:0000166, GO:0016874
Sv	SVE_1222500.1	0.677518	0.224593	Most-adapted genes
Sv	SVE_0949900.1	0.677415	0.273118	Most-adapted genes
Sv	SVE_1621000.1	0.677388	0.437398	Most-adapted genes	GO:0005840, GO:0006412, GO:0003735
Sv	SVE_0944800.1	0.677347	0.388489	Most-adapted genes	GO:0016679, GO:0008121, GO:0051537, GO:0016491, GO:0016020, GO:0055114, GO:0005739, GO:0022900, GO:0005743, GO:0070469
Sv	SVE_0706600.1	0.677346	0.289677	Most-adapted genes	GO:0008475, GO:0031418, GO:0016705, GO:0005506, GO:0016491, GO:0055114
Sv	SVE_1967600.1	0.677302	0.341176	Most-adapted genes
Sv	SVE_1728100.1	0.6773	0.301802	Most-adapted genes	GO:0016020, GO:0016021
Sv	SVE_0726500.1	0.677268	0.259887	Most-adapted genes
Sv	SVE_1617300.1	0.677011	0.324762	Most-adapted genes	GO:0033179, GO:1902600, GO:0015078, GO:0006811
Sv	SVE_1622700.1	0.677005	0.384804	Most-adapted genes	GO:0008289
Sv	SVE_0395700.1	0.676438	0.234742	Most-adapted genes
Sv	SVE_1582400.1	0.676131	0.377562	Most-adapted genes	GO:0000276, GO:0015986, GO:0015078
Sv	SVE_0012800.1	0.675776	0.407631	Most-adapted genes	GO:0005840, GO:0006412, GO:0003735
Sv	SVE_0107900.1	0.675688	0.322823	Most-adapted genes
Sv	SVE_1163300.1	0.675572	0.275132	Most-adapted genes	GO:0006508, GO:0004222, GO:0008237
Sv	SVE_1136200.1	0.675547	0.357078	Most-adapted genes	GO:0008234, GO:0006508
Sv	SVE_1787400.1	0.67544	0.265393	Most-adapted genes
Sv	SVE_0754300.1	0.675323	0.360841	Most-adapted genes	GO:0005525, GO:0003924
Sv	SVE_1624900.1	0.675282	0.310345	Most-adapted genes
Sv	SVE_1711000.1	0.675229	0.337648	Most-adapted genes
Sv	SVE_0637800.1	0.674999	0.25	Most-adapted genes
Sv	SVE_0076400.1	0.674866	0.432692	Most-adapted genes	GO:0042025, GO:0000786, GO:0003677, GO:0046982, GO:0005634, GO:0005694
Sv	SVE_0013400.1	0.674846	0.308877	Most-adapted genes	GO:0004867, GO:0010951
Sv	SVE_0726700.1	0.67479	0.26455	Most-adapted genes
Sv	SVE_0228000.1	0.67466	0.48847	Most-adapted genes	GO:0042302, GO:0016020, GO:0016021
Sv	SVE_0157600.1	0.674367	0.432139	Most-adapted genes
Sv	SVE_0867500.1	0.674335	0.288018	Most-adapted genes	GO:0008061, GO:0005576
Sv	SVE_1753800.1	0.674291	0.291521	Most-adapted genes	GO:0008168
Sv	SVE_0940500.2	0.674203	0.309748	Most-adapted genes	GO:0004645, GO:0008184, GO:0005975, GO:0030170, GO:0016740, GO:0016757, GO:0102250, GO:0102499
Sv	SVE_1696600.1	0.674123	0.286867	Most-adapted genes	GO:0005515
Sv	SVE_1499600.1	0.674052	0.322799	Most-adapted genes	GO:0016020, GO:0016021
Sv	SVE_0973200.1	0.674044	0.331429	Most-adapted genes	GO:0005509
Sv	SVE_1703800.1	0.673866	0.369748	Most-adapted genes
Sv	SVE_0519800.1	0.673837	0.392655	Most-adapted genes	GO:0005840
Sv	SVE_0000100.1	0.673681	0.45641	Most-adapted genes	GO:0000786, GO:0003677, GO:0046982, GO:0005634, GO:0005694
Sv	SVE_1704700.1	0.0566659	0.73913	Least-adapted genes
Sv	SVE_1698700.1	0.0773293	0.590909	Least-adapted genes
Sv	SVE_1670500.1	0.0949865	0.712121	Least-adapted genes
Sv	SVE_1223600.1	0.0983735	0.333333	Least-adapted genes
Sv	SVE_1669300.1	0.113012	0.568558	Least-adapted genes
Sv	SVE_1664200.1	0.131187	0.661765	Least-adapted genes
Sv	SVE_1664600.1	0.131189	0.671053	Least-adapted genes
Sv	SVE_1664300.1	0.140964	0.567086	Least-adapted genes	GO:0016020, GO:0016021
Sv	SVE_1696900.1	0.144311	0.543478	Least-adapted genes
Sv	SVE_1664900.1	0.146384	0.601721	Least-adapted genes	GO:0005515
Sv	SVE_0193800.1	0.148627	0.577114	Least-adapted genes
Sv	SVE_1664500.1	0.148985	0.534216	Least-adapted genes	GO:0016020, GO:0016021
Sv	SVE_1670600.1	0.152701	0.558712	Least-adapted genes
Sv	SVE_1809000.1	0.155687	0.589041	Least-adapted genes
Sv	SVE_1675300.1	0.156513	0.608696	Least-adapted genes
Sv	SVE_1675400.1	0.164071	0.604938	Least-adapted genes
Sv	SVE_1670700.1	0.166467	0.559952	Least-adapted genes	GO:0019069
Sv	SVE_1267200.1	0.172726	0.538813	Least-adapted genes
Sv	SVE_1672000.1	0.179875	0.560675	Least-adapted genes	GO:0016020, GO:0016021
Sv	SVE_1677100.1	0.182395	0.568471	Least-adapted genes
Sv	SVE_1670800.1	0.184183	0.562334	Least-adapted genes	GO:0019069, GO:0005524
Sv	SVE_1675500.1	0.186497	0.567021	Least-adapted genes	GO:0008484, GO:0016772, GO:0003824, GO:0016021, GO:0016020
Sv	SVE_1136300.1	0.190404	0.43379	Least-adapted genes
Sv	SVE_1669700.1	0.192	0.5586	Least-adapted genes
Sv	SVE_1671900.1	0.195011	0.476923	Least-adapted genes
Sv	SVE_1704600.1	0.198573	0.550077	Least-adapted genes
Sv	SVE_1694000.1	0.199085	0.592593	Least-adapted genes
Sv	SVE_1222800.1	0.208654	0.534247	Least-adapted genes
Sv	SVE_1664700.1	0.209179	0.489388	Least-adapted genes	GO:0019538
Sv	SVE_1306400.1	0.211081	0.485816	Least-adapted genes	GO:0016020, GO:0016021
Sv	SVE_1265500.1	0.217216	0.533784	Least-adapted genes
Sv	SVE_0733500.1	0.217276	0.490868	Least-adapted genes
Sv	SVE_2023300.1	0.222512	0.479167	Least-adapted genes
Sv	SVE_0934900.1	0.23035	0.481818	Least-adapted genes
Sv	SVE_1303100.1	0.234083	0.468165	Least-adapted genes
Sv	SVE_2013500.1	0.238835	0.492754	Least-adapted genes
Sv	SVE_0681800.1	0.240333	0.412935	Least-adapted genes
Sv	SVE_1124400.1	0.248427	0.509259	Least-adapted genes
Sv	SVE_1498700.1	0.251289	0.5	Least-adapted genes
Sv	SVE_1796200.1	0.253278	0.48659	Least-adapted genes
Sv	SVE_1958200.1	0.254111	0.444444	Least-adapted genes
Sv	SVE_1669600.1	0.254482	0.492424	Least-adapted genes	GO:0003677
Sv	SVE_1218000.1	0.254698	0.467662	Least-adapted genes	GO:0016020, GO:0016021
Sv	SVE_1988100.1	0.25523	0.393258	Least-adapted genes
Sv	SVE_1761900.1	0.255534	0.407407	Least-adapted genes
Sv	SVE_1664800.1	0.256824	0.487432	Least-adapted genes	GO:0005515
Sv	SVE_1399200.1	0.256998	0.428251	Least-adapted genes
Sv	SVE_0830800.1	0.257497	0.43379	Least-adapted genes
Sv	SVE_1694100.1	0.258229	0.515588	Least-adapted genes
Sv	SVE_1677200.1	0.258477	0.502309	Least-adapted genes
Sv	SVE_2016100.1	0.259355	0.386243	Least-adapted genes	GO:0016020, GO:0016021
Sv	SVE_1120500.1	0.261948	0.444444	Least-adapted genes
Sv	SVE_0629400.1	0.262735	0.430894	Least-adapted genes
Sv	SVE_1669800.1	0.263022	0.579327	Least-adapted genes
Sv	SVE_0475400.1	0.2646	0.449275	Least-adapted genes	GO:0016020, GO:0016021
Sv	SVE_1657000.1	0.26527	0.35	Least-adapted genes
Sv	SVE_1418700.1	0.266947	0.458937	Least-adapted genes
Sv	SVE_2015600.1	0.270026	0.411765	Least-adapted genes
Sv	SVE_1226600.1	0.2748	0.412935	Least-adapted genes
Sv	SVE_1228600.1	0.277875	0.440476	Least-adapted genes	GO:0016020, GO:0016021
Sv	SVE_2017000.1	0.278029	0.399061	Least-adapted genes
Sv	SVE_0756600.1	0.279168	0.380342	Least-adapted genes
Sv	SVE_0739400.1	0.280397	0.45098	Least-adapted genes
Sv	SVE_0634300.1	0.280846	0.417671	Least-adapted genes
Sv	SVE_0733700.1	0.280846	0.417671	Least-adapted genes
Sv	SVE_2001200.1	0.282502	0.412879	Least-adapted genes	GO:0016020, GO:0016021
Sv	SVE_1669500.1	0.282835	0.429224	Least-adapted genes	GO:0003677
Sv	SVE_0634200.1	0.282836	0.401961	Least-adapted genes
Sv	SVE_1000925750.1	0.284487	0.398268	Least-adapted genes
Sv	SVE_0667400.1	0.287067	0.38009	Least-adapted genes
Sv	SVE_1222200.1	0.28756	0.491803	Least-adapted genes
Sv	SVE_2016300.1	0.287564	0.419476	Least-adapted genes	GO:0016020, GO:0016021
Sv	SVE_0140900.1	0.288081	0.404444	Least-adapted genes
Sv	SVE_1925500.1	0.28831	0.462046	Least-adapted genes
Sv	SVE_1981600.1	0.290842	0.428135	Least-adapted genes
Sv	SVE_2018400.1	0.291098	0.437811	Least-adapted genes
Sv	SVE_0596200.1	0.293624	0.504065	Least-adapted genes
Sv	SVE_0032000.1	0.294305	0.450216	Least-adapted genes
Sv	SVE_1251700.1	0.294824	0.374429	Least-adapted genes
Sv	SVE_0197000.1	0.295927	0.399723	Least-adapted genes
Sv	SVE_0392300.1	0.296128	0.423221	Least-adapted genes
Sv	SVE_1107500.1	0.297781	0.469816	Least-adapted genes	GO:0016020, GO:0016021
Sv	SVE_0687100.1	0.297828	0.379747	Least-adapted genes
Sv	SVE_1124500.1	0.298724	0.454545	Least-adapted genes
Sv	SVE_2016900.1	0.301472	0.420455	Least-adapted genes
Sv	SVE_2025800.1	0.303055	0.365591	Least-adapted genes
Sv	SVE_0761100.1	0.304736	0.40796	Least-adapted genes
Sv	SVE_0996000.1	0.305077	0.462264	Least-adapted genes
Sv	SVE_0798600.1	0.308695	0.459459	Least-adapted genes
Sv	SVE_2007400.1	0.308902	0.434599	Least-adapted genes
Sv	SVE_0912000.1	0.30897	0.426523	Least-adapted genes	GO:0016020, GO:0016021
Sv	SVE_0722100.1	0.30972	0.375	Least-adapted genes
Sv	SVE_1517100.1	0.31085	0.487179	Least-adapted genes
Sv	SVE_1991800.1	0.310949	0.328358	Least-adapted genes
Sv	SVE_1401900.1	0.311108	0.463203	Least-adapted genes
Sv	SVE_2001800.1	0.311286	0.41791	Least-adapted genes
Sv	SVE_0092200.1	0.314135	0.396825	Least-adapted genes
Sv	SVE_1995300.1	0.314165	0.398148	Least-adapted genes
Sv	SVE_1040200.1	0.314634	0.378151	Least-adapted genes	GO:0016020, GO:0016021
Sv	SVE_1098400.1	0.315035	0.365297	Least-adapted genes
Sv	SVE_2003800.1	0.315773	0.383085	Least-adapted genes
Sv	SVE_0946000.1	0.316349	0.409283	Least-adapted genes
Sv	SVE_0163800.1	0.31689	0.377129	Least-adapted genes
Sv	SVE_1664400.1	0.31741	0.42524	Least-adapted genes
Sv	SVE_1101800.1	0.317751	0.355263	Least-adapted genes
Sv	SVE_0759300.1	0.318773	0.415771	Least-adapted genes
Sv	SVE_0448400.1	0.318934	0.442786	Least-adapted genes
Sv	SVE_0156700.1	0.319253	0.333333	Least-adapted genes	GO:0016020, GO:0016021
Sv	SVE_0766300.1	0.319263	0.363095	Least-adapted genes
Sv	SVE_0290000.1	0.320537	0.399061	Least-adapted genes
Sv	SVE_0032300.1	0.320776	0.383945	Least-adapted genes	GO:0015074, GO:0003676, GO:0016020, GO:0016021
Sv	SVE_1121400.1	0.320927	0.43573	Least-adapted genes	GO:0003677
Sv	SVE_1508900.1	0.321196	0.379747	Least-adapted genes
Sv	SVE_0250100.1	0.321587	0.425926	Least-adapted genes
Sv	SVE_0209700.1	0.321627	0.416667	Least-adapted genes	GO:0016020, GO:0016021
Sv	SVE_0851000.1	0.321645	0.385542	Least-adapted genes
Sv	SVE_0759100.1	0.321705	0.419355	Least-adapted genes
Sv	SVE_1669900.1	0.322504	0.425339	Least-adapted genes
Sv	SVE_1156300.1	0.322654	0.468468	Least-adapted genes
Sv	SVE_0709600.1	0.322969	0.399371	Least-adapted genes
Sv	SVE_0596000.1	0.323433	0.378378	Least-adapted genes
Sv	SVE_0160900.1	0.323863	0.513889	Least-adapted genes
Sv	SVE_1106800.1	0.323938	0.388889	Least-adapted genes	GO:0015074, GO:0003676
Sv	SVE_1995600.1	0.324108	0.411458	Least-adapted genes
Sv	SVE_0184100.1	0.324388	0.407407	Least-adapted genes
Sv	SVE_1331200.1	0.324611	0.396396	Least-adapted genes
Sv	SVE_0740700.1	0.324701	0.431624	Least-adapted genes
Sv	SVE_0258100.1	0.324963	0.379538	Least-adapted genes
Sv	SVE_0391700.1	0.325144	0.397531	Least-adapted genes
Sv	SVE_1106700.1	0.325179	0.398355	Least-adapted genes
Sv	SVE_1964100.1	0.325516	0.429043	Least-adapted genes
Sv	SVE_1121300.1	0.325872	0.39531	Least-adapted genes	GO:0003676
Sv	SVE_1999000.1	0.326082	0.343434	Least-adapted genes
Sv	SVE_0809000.1	0.326591	0.406433	Least-adapted genes
Sv	SVE_1420400.1	0.327496	0.373494	Least-adapted genes
Sv	SVE_1760600.1	0.328101	0.4081	Least-adapted genes
Sv	SVE_1107200.1	0.329055	0.411111	Least-adapted genes
Sv	SVE_1987900.1	0.329232	0.400844	Least-adapted genes
Sv	SVE_1663100.1	0.329518	0.383075	Least-adapted genes
Sv	SVE_1553900.1	0.329613	0.398095	Least-adapted genes
Sv	SVE_2008800.1	0.330105	0.350877	Least-adapted genes
Sv	SVE_1915000.1	0.330418	0.396825	Least-adapted genes
Sv	SVE_0859200.1	0.330565	0.423963	Least-adapted genes
Sv	SVE_0073700.1	0.331071	0.393035	Least-adapted genes
Sv	SVE_1998800.1	0.331594	0.410526	Least-adapted genes
Sv	SVE_1830200.1	0.332127	0.375527	Least-adapted genes
Sv	SVE_0677600.1	0.332606	0.385496	Least-adapted genes
Sv	SVE_1303400.1	0.332734	0.356808	Least-adapted genes
Sv	SVE_1998100.1	0.334066	0.394737	Least-adapted genes
Sv	SVE_0534400.1	0.334542	0.408451	Least-adapted genes
Sv	SVE_1689500.1	0.334858	0.34632	Least-adapted genes	GO:0016020, GO:0016021
Sv	SVE_1124300.1	0.335452	0.373737	Least-adapted genes	GO:0016020, GO:0016021
Sv	SVE_1913900.1	0.335457	0.447712	Least-adapted genes
Sv	SVE_1094200.1	0.335532	0.432153	Least-adapted genes
Sv	SVE_0667700.1	0.336235	0.37741	Least-adapted genes	GO:0016020, GO:0016021
Sv	SVE_2013700.1	0.336268	0.451977	Least-adapted genes
Sv	SVE_1624700.1	0.337214	0.379928	Least-adapted genes
Sv	SVE_1999800.1	0.338257	0.444444	Least-adapted genes
Sv	SVE_1781200.1	0.338324	0.350427	Least-adapted genes
Sv	SVE_0915300.1	0.339667	0.423077	Least-adapted genes
Sv	SVE_0133300.1	0.339692	0.383838	Least-adapted genes
Sv	SVE_0775600.1	0.340188	0.44	Least-adapted genes
Sv	SVE_1958100.1	0.340202	0.41453	Least-adapted genes
Sv	SVE_1000941750.1	0.341076	0.339744	Least-adapted genes
Sv	SVE_0104900.1	0.341339	0.35461	Least-adapted genes
Sv	SVE_1948400.1	0.341579	0.406433	Least-adapted genes
Sv	SVE_1760500.1	0.342044	0.419847	Least-adapted genes
Sv	SVE_1162000.1	0.342234	0.342995	Least-adapted genes
Sv	SVE_0677700.1	0.342634	0.360799	Least-adapted genes	GO:0004523, GO:0003676, GO:0090502
Sv	SVE_1950800.1	0.343302	0.360731	Least-adapted genes
Sv	SVE_0449100.1	0.343376	0.380208	Least-adapted genes
Sv	SVE_1964200.1	0.343645	0.299578	Least-adapted genes	GO:0015074, GO:0003676
Sv	SVE_0761400.1	0.343669	0.403955	Least-adapted genes
Sv	SVE_0439500.1	0.344096	0.351351	Least-adapted genes
Sv	SVE_1035600.1	0.344175	0.382514	Least-adapted genes
Sv	SVE_1099100.1	0.344199	0.369565	Least-adapted genes	GO:0015074, GO:0006310, GO:0003677
Sv	SVE_1007800.1	0.344346	0.421744	Least-adapted genes
Sv	SVE_0698100.1	0.344588	0.304487	Least-adapted genes	GO:0016020, GO:0016021
Sv	SVE_0775500.1	0.344588	0.391111	Least-adapted genes	GO:0015074, GO:0003676
Sv	SVE_1595000.1	0.345111	0.399425	Least-adapted genes
Sv	SVE_1438300.1	0.345289	0.396396	Least-adapted genes
Sv	SVE_0201800.1	0.345461	0.410256	Least-adapted genes	GO:0016020, GO:0016021
Sv	SVE_2004800.1	0.345768	0.360731	Least-adapted genes
Sv	SVE_1707100.1	0.346238	0.410112	Least-adapted genes
Sv	SVE_0084900.1	0.346254	0.378049	Least-adapted genes
Sv	SVE_0874600.1	0.346299	0.357488	Least-adapted genes
Sv	SVE_0810700.1	0.346341	0.353909	Least-adapted genes
Sv	SVE_0721700.1	0.346446	0.344322	Least-adapted genes
Sv	SVE_0808900.1	0.346756	0.398268	Least-adapted genes
Sv	SVE_0393200.1	0.347118	0.371429	Least-adapted genes
Sv	SVE_2028700.1	0.347183	0.4	Least-adapted genes
Sv	SVE_0661700.1	0.347328	0.328358	Least-adapted genes
Sv	SVE_0953700.1	0.347534	0.416667	Least-adapted genes
Sv	SVE_1121800.1	0.347913	0.44795	Least-adapted genes
Sv	SVE_0832900.1	0.348636	0.399123	Least-adapted genes
Sv	SVE_0196900.1	0.349083	0.395755	Least-adapted genes
Sv	SVE_1651800.1	0.349544	0.435654	Least-adapted genes
Sv	SVE_1704100.1	0.350272	0.382051	Least-adapted genes
Sv	SVE_0072700.1	0.350316	0.410539	Least-adapted genes
Sv	SVE_0391400.1	0.350325	0.388889	Least-adapted genes	GO:0016020, GO:0016021
Sv	SVE_0074100.1	0.350427	0.417874	Least-adapted genes
Sv	SVE_1940100.1	0.350577	0.382514	Least-adapted genes	GO:0005634, GO:0003700, GO:0006355
Sv	SVE_0085800.1	0.350694	0.392936	Least-adapted genes
Sv	SVE_1469800.1	0.35071	0.371134	Least-adapted genes
Sv	SVE_1106600.1	0.351019	0.367901	Least-adapted genes
Sv	SVE_0393900.1	0.351064	0.438819	Least-adapted genes	GO:0016020, GO:0016021
Sv	SVE_1859000.1	0.351302	0.434028	Least-adapted genes
Sv	SVE_1152100.1	0.351421	0.357013	Least-adapted genes
Sv	SVE_1991400.1	0.351622	0.369863	Least-adapted genes
Sv	SVE_0967500.1	0.352436	0.385892	Least-adapted genes	GO:0046982, GO:0005634
Sv	SVE_1989100.1	0.352784	0.362869	Least-adapted genes
Sv	SVE_1993200.1	0.352838	0.357895	Least-adapted genes	GO:0016020, GO:0016021
Sv	SVE_1342100.1	0.352903	0.339041	Least-adapted genes
Sv	SVE_0685700.1	0.352947	0.365591	Least-adapted genes	GO:0006313, GO:0004803, GO:0003677
Sv	SVE_1223500.1	0.353128	0.406619	Least-adapted genes
Sv	SVE_1099300.1	0.353129	0.39881	Least-adapted genes
Sv	SVE_1473900.1	0.35314	0.423333	Least-adapted genes
Sv	SVE_0166200.1	0.353602	0.390295	Least-adapted genes
Sv	SVE_2024700.1	0.353774	0.371528	Least-adapted genes
Sv	SVE_0892800.1	0.353949	0.34375	Least-adapted genes
Sv	SVE_2012100.1	0.354643	0.386179	Least-adapted genes
Sv	SVE_1598800.1	0.354723	0.345382	Least-adapted genes
Sv	SVE_0063000.1	0.354829	0.36689	Least-adapted genes	GO:0016020, GO:0016021
Sv	SVE_0895900.1	0.354871	0.404167	Least-adapted genes
Sv	SVE_0133600.1	0.35499	0.345679	Least-adapted genes
Sv	SVE_0196800.1	0.355346	0.385714	Least-adapted genes	GO:0003676
Sv	SVE_0544000.1	0.355484	0.378205	Least-adapted genes
Sv	SVE_0593300.1	0.355837	0.382838	Least-adapted genes	GO:0046540, GO:0005688, GO:0000398, GO:0005634, GO:0006397, GO:0008380, GO:0003723, GO:0005681
Sv	SVE_0839400.1	0.355899	0.371069	Least-adapted genes	GO:0015074, GO:0003676
Sv	SVE_1691400.1	0.356443	0.318182	Least-adapted genes
Sv	SVE_0898300.1	0.357081	0.347826	Least-adapted genes
Sv	SVE_2008400.1	0.357799	0.403509	Least-adapted genes
Sv	SVE_0647100.1	0.357949	0.378227	Least-adapted genes	GO:0015074, GO:0003676
Sv	SVE_0832100.1	0.358264	0.445602	Least-adapted genes	GO:0015074, GO:0003676
Sv	SVE_1182900.1	0.358448	0.416822	Least-adapted genes
Sv	SVE_1981400.1	0.35857	0.36253	Least-adapted genes
Sv	SVE_1663200.1	0.358888	0.327074	Least-adapted genes	GO:0015074, GO:0003676
Sv	SVE_1777200.1	0.359497	0.374587	Least-adapted genes	GO:0016020, GO:0016021
Sv	SVE_1099200.1	0.35965	0.373563	Least-adapted genes
Sv	SVE_2018800.1	0.359695	0.362069	Least-adapted genes
Sv	SVE_0386000.1	0.359794	0.341254	Least-adapted genes
Sv	SVE_0766000.1	0.359875	0.362649	Least-adapted genes
Sv	SVE_1824400.1	0.360036	0.405229	Least-adapted genes	GO:0046872
Sv	SVE_2004900.1	0.360386	0.344322	Least-adapted genes	GO:0016020, GO:0016021
Sv	SVE_0543900.1	0.360627	0.418164	Least-adapted genes
Sv	SVE_2013400.1	0.360774	0.393939	Least-adapted genes
Sv	SVE_1704800.1	0.3611	0.396573	Least-adapted genes	GO:0004190, GO:0006508, GO:0003676, GO:0008270
Sv	SVE_1150200.1	0.361544	0.418099	Least-adapted genes
Sv	SVE_0740600.1	0.361629	0.446429	Least-adapted genes	GO:0016020, GO:0016021
Sv	SVE_0970300.1	0.361979	0.417798	Least-adapted genes
Sv	SVE_0667900.1	0.362092	0.345794	Least-adapted genes
Sv	SVE_1780800.1	0.362333	0.484594	Least-adapted genes	GO:0016020, GO:0016021
Sv	SVE_0133400.1	0.362485	0.424242	Least-adapted genes
Sv	SVE_0356600.1	0.362767	0.391753	Least-adapted genes
Sv	SVE_1158800.1	0.362939	0.382263	Least-adapted genes
Sv	SVE_1156900.1	0.363545	0.392694	Least-adapted genes	GO:0000439, GO:0006289, GO:0006355
Sv	SVE_0682100.1	0.363603	0.415385	Least-adapted genes
Sv	SVE_1106400.1	0.363852	0.362403	Least-adapted genes
Sv	SVE_1987600.1	0.364159	0.351111	Least-adapted genes
Sv	SVE_1032800.1	0.364337	0.347826	Least-adapted genes
Sv	SVE_1106900.1	0.36464	0.385281	Least-adapted genes
Sv	SVE_2005000.1	0.364644	0.382576	Least-adapted genes
Sv	SVE_1928100.1	0.364909	0.303922	Least-adapted genes
Sv	SVE_0073600.1	0.364914	0.402899	Least-adapted genes
Sv	SVE_0142400.1	0.365202	0.362869	Least-adapted genes
Sv	SVE_0830900.1	0.365275	0.378216	Least-adapted genes
Sv	SVE_1089400.1	0.3653	0.430894	Least-adapted genes
Sv	SVE_1674200.1	0.365833	0.376263	Least-adapted genes
Sv	SVE_1989000.1	0.366012	0.354167	Least-adapted genes
Sv	SVE_0184200.1	0.366049	0.384016	Least-adapted genes
Sv	SVE_1789800.1	0.366336	0.397436	Least-adapted genes
Sv	SVE_0111600.1	0.366369	0.433333	Least-adapted genes
Sv	SVE_0018900.2	0.366485	0.414191	Least-adapted genes
Sv	SVE_1704000.1	0.366763	0.422857	Least-adapted genes
Sv	SVE_0386500.1	0.366928	0.385864	Least-adapted genes
Sv	SVE_0613400.1	0.367046	0.361582	Least-adapted genes
Sv	SVE_0914000.1	0.367978	0.347826	Least-adapted genes
Sv	SVE_1164000.1	0.36835	0.396382	Least-adapted genes	GO:0016020, GO:0016021
Sv	SVE_0759400.1	0.368765	0.390377	Least-adapted genes
Sv	SVE_0080700.1	0.368805	0.349835	Least-adapted genes
Sv	SVE_0761200.1	0.369526	0.425	Least-adapted genes
Sv	SVE_0601100.1	0.369563	0.373106	Least-adapted genes	GO:0005758
Sv	SVE_0914700.1	0.369655	0.352246	Least-adapted genes
Sv	SVE_1591400.1	0.369995	0.386831	Least-adapted genes	GO:0016020, GO:0016021
Sv	SVE_1763200.1	0.370038	0.413333	Least-adapted genes
Sv	SVE_0610200.1	0.37022	0.347418	Least-adapted genes
Sv	SVE_1699000.1	0.370406	0.35	Least-adapted genes
Sv	SVE_1928300.1	0.370471	0.374302	Least-adapted genes
Sv	SVE_0032400.1	0.371024	0.397386	Least-adapted genes
Sv	SVE_0342600.1	0.371053	0.336879	Least-adapted genes
Sv	SVE_0488100.1	0.371518	0.345479	Least-adapted genes	GO:0016791, GO:0016020, GO:0016021, GO:0016311
Sv	SVE_1185800.1	0.37184	0.370523	Least-adapted genes
Sv	SVE_0097100.1	0.371936	0.382979	Least-adapted genes
Sv	SVE_2022500.1	0.372113	0.370031	Least-adapted genes	GO:0016020, GO:0016021
Sv	SVE_0682000.1	0.372165	0.359477	Least-adapted genes
Sv	SVE_1542200.1	0.372322	0.362897	Least-adapted genes	GO:0015074, GO:0003676
Sv	SVE_0831000.1	0.372325	0.382634	Least-adapted genes	GO:0015074, GO:0003676
Sv	SVE_0239300.1	0.372555	0.362869	Least-adapted genes
Sv	SVE_0240500.1	0.372609	0.368852	Least-adapted genes	GO:0006261, GO:0005634, GO:0006260
Sv	SVE_1089100.1	0.372685	0.305221	Least-adapted genes
Sv	SVE_1682000.1	0.372866	0.352941	Least-adapted genes
Sv	SVE_1310700.1	0.372875	0.412025	Least-adapted genes	GO:0004190, GO:0006508, GO:0003676, GO:0008270
Sv	SVE_0857600.1	0.372962	0.319048	Least-adapted genes
Sv	SVE_0056500.1	0.373068	0.316151	Least-adapted genes	GO:0016020, GO:0016021
Sv	SVE_0136800.1	0.373081	0.364035	Least-adapted genes
Sv	SVE_0455500.1	0.373799	0.394984	Least-adapted genes
Sv	SVE_0097300.1	0.373847	0.378289	Least-adapted genes
Sv	SVE_0292900.1	0.373893	0.398409	Least-adapted genes
Sv	SVE_0327000.1	0.374311	0.379832	Least-adapted genes	GO:0008076, GO:0005249, GO:0006811, GO:0005216, GO:0051260, GO:0006813, GO:0005515, GO:0055085, GO:0016020, GO:0016021, GO:0005267, GO:0071805, GO:0005244, GO:0034765
Sv	SVE_0769900.1	0.374396	0.354167	Least-adapted genes
Sv	SVE_0765800.1	0.374445	0.363914	Least-adapted genes
Sv	SVE_1266100.1	0.374557	0.327416	Least-adapted genes
Sv	SVE_0382600.1	0.374588	0.367063	Least-adapted genes
Sv	SVE_1158100.1	0.374589	0.396904	Least-adapted genes	GO:1990423, GO:0007093
Sv	SVE_1958300.1	0.374864	0.385507	Least-adapted genes
Sv	SVE_2018500.1	0.375301	0.352381	Least-adapted genes
Sv	SVE_0264100.1	0.375693	0.355856	Least-adapted genes
Sv	SVE_1244100.1	0.375748	0.420635	Least-adapted genes
Sv	SVE_0324600.1	0.37583	0.360071	Least-adapted genes
Sv	SVE_0603400.1	0.376139	0.373259	Least-adapted genes
Sv	SVE_0435300.1	0.376644	0.387464	Least-adapted genes
Sv	SVE_1149500.1	0.376697	0.350649	Least-adapted genes	GO:0016020, GO:0016021
Sv	SVE_0754200.1	0.376765	0.387914	Least-adapted genes
Sv	SVE_2010100.1	0.376786	0.309524	Least-adapted genes
Sv	SVE_1631700.1	0.37694	0.324675	Least-adapted genes
Sv	SVE_1220400.1	0.376952	0.341991	Least-adapted genes
Sv	SVE_0217300.1	0.377019	0.390181	Least-adapted genes
Sv	SVE_1634200.1	0.377071	0.333333	Least-adapted genes
Sv	SVE_1927700.1	0.377102	0.365506	Least-adapted genes
Sv	SVE_1102900.1	0.377247	0.385093	Least-adapted genes	GO:0006468, GO:0005524, GO:0004672, GO:0000166, GO:0004674
Sv	SVE_1230200.1	0.377341	0.308066	Least-adapted genes	GO:0005515
Sv	SVE_2007900.1	0.377643	0.36758	Least-adapted genes
Sv	SVE_1136400.1	0.37804	0.389558	Least-adapted genes
Sv	SVE_1100600.1	0.378059	0.35	Least-adapted genes
Sv	SVE_1010900.1	0.37806	0.321839	Least-adapted genes
Sv	SVE_1309900.1	0.37829	0.311966	Least-adapted genes
Sv	SVE_1662000.1	0.378426	0.396169	Least-adapted genes	GO:0004190, GO:0006508, GO:0003676, GO:0008270
Sv	SVE_1661200.1	0.378538	0.352688	Least-adapted genes	GO:0015074, GO:0003676

## Sheet: Ce
File S3. GeneIDs, Codon Adaptation Index (CAI) values, fractional GC content, and GO term accession number of the 2% of genes with the highest and lowest CAI values for each Strongyloides species and C. elegans
Species	Gene ID	CAI by genus-specific usage rule	GC	Description	GO term ID
Ce	B0222.6	0.930051	0.59548	Most-adapted genes	GO:0042302
Ce	B0222.8	0.924384	0.59548	Most-adapted genes	GO:0005581, GO:0042302, GO:0003674, GO:0005575, GO:0002164
Ce	W09C5.6b	0.922121	0.525822	Most-adapted genes
Ce	F02A9.2	0.920721	0.526412	Most-adapted genes	GO:0005576, GO:0008289
Ce	W09C5.6a	0.914801	0.533875	Most-adapted genes
Ce	T20G5.7	0.912576	0.557377	Most-adapted genes	GO:1905905
Ce	F02A9.3	0.908552	0.520947	Most-adapted genes	GO:0005576, GO:0008289, GO:0005504, GO:0019841
Ce	R03G5.1	0.902162	0.530172	Most-adapted genes	GO:0003924, GO:0005525, GO:0000166, GO:0005737, GO:0006412, GO:0003746, GO:0006414, GO:0008135
Ce	B0513.3b	0.899148	0.479167	Most-adapted genes
Ce	F31E3.5	0.89731	0.525862	Most-adapted genes	GO:0003924, GO:0005525, GO:0000166, GO:0005737, GO:0006412, GO:0003746, GO:0006414, GO:0008135
Ce	F53F1.4	0.896171	0.59434	Most-adapted genes
Ce	C07A12.4	0.896043	0.532389	Most-adapted genes	GO:0005783, GO:0045454, GO:0016853, GO:0006457, GO:0003756, GO:0030968, GO:0016222, GO:0018401, GO:0031545, GO:0055114, GO:0003810, GO:0034976, GO:0080058, GO:0005788, GO:0043412
Ce	C42C1.14	0.892063	0.540541	Most-adapted genes	GO:0003735, GO:0005840, GO:0006412, GO:0022625, GO:0042254
Ce	F54E7.2	0.888782	0.567376	Most-adapted genes	GO:0003735, GO:0005840, GO:0006412, GO:0022627
Ce	C14B9.1	0.887245	0.531532	Most-adapted genes	GO:0005737, GO:0031072
Ce	Y71A12B.1c	0.886342	0.54955	Most-adapted genes
Ce	F23H12.4b	0.882676	0.628531	Most-adapted genes
Ce	E04A4.8	0.882478	0.543278	Most-adapted genes	GO:0003735, GO:0005840, GO:0006412, GO:0022625
Ce	T07H6.3	0.881788	0.603753	Most-adapted genes	GO:0016020, GO:0016021, GO:0042302
Ce	K02F2.2	0.880573	0.518265	Most-adapted genes	GO:0016787, GO:0005829, GO:0006730, GO:0004013, GO:0019510, GO:0033353
Ce	F55D10.2	0.879974	0.556306	Most-adapted genes	GO:0003723, GO:0003735, GO:0005840, GO:0006412, GO:0000027, GO:0022625, GO:0019843
Ce	T28C6.4	0.879577	0.6	Most-adapted genes	GO:0016020, GO:0016021, GO:0005581, GO:0042302
Ce	T28C6.6	0.879577	0.6	Most-adapted genes	GO:0016020, GO:0016021, GO:0005581, GO:0042302
Ce	F53A3.3b	0.878067	0.526144	Most-adapted genes
Ce	T03E6.7b	0.877728	0.542714	Most-adapted genes
Ce	K10B3.7	0.877637	0.520468	Most-adapted genes	GO:0005737, GO:0055114, GO:0016491, GO:0050661, GO:0005829, GO:0016620, GO:0051287, GO:0006096, GO:0004365, GO:0006006
Ce	B0393.1	0.877086	0.527076	Most-adapted genes	GO:0005737, GO:0003735, GO:0005840, GO:0006412, GO:0005515, GO:0022627, GO:0002181, GO:0015935, GO:0000028
Ce	W05B2.1	0.877051	0.596721	Most-adapted genes	GO:0016020, GO:0016021, GO:0042302
Ce	F56F3.5	0.876199	0.501292	Most-adapted genes	GO:0005737, GO:0005829, GO:0003735, GO:0005840, GO:0006412, GO:0022627
Ce	F46H5.3b	0.875892	0.531481	Most-adapted genes
Ce	C44B12.2b	0.875483	0.511236	Most-adapted genes
Ce	F53F1.5	0.873848	0.634259	Most-adapted genes	GO:0005576, GO:0042302, GO:0060106
Ce	C29F4.1	0.873833	0.598889	Most-adapted genes	GO:0016020, GO:0016021, GO:0042302
Ce	C27A2.2a	0.873136	0.51145	Most-adapted genes
Ce	W05B2.5	0.872965	0.597814	Most-adapted genes	GO:0016020, GO:0016021, GO:0042302
Ce	T10E10.2	0.872448	0.602649	Most-adapted genes	GO:0016020, GO:0016021, GO:0042302
Ce	K10B3.8	0.872385	0.524366	Most-adapted genes	GO:0005737, GO:0055114, GO:0016491, GO:0050661, GO:0005829, GO:0016620, GO:0051287, GO:0006096, GO:0004365, GO:0006006
Ce	F53A3.3a	0.872369	0.547074	Most-adapted genes
Ce	Y43B11AR.4	0.870815	0.537179	Most-adapted genes	GO:0003723, GO:0003735, GO:0005840, GO:0006412, GO:0022627, GO:0019843
Ce	D1007.12	0.870319	0.53125	Most-adapted genes	GO:0003723, GO:0005840, GO:0000027, GO:0022625, GO:0003735, GO:0006412, GO:1902626
Ce	Y37E3.7	0.869985	0.589286	Most-adapted genes	GO:0003735, GO:0005840, GO:0006412, GO:0022625, GO:0002181, GO:0032147, GO:0006414, GO:0043021, GO:0030295
Ce	B0222.7	0.869686	0.584181	Most-adapted genes	GO:0005581, GO:0042302, GO:0003674, GO:0005575, GO:0008150
Ce	Y71A12B.1a	0.867131	0.550607	Most-adapted genes
Ce	H06I04.4a	0.866939	0.542683	Most-adapted genes
Ce	F55G1.3	0.866604	0.532258	Most-adapted genes	GO:0003677, GO:0005634, GO:0046982, GO:0044877, GO:0005694, GO:0000786, GO:0006334
Ce	F27C1.8	0.866208	0.552047	Most-adapted genes	GO:0005581, GO:0042302, GO:0040002, GO:0060102, GO:0040032, GO:0040014, GO:0042338, GO:0042329
Ce	W05B2.6	0.864919	0.596721	Most-adapted genes	GO:0016020, GO:0016021, GO:0042302
Ce	M03F4.2b	0.864728	0.548549	Most-adapted genes
Ce	T10E10.1	0.864378	0.601545	Most-adapted genes	GO:0016020, GO:0016021, GO:0042302
Ce	B0513.3a	0.864302	0.481481	Most-adapted genes
Ce	F25H2.11	0.863036	0.483516	Most-adapted genes	GO:0005737, GO:0005509, GO:0005783
Ce	T04C12.4	0.860834	0.536693	Most-adapted genes	GO:0000166, GO:0005737, GO:0005524, GO:0015629, GO:0005856, GO:0009792, GO:0030866, GO:0005865, GO:0000281
Ce	T04C12.6	0.860834	0.536693	Most-adapted genes	GO:0000166, GO:0005737, GO:0005524, GO:0015629, GO:0005856, GO:0009792, GO:0030866, GO:0000281, GO:0005200
Ce	F38A3.2	0.859937	0.598263	Most-adapted genes	GO:0016020, GO:0016021, GO:0042302, GO:0045138, GO:0007423
Ce	R06C1.4	0.859689	0.52549	Most-adapted genes	GO:0003676, GO:0003723, GO:0003729, GO:0005847, GO:0098789
Ce	T08B2.10	0.858844	0.493639	Most-adapted genes	GO:0003735, GO:0005840, GO:0006412
Ce	F41F3.3	0.857545	0.651805	Most-adapted genes
Ce	C47E8.5	0.85739	0.481271	Most-adapted genes	GO:0005524, GO:0005737, GO:0005886, GO:0000166, GO:0005829, GO:0007049, GO:0005515, GO:0048471, GO:0006457, GO:0032991, GO:0002119, GO:0008340, GO:0040024, GO:0050821, GO:0045121, GO:0006935, GO:0042802, GO:0051082, GO:0016887, GO:0009986, GO:0050920, GO:0061077, GO:0009593, GO:0010035, GO:0043327, GO:0070781, GO:0034605, GO:0006470, GO:0006611, GO:0032516, GO:0035259, GO:0097718, GO:1990634
Ce	F42C5.8b	0.856437	0.494792	Most-adapted genes
Ce	F44C4.3	0.855661	0.515873	Most-adapted genes	GO:0005764, GO:0016787, GO:0006508, GO:0008233, GO:0005576, GO:0005615, GO:0004197, GO:0008234, GO:0051603, GO:0034644, GO:0071480
Ce	F57B1.4	0.855235	0.58805	Most-adapted genes	GO:0016020, GO:0016021, GO:0042302
Ce	Y47D7A.13	0.85468	0.612179	Most-adapted genes
Ce	F54H12.6	0.853467	0.53271	Most-adapted genes	GO:0005829, GO:0006412, GO:0003746, GO:0006414, GO:0005085, GO:0005853
Ce	T10E10.6	0.853236	0.600221	Most-adapted genes	GO:0016020, GO:0016021, GO:0042302
Ce	Y105E8B.1n	0.853173	0.566239	Most-adapted genes
Ce	F54C9.1	0.852982	0.524691	Most-adapted genes	GO:0003723, GO:0005737, GO:0006412, GO:0002119, GO:0043022, GO:0045138, GO:0035262, GO:0003746, GO:0007276, GO:0045901, GO:0045905, GO:0006414
Ce	Y105E8B.1a	0.852784	0.566082	Most-adapted genes
Ce	M03F4.2a	0.852718	0.552608	Most-adapted genes
Ce	C36E6.3	0.852436	0.526316	Most-adapted genes	GO:0005509, GO:0046872, GO:0016459, GO:0002119, GO:0040011, GO:0007517, GO:0006937, GO:0005859
Ce	F59F4.2	0.851819	0.535354	Most-adapted genes	GO:0016020, GO:0016021, GO:0005783, GO:0006486, GO:0030968
Ce	F17E9.9	0.851196	0.514905	Most-adapted genes	GO:0003677, GO:0005634, GO:0046982, GO:0044877, GO:0000785, GO:0005694, GO:0000786, GO:0006334
Ce	F35H10.11	0.851196	0.514905	Most-adapted genes	GO:0003677, GO:0005634, GO:0046982, GO:0044877, GO:0000785, GO:0005694, GO:0000786, GO:0006334
Ce	F25H2.5	0.85086	0.54329	Most-adapted genes	GO:0016301, GO:0016310, GO:0000166, GO:0016740, GO:0005524, GO:0040026, GO:0005515, GO:0030334, GO:0042802, GO:0006163, GO:0006241, GO:1901074, GO:0043410, GO:0004550, GO:0006220, GO:0006165, GO:0006183, GO:0006228
Ce	T10E10.5	0.850505	0.596899	Most-adapted genes	GO:0016020, GO:0016021, GO:0042302
Ce	JC8.3a	0.850353	0.522088	Most-adapted genes
Ce	B0336.10	0.849809	0.539007	Most-adapted genes	GO:0003735, GO:0005840, GO:0006412, GO:0022625, GO:0070180
Ce	Y82E9BR.3	0.849799	0.60114	Most-adapted genes	GO:0016020, GO:0016021, GO:0006811, GO:0005739, GO:0015078, GO:1902600, GO:0008289, GO:0033177, GO:0031966, GO:0015986, GO:0045263, GO:0046933, GO:0000276
Ce	C06A8.3	0.849442	0.528509	Most-adapted genes
Ce	Y75B12B.2	0.849416	0.53876	Most-adapted genes	GO:0005737, GO:0043231, GO:0016853, GO:0000413, GO:0003755, GO:0006457, GO:0016018
Ce	F30B5.1	0.849062	0.59846	Most-adapted genes	GO:0005581, GO:0042302, GO:0060102, GO:0042338
Ce	K08D12.6	0.84891	0.645242	Most-adapted genes
Ce	Y39B6A.20	0.848038	0.560034	Most-adapted genes	GO:0016787, GO:0005737, GO:0006508, GO:0008233, GO:0005576, GO:0004190, GO:0005764, GO:0012501, GO:0030163, GO:0098591
Ce	E04A4.7	0.847939	0.52381	Most-adapted genes	GO:0046872, GO:0009055, GO:0055114, GO:0020037, GO:0005739, GO:0005758, GO:0006123, GO:0006122, GO:0070469, GO:0022900, GO:0043280
Ce	F46F2.3	0.847597	0.572464	Most-adapted genes
Ce	F57B1.3	0.847596	0.591295	Most-adapted genes	GO:0016020, GO:0016021, GO:0042302
Ce	C23G10.3	0.847559	0.533602	Most-adapted genes	GO:0005634, GO:0003723, GO:0003735, GO:0005840, GO:0006412, GO:0022627, GO:0015935, GO:2001235
Ce	T27E9.1	0.846079	0.512735	Most-adapted genes	GO:0016020, GO:0016021, GO:0022857, GO:0055085, GO:0005515, GO:0005743, GO:0005347, GO:0015867, GO:0008340, GO:0005739, GO:0043065, GO:0005471, GO:0015866, GO:0007005
Ce	M163.3	0.845443	0.580542	Most-adapted genes	GO:0005634, GO:0003677, GO:0042025, GO:0005515, GO:0003690, GO:0006355, GO:0005737, GO:0005694, GO:0000784, GO:0000786, GO:0006334, GO:0016584, GO:0030261, GO:0031492, GO:0031936, GO:0045910
Ce	F45F2.2	0.845356	0.5	Most-adapted genes	GO:0003677, GO:0005634, GO:0046982, GO:0005694, GO:0000786, GO:0006334
Ce	F07A5.7b	0.845294	0.518652	Most-adapted genes
Ce	Y105E8B.1m	0.845277	0.572165	Most-adapted genes
Ce	F11G11.12	0.845124	0.567599	Most-adapted genes	GO:0016020, GO:0016021, GO:0030198, GO:0005615, GO:0042302, GO:0005201, GO:0031012
Ce	F37C12.11	0.842717	0.550562	Most-adapted genes	GO:0005737, GO:0003735, GO:0005840, GO:0006412, GO:0005515, GO:0005783, GO:0022627, GO:0005829, GO:0000447, GO:0005791, GO:0000461
Ce	C01B10.5c	0.842514	0.535519	Most-adapted genes
Ce	Y40B10A.1b	0.842235	0.531401	Most-adapted genes
Ce	F47B7.1	0.842227	0.505556	Most-adapted genes	GO:0016020, GO:0016021
Ce	ZK180.5c	0.842157	0.615833	Most-adapted genes
Ce	K11H12.2	0.842073	0.546341	Most-adapted genes	GO:0003723, GO:0003735, GO:0005840, GO:0006412, GO:0022625, GO:0002181
Ce	F09E5.15c	0.84204	0.506601	Most-adapted genes
Ce	W02A2.3b	0.841965	0.540767	Most-adapted genes
Ce	Y105E8B.1s	0.841777	0.562573	Most-adapted genes
Ce	C02E7.6	0.840951	0.615023	Most-adapted genes
Ce	F39B2.6	0.840734	0.553672	Most-adapted genes	GO:0005737, GO:0003729, GO:0003735, GO:0005840, GO:0006412, GO:0005783, GO:0008340, GO:0022627, GO:0005829, GO:0002181, GO:0005791, GO:0042788, GO:0098556
Ce	Y41E3.2	0.840233	0.593103	Most-adapted genes	GO:0016020, GO:0016021, GO:0030198, GO:0005615, GO:0042302, GO:0005201, GO:0031012, GO:0042338
Ce	F07D10.1	0.840102	0.554992	Most-adapted genes	GO:0003723, GO:0005634, GO:0005737, GO:0003735, GO:0005840, GO:0006412, GO:0000027, GO:0022625, GO:0019843
Ce	R102.2	0.839828	0.531746	Most-adapted genes
Ce	F09E5.15a	0.839301	0.506803	Most-adapted genes
Ce	R13A5.8	0.838467	0.526316	Most-adapted genes	GO:0003735, GO:0005840, GO:0006412, GO:0022625, GO:0008340, GO:0002181, GO:0019843
Ce	C36E6.5	0.837847	0.530214	Most-adapted genes	GO:0005509, GO:0046872, GO:0016459, GO:0002119, GO:0040011, GO:0043051, GO:0006937
Ce	ZC434.2	0.837512	0.502564	Most-adapted genes	GO:0006364, GO:0003735, GO:0005840, GO:0006412, GO:0032040, GO:0022627, GO:0042274
Ce	F26F12.1	0.837192	0.578161	Most-adapted genes	GO:0042302
Ce	ZK721.2	0.836977	0.521262	Most-adapted genes	GO:0046872, GO:0003779, GO:0005861, GO:0006936, GO:0040011, GO:0030017, GO:0045214, GO:0030172
Ce	C42D8.2	0.836681	0.499174	Most-adapted genes	GO:0005576, GO:0006869, GO:0031410, GO:0031983, GO:0042718, GO:0005319, GO:0045735
Ce	C15H9.6b	0.836613	0.511247	Most-adapted genes
Ce	C16A3.9	0.835267	0.532895	Most-adapted genes	GO:0005730, GO:0003735, GO:0005840, GO:0006412, GO:0022627, GO:0070181
Ce	F26D10.3	0.834918	0.513261	Most-adapted genes	GO:0005634, GO:0005737, GO:0005524, GO:0005886, GO:0000166, GO:0005829, GO:0016192, GO:0005515, GO:0016887, GO:0008340, GO:0009408, GO:0006986, GO:0031072, GO:0034620, GO:0042026, GO:0044183, GO:0051082, GO:0051085, GO:0051787, GO:0042147
Ce	Y75B12B.5	0.834335	0.528736	Most-adapted genes	GO:0005737, GO:0043231, GO:0016853, GO:0005515, GO:0000413, GO:0003755, GO:0006457, GO:0016018, GO:0005623
Ce	C44B12.2a	0.834273	0.520755	Most-adapted genes
Ce	F25H2.10	0.833588	0.522897	Most-adapted genes	GO:0005840, GO:0000027, GO:0022625, GO:0003735, GO:0002181, GO:0042254, GO:0070180
Ce	C09G5.5	0.833071	0.582809	Most-adapted genes	GO:0005581, GO:0042302
Ce	C47B2.3	0.832572	0.545657	Most-adapted genes	GO:0005525, GO:0005737, GO:0000166, GO:0003924, GO:0000278, GO:0005856, GO:0005874, GO:0007017, GO:0005200, GO:0009792, GO:0000226, GO:0008104, GO:0000132, GO:0032465, GO:0051642
Ce	H28O16.1a	0.832285	0.523191	Most-adapted genes
Ce	ZK180.5b	0.831178	0.595047	Most-adapted genes
Ce	F11C3.3	0.830867	0.522573	Most-adapted genes	GO:0005524, GO:0000166, GO:0005737, GO:0051015, GO:0005515, GO:0003779, GO:0003774, GO:0016459, GO:0018991, GO:0040011, GO:0005863, GO:0008307, GO:0031672, GO:0000146, GO:0006936, GO:0030241, GO:0005859, GO:0030016, GO:0032982
Ce	H39E23.3	0.830792	0.48639	Most-adapted genes	GO:0008017
Ce	F08G5.4	0.830778	0.565556	Most-adapted genes	GO:0016020, GO:0016021, GO:0042302
Ce	F09F7.2a	0.830508	0.554113	Most-adapted genes
Ce	F09E5.15b	0.830412	0.503333	Most-adapted genes
Ce	F28C6.7a	0.830315	0.55711	Most-adapted genes
Ce	T05E11.1	0.830297	0.548183	Most-adapted genes	GO:0003723, GO:0003729, GO:0003735, GO:0005840, GO:0006412, GO:0022627, GO:0015935, GO:0000028, GO:0019843
Ce	ZC373.7	0.829675	0.577181	Most-adapted genes	GO:0042302
Ce	B0041.4	0.829579	0.545279	Most-adapted genes	GO:0003723, GO:0003735, GO:0005840, GO:0006412, GO:0022625, GO:0008340
Ce	F21F8.7	0.829573	0.494872	Most-adapted genes	GO:0016787, GO:0006508, GO:0008233, GO:0005576, GO:0004190, GO:0005615, GO:0030163
Ce	K07H8.6a	0.829412	0.49465	Most-adapted genes
Ce	C45B2.2	0.829365	0.49	Most-adapted genes
Ce	T22E5.5	0.828994	0.544335	Most-adapted genes	GO:0005509, GO:0048598, GO:0003009, GO:0005861, GO:0006936, GO:0006937, GO:0045214, GO:0060048, GO:0005523, GO:0030899, GO:0030728, GO:0007413, GO:0007526
Ce	K07H8.6c	0.828835	0.494754	Most-adapted genes
Ce	F10E7.7	0.828136	0.538667	Most-adapted genes	GO:0003735, GO:0005840, GO:0006412, GO:0022625, GO:0002181, GO:0042273
Ce	C01B10.5a	0.82712	0.529101	Most-adapted genes
Ce	Y57G11C.15b	0.826835	0.51091	Most-adapted genes
Ce	C15H9.6a	0.826553	0.5	Most-adapted genes
Ce	Y105E8B.1o	0.826511	0.553216	Most-adapted genes
Ce	R05G6.7	0.825891	0.510563	Most-adapted genes	GO:0016020, GO:0016021, GO:0006811, GO:0055085, GO:0005739, GO:0015698, GO:0005741, GO:0007005, GO:0008308, GO:0015288, GO:0046930, GO:0098656
Ce	F13B10.2a	0.825777	0.524876	Most-adapted genes
Ce	Y105E8B.1d	0.825309	0.562573	Most-adapted genes
Ce	F52D10.3a	0.825104	0.543507	Most-adapted genes
Ce	F07A5.7a	0.824764	0.526155	Most-adapted genes
Ce	R09B3.3	0.824386	0.53876	Most-adapted genes	GO:0003676, GO:0003723, GO:0003729, GO:0005515, GO:0005847, GO:0098789
Ce	C01G6.1b	0.824103	0.529138	Most-adapted genes
Ce	Y41D4B.5	0.824013	0.520202	Most-adapted genes	GO:0005737, GO:0003735, GO:0005840, GO:0006412, GO:0005783, GO:0022627, GO:0005829, GO:0030490, GO:0000028, GO:0002181, GO:0005791, GO:0042788, GO:0098556
Ce	C01G6.1a	0.823381	0.52921	Most-adapted genes
Ce	F45F2.13	0.823292	0.552311	Most-adapted genes	GO:0005634, GO:0003677, GO:0046982, GO:0005694, GO:0000786
Ce	C09H10.2	0.823041	0.490566	Most-adapted genes	GO:0003735, GO:0005840, GO:0006412, GO:0022625
Ce	M18.1b	0.822892	0.570238	Most-adapted genes
Ce	F38A3.1	0.822704	0.561346	Most-adapted genes	GO:0016020, GO:0016021, GO:0042302
Ce	Y62E10A.1	0.822615	0.57958	Most-adapted genes	GO:0003735, GO:0005840, GO:0006414
Ce	H22K11.1	0.822424	0.489557	Most-adapted genes	GO:0005764, GO:0016787, GO:0005737, GO:0006508, GO:0008233, GO:0005576, GO:0004190, GO:0012501, GO:0030163, GO:0008219, GO:0070265
Ce	Y47D3B.6	0.822309	0.634568	Most-adapted genes
Ce	F32D1.2	0.821762	0.539394	Most-adapted genes	GO:0005743, GO:0016887, GO:0000275, GO:0015986, GO:0046933
Ce	F13B10.2c	0.821235	0.522599	Most-adapted genes
Ce	C34H4.4	0.820937	0.620339	Most-adapted genes	GO:0016020, GO:0016021, GO:0042302
Ce	F37C12.9	0.820051	0.544662	Most-adapted genes	GO:0000462, GO:0003735, GO:0005840, GO:0006412, GO:0003674, GO:0005575, GO:0000028, GO:0070181, GO:0048027
Ce	C53B4.5	0.820048	0.558621	Most-adapted genes	GO:0016020, GO:0016021, GO:0042302
Ce	F27D4.4b	0.819172	0.435897	Most-adapted genes
Ce	R09B3.2	0.818475	0.52381	Most-adapted genes	GO:0003676, GO:0003723, GO:0003729, GO:0005847, GO:0098789
Ce	F23H12.4a	0.817968	0.599338	Most-adapted genes
Ce	Y48B6A.2	0.817484	0.554348	Most-adapted genes	GO:0046872, GO:0003735, GO:0005840, GO:0006412
Ce	Y24D9A.4	0.817128	0.555138	Most-adapted genes	GO:0003723, GO:0005840, GO:0000470, GO:0005516, GO:0022625, GO:1990904, GO:0042254
Ce	C14B9.7	0.816861	0.520576	Most-adapted genes	GO:0003735, GO:0005840, GO:0006412, GO:0022625
Ce	F54E12.4	0.816608	0.52957	Most-adapted genes	GO:0003677, GO:0005634, GO:0046982, GO:0044877, GO:0005694, GO:0000786, GO:0006334
Ce	H02I12.6	0.816608	0.52957	Most-adapted genes	GO:0003677, GO:0005634, GO:0046982, GO:0044877, GO:0005694, GO:0000786, GO:0006334
Ce	D1007.6	0.816573	0.555556	Most-adapted genes	GO:0003723, GO:0005515, GO:0008340, GO:0003735, GO:0022627, GO:0000028
Ce	Y105E8B.1q	0.815843	0.549708	Most-adapted genes
Ce	C04F6.1	0.814956	0.467581	Most-adapted genes	GO:0005576, GO:0006869, GO:0005319, GO:0045735
Ce	F55C10.2	0.81493	0.542222	Most-adapted genes	GO:0016020, GO:0016021, GO:0042302
Ce	F08B12.4b	0.814606	0.530744	Most-adapted genes
Ce	Y106G6H.3c	0.814387	0.508772	Most-adapted genes
Ce	K04D7.1	0.814368	0.541922	Most-adapted genes	GO:0005634, GO:0043022, GO:0005829, GO:0009792, GO:0005840, GO:0005515, GO:0005080, GO:0005737, GO:0030424, GO:0030334, GO:0005635, GO:0022627, GO:0005813, GO:0044297, GO:0033365, GO:0000776, GO:0008045, GO:0040038, GO:0000281, GO:0030426, GO:0051304, GO:0072344, GO:0001934, GO:0019899
Ce	F26E4.9	0.813969	0.521303	Most-adapted genes	GO:0008340, GO:0019915, GO:0004129, GO:0006123, GO:0005740, GO:0042776
Ce	T23F2.5	0.813942	0.511494	Most-adapted genes	GO:0016020, GO:0016021
Ce	B0412.4	0.813696	0.555556	Most-adapted genes	GO:0008270, GO:0003735, GO:0005840, GO:0006412, GO:0022627
Ce	W03G11.1b	0.813115	0.570238	Most-adapted genes
Ce	F56E10.4	0.81249	0.543651	Most-adapted genes	GO:0003723, GO:0046872, GO:0003735, GO:0005840, GO:0006412, GO:0022627, GO:0000028
Ce	Y40B10A.1a	0.812454	0.522876	Most-adapted genes
Ce	F13B10.2d	0.812252	0.524123	Most-adapted genes
Ce	F53G12.10	0.812235	0.518367	Most-adapted genes	GO:0003723, GO:0003735, GO:0005840, GO:0022625, GO:0000463
Ce	T10C6.13	0.812103	0.557178	Most-adapted genes	GO:0005634, GO:0003677, GO:0046982, GO:0005694, GO:0000786
Ce	ZK1010.1	0.812067	0.511628	Most-adapted genes	GO:0005634, GO:0005737, GO:0016567, GO:0003735, GO:0005840, GO:0006412, GO:0031625, GO:0022627, GO:0031386, GO:0009949, GO:0015935, GO:0019941, GO:0005515
Ce	F20A1.1	0.812004	0.505848	Most-adapted genes
Ce	F59D8.1	0.811375	0.466542	Most-adapted genes	GO:0005576, GO:0006869, GO:0005319, GO:0045735
Ce	F42C5.8a	0.811323	0.523126	Most-adapted genes
Ce	K03A1.1	0.811237	0.552311	Most-adapted genes	GO:0005634, GO:0003677, GO:0046982, GO:0005694, GO:0000786
Ce	F07B7.5	0.810965	0.557178	Most-adapted genes	GO:0005634, GO:0003677, GO:0046982, GO:0005694, GO:0000786
Ce	K06C4.13	0.810965	0.557178	Most-adapted genes	GO:0005634, GO:0003677, GO:0046982, GO:0005694, GO:0000786
Ce	F40F11.1	0.8107	0.514957	Most-adapted genes	GO:0003735, GO:0005840, GO:0006412, GO:0008340, GO:0022627
Ce	K06C4.5	0.810636	0.559611	Most-adapted genes	GO:0005634, GO:0003677, GO:0046982, GO:0005694, GO:0000786
Ce	T06E4.6	0.810476	0.564719	Most-adapted genes	GO:0016020, GO:0016021, GO:0042302
Ce	B0035.7	0.81015	0.536458	Most-adapted genes	GO:0003677, GO:0005634, GO:0000790, GO:0046982, GO:0006325, GO:0006281, GO:0006342, GO:0005694, GO:0006355, GO:0000786
Ce	F54E12.5a	0.81015	0.536458	Most-adapted genes
Ce	H02I12.7	0.81015	0.536458	Most-adapted genes	GO:0003677, GO:0005634, GO:0000790, GO:0046982, GO:0006325, GO:0006281, GO:0006342, GO:0005694, GO:0006355, GO:0000786
Ce	F15H10.1	0.810147	0.548896	Most-adapted genes	GO:0005581, GO:0042302
Ce	C26F1.4	0.810059	0.544529	Most-adapted genes	GO:0003735, GO:0005840, GO:0006412, GO:0022627, GO:0005515
Ce	W09H1.2	0.809735	0.553191	Most-adapted genes	GO:0003677, GO:0005634, GO:0046982, GO:0005694, GO:0000786
Ce	T04C12.5	0.809134	0.515473	Most-adapted genes	GO:0000166, GO:0005737, GO:0005524, GO:0015629, GO:0005856, GO:0009792, GO:0005938, GO:0040011, GO:0030866, GO:0005884, GO:0000281, GO:0007111
Ce	B0035.8	0.808985	0.526882	Most-adapted genes	GO:0003677, GO:0005634, GO:0046982, GO:0044877, GO:0005694, GO:0000786, GO:0006334
Ce	F08G2.1	0.808617	0.514905	Most-adapted genes	GO:0003677, GO:0005634, GO:0046982, GO:0044877, GO:0000785, GO:0005694, GO:0000786, GO:0006334
Ce	ZK131.5	0.808617	0.514905	Most-adapted genes	GO:0003677, GO:0005634, GO:0046982, GO:0044877, GO:0000785, GO:0005694, GO:0000786, GO:0006334
Ce	ZK131.9	0.808617	0.514905	Most-adapted genes	GO:0003677, GO:0005634, GO:0046982, GO:0044877, GO:0000785, GO:0005694, GO:0000786, GO:0006334
Ce	F54C9.5	0.808448	0.524943	Most-adapted genes	GO:0003723, GO:0005634, GO:0005737, GO:0003735, GO:0005840, GO:0006412, GO:0000027, GO:0022625, GO:0019843, GO:0008097
Ce	Y38A10A.5	0.807801	0.511785	Most-adapted genes	GO:0005509, GO:0046872, GO:0030246, GO:0005789, GO:0005783, GO:0006457, GO:0005737, GO:0030421, GO:0030968, GO:0012501, GO:0009408, GO:0031581, GO:0010468, GO:0048609, GO:0051082, GO:0005788, GO:0045471, GO:1903204, GO:0005515
Ce	Y45F10D.12	0.807522	0.578483	Most-adapted genes	GO:0003723, GO:0005737, GO:0003735, GO:0005840, GO:0006412, GO:0022625
Ce	T13B5.4	0.807083	0.623762	Most-adapted genes	GO:0005576, GO:0005581, GO:0042302, GO:0040002
Ce	C06B8.8	0.806492	0.507042	Most-adapted genes	GO:0003735, GO:0005840, GO:0006412, GO:0022625, GO:0022618
Ce	Y105E8B.1b	0.805767	0.56701	Most-adapted genes
Ce	F07B7.4	0.805698	0.516129	Most-adapted genes	GO:0003677, GO:0005634, GO:0046982, GO:0044877, GO:0005694, GO:0000786, GO:0006334
Ce	F07B7.11	0.805698	0.516129	Most-adapted genes	GO:0003677, GO:0005634, GO:0046982, GO:0044877, GO:0005694, GO:0000786, GO:0006334
Ce	K06C4.4	0.805698	0.516129	Most-adapted genes	GO:0003677, GO:0005634, GO:0046982, GO:0044877, GO:0005694, GO:0000786, GO:0006334
Ce	K06C4.12	0.805698	0.516129	Most-adapted genes	GO:0003677, GO:0005634, GO:0046982, GO:0044877, GO:0005694, GO:0000786, GO:0006334
Ce	Y57G11C.15a	0.805417	0.511252	Most-adapted genes
Ce	Y67H2A.5	0.805357	0.522831	Most-adapted genes	GO:0016020, GO:0016021, GO:0005737, GO:0005635, GO:0005739
Ce	C49H3.11	0.805209	0.576313	Most-adapted genes	GO:0003723, GO:0003735, GO:0005840, GO:0006412, GO:0022627, GO:0015935
Ce	F59D8.2	0.805177	0.465503	Most-adapted genes	GO:0005576, GO:0006869, GO:0005319, GO:0045735
Ce	F55C10.3	0.805176	0.541111	Most-adapted genes	GO:0005581, GO:0042302
Ce	F25H5.4b	0.805072	0.503765	Most-adapted genes
Ce	F11G11.2	0.804443	0.491143	Most-adapted genes	GO:0016740, GO:0004364, GO:0006749, GO:0045087, GO:0005575, GO:0005515
Ce	F45F2.12	0.804383	0.516129	Most-adapted genes	GO:0003677, GO:0005634, GO:0046982, GO:0044877, GO:0005694, GO:0000786, GO:0006334
Ce	C52D10.13	0.804086	0.583924	Most-adapted genes	GO:0016020, GO:0016021, GO:0042302
Ce	B0491.2	0.804068	0.531282	Most-adapted genes	GO:0005581, GO:0042302, GO:0040002, GO:0042338, GO:0042329, GO:0042335, GO:0060102
Ce	Y105E8B.1j	0.80392	0.559829	Most-adapted genes
Ce	F17E9.10	0.803803	0.564477	Most-adapted genes	GO:0005634, GO:0003677, GO:0046982, GO:0005694, GO:0000786
Ce	Y37E3.8b	0.80371	0.516854	Most-adapted genes
Ce	F54D1.2	0.80346	0.532203	Most-adapted genes	GO:0042302
Ce	F54D1.3	0.80346	0.532203	Most-adapted genes	GO:0042302
Ce	ZK829.4	0.803173	0.507138	Most-adapted genes	GO:0000166, GO:0005739, GO:0016491, GO:0055114, GO:0006520, GO:0016639, GO:0004352, GO:0006538
Ce	T06E4.14	0.802842	0.59697	Most-adapted genes
Ce	C44C10.1	0.802222	0.591362	Most-adapted genes	GO:0016020, GO:0016021, GO:0042302
Ce	F25H5.4a	0.802167	0.504103	Most-adapted genes
Ce	Y41E3.10a	0.802154	0.534091	Most-adapted genes
Ce	C52E4.1	0.802048	0.50404	Most-adapted genes	GO:0005764, GO:0016787, GO:0006508, GO:0008233, GO:0005615, GO:0004197, GO:0008234, GO:0051603
Ce	C09G5.4	0.802011	0.582305	Most-adapted genes	GO:0005581, GO:0042302
Ce	C49F5.1	0.801833	0.513201	Most-adapted genes	GO:0005524, GO:0046872, GO:0000166, GO:0016740, GO:0005829, GO:0005515, GO:0006730, GO:0004478, GO:0006556, GO:0010888
Ce	F46H5.3a	0.801736	0.528967	Most-adapted genes
Ce	Y106G6H.3a	0.801591	0.508621	Most-adapted genes
Ce	F22A3.6c	0.801502	0.498551	Most-adapted genes
Ce	F20H11.3	0.800416	0.512671	Most-adapted genes	GO:0005737, GO:0003824, GO:0005739, GO:0016491, GO:0055114, GO:0005975, GO:0006099, GO:0016616, GO:0019752, GO:0005759, GO:0006108, GO:0016615, GO:0030060
Ce	ZK180.5a	0.80025	0.59116	Most-adapted genes
Ce	C56C10.8	0.800017	0.489712	Most-adapted genes	GO:0005634, GO:0005829, GO:0009792, GO:0005515, GO:0005739, GO:0043066, GO:0042788, GO:0005854
Ce	Y57G11C.16	0.799832	0.522581	Most-adapted genes	GO:0003723, GO:0003676, GO:0005829, GO:0003735, GO:0005840, GO:0006412, GO:0015935
Ce	Y105E8B.1g	0.799792	0.549708	Most-adapted genes
Ce	F37C12.4	0.798854	0.526984	Most-adapted genes	GO:0005737, GO:0003735, GO:0005840, GO:0006412, GO:0005515, GO:0022625, GO:0005829, GO:0002181
Ce	Y49E10.6a	0.798677	0.569343	Most-adapted genes
Ce	F08B12.4i	0.798343	0.528455	Most-adapted genes
Ce	F22F1.1	0.79822	0.523126	Most-adapted genes	GO:0005634, GO:0003677, GO:0042025, GO:0003690, GO:0006355, GO:0005694, GO:0000786, GO:0006334, GO:0016584, GO:0030261, GO:0031492, GO:0031936, GO:0045910
Ce	T05G5.10b	0.798204	0.512346	Most-adapted genes
Ce	R11D1.8	0.797156	0.55643	Most-adapted genes	GO:0003735, GO:0005840, GO:0006412, GO:0022625
Ce	F10B5.1	0.797133	0.51938	Most-adapted genes	GO:0003735, GO:0005840, GO:0006412, GO:0000027, GO:0022625
Ce	F59B8.2c	0.796974	0.493056	Most-adapted genes
Ce	W02D3.5	0.796959	0.45098	Most-adapted genes	GO:0008289, GO:0005515
Ce	M117.2a	0.796954	0.514056	Most-adapted genes
Ce	Y51A2D.14	0.796602	0.49697	Most-adapted genes
Ce	Y48B6A.14	0.796059	0.565972	Most-adapted genes	GO:0005737, GO:0005634, GO:0006357, GO:0003677, GO:0045944, GO:0000790, GO:0008134, GO:0006355, GO:0006338, GO:0006310, GO:0008301, GO:0045089
Ce	R151.3	0.795846	0.506116	Most-adapted genes	GO:0003723, GO:0005737, GO:0003735, GO:0005840, GO:0006412, GO:0000027, GO:0005515, GO:0005783, GO:0022625, GO:0008340, GO:0005829, GO:0002181, GO:0005791
Ce	ZK1193.1	0.795787	0.56092	Most-adapted genes	GO:0005576, GO:0005581, GO:0042302, GO:0060102, GO:0042338, GO:0042329, GO:0040002, GO:0060107, GO:0060111
Ce	JC8.3c	0.795469	0.496732	Most-adapted genes
Ce	F17C11.9a	0.794764	0.483709	Most-adapted genes
Ce	ZK354.10	0.794469	0.504274	Most-adapted genes
Ce	F55G1.2	0.793426	0.537713	Most-adapted genes	GO:0005634, GO:0003677, GO:0046982, GO:0005694, GO:0000786
Ce	C44E4.6	0.793081	0.517241	Most-adapted genes	GO:0000062, GO:0008289, GO:0008340, GO:0019915
Ce	F54D8.1	0.792647	0.551464	Most-adapted genes	GO:0042302, GO:0042338
Ce	F11G11.11	0.792476	0.567474	Most-adapted genes	GO:0016020, GO:0016021, GO:0042302
Ce	F11C7.5	0.792434	0.552632	Most-adapted genes	GO:0005112, GO:0005615, GO:0001708, GO:0040025, GO:0045747, GO:0006970, GO:0045177
Ce	F17C11.9c	0.792165	0.486339	Most-adapted genes
Ce	Y71F9AL.13b	0.79199	0.523504	Most-adapted genes
Ce	Y105E8B.1k	0.791936	0.557717	Most-adapted genes
Ce	F46E10.10	0.791782	0.513353	Most-adapted genes	GO:0003824, GO:0016491, GO:0055114, GO:0005975, GO:0005829, GO:0016616, GO:0019752, GO:0006099, GO:0006108, GO:0016615, GO:0030060, GO:0006734, GO:0006107
Ce	C04G2.4	0.791307	0.497396	Most-adapted genes	GO:0005737, GO:0005856, GO:0042995, GO:0031143
Ce	W02A2.3a	0.791141	0.531826	Most-adapted genes
Ce	T15B7.4	0.79084	0.582822	Most-adapted genes	GO:0016020, GO:0016021, GO:0042302
Ce	ZK652.4	0.790176	0.532258	Most-adapted genes	GO:0003729, GO:0003735, GO:0005840, GO:0006412, GO:0022625, GO:0000463
Ce	B0250.1	0.790141	0.550447	Most-adapted genes	GO:0003723, GO:0005737, GO:0003735, GO:0005840, GO:0006412, GO:0022625, GO:0002181, GO:0019843
Ce	K09F5.2	0.789977	0.484436	Most-adapted genes	GO:0005576, GO:0006869, GO:0005319, GO:0045735
Ce	T11F9.9	0.789877	0.543333	Most-adapted genes	GO:0016020, GO:0016021, GO:0042302
Ce	T24B8.1a	0.789871	0.533333	Most-adapted genes
Ce	Y71F9AL.13a	0.789834	0.52381	Most-adapted genes
Ce	Y105E8A.16	0.789648	0.562147	Most-adapted genes	GO:0003735, GO:0005840, GO:0006412, GO:0022627, GO:0015935
Ce	C24F3.6	0.789478	0.563927	Most-adapted genes	GO:0016020, GO:0016021, GO:0042302
Ce	F13D12.4a	0.789455	0.532443	Most-adapted genes
Ce	C17H12.14	0.789378	0.478708	Most-adapted genes	GO:0005886, GO:1902600, GO:0005737, GO:0008553, GO:0016324, GO:0046961, GO:0033178
Ce	C32E8.2a	0.789261	0.552885	Most-adapted genes
Ce	Y65B4BR.5	0.788897	0.535714	Most-adapted genes	GO:0005737, GO:0015031, GO:0005515, GO:0006612, GO:0051082, GO:0005854
Ce	Y105E8B.1e	0.788441	0.559014	Most-adapted genes
Ce	C01F6.9c	0.788399	0.45977	Most-adapted genes
Ce	F43D9.4	0.788293	0.55	Most-adapted genes	GO:0009792, GO:0008340, GO:0005829, GO:0009408, GO:0051082, GO:0019538
Ce	F36A2.6	0.78738	0.506579	Most-adapted genes	GO:0003723, GO:0003735, GO:0005840, GO:0006412, GO:0008340, GO:0022627, GO:0015935, GO:0000028
Ce	T06E4.4	0.787047	0.57732	Most-adapted genes	GO:0016020, GO:0016021, GO:0042302
Ce	M195.1	0.786687	0.560656	Most-adapted genes	GO:0016020, GO:0016021, GO:0042302
Ce	T24B8.1b	0.786645	0.528455	Most-adapted genes
Ce	T03E6.7a	0.78662	0.519724	Most-adapted genes
Ce	F08B12.4g	0.786513	0.53012	Most-adapted genes
Ce	C53H9.1	0.785741	0.498783	Most-adapted genes	GO:0005737, GO:0003735, GO:0005840, GO:0006412, GO:0005783, GO:0022625, GO:0005829, GO:0005791, GO:0098556, GO:0015934
Ce	F45F2.3	0.784917	0.535256	Most-adapted genes	GO:0003677, GO:0005634, GO:0042025, GO:0046982, GO:0005694, GO:0000786, GO:0006334
Ce	Y71H2AM.5	0.78453	0.521858	Most-adapted genes	GO:0005739
Ce	F45F2.4	0.784479	0.528646	Most-adapted genes	GO:0003677, GO:0005634, GO:0000790, GO:0046982, GO:0006325, GO:0006281, GO:0006342, GO:0005694, GO:0006355, GO:0000786
Ce	F44E5.1	0.784461	0.548523	Most-adapted genes
Ce	C03A7.14	0.784441	0.517937	Most-adapted genes	GO:0060465, GO:0030968
Ce	T10C6.11	0.784251	0.513441	Most-adapted genes	GO:0003677, GO:0005634, GO:0046982, GO:0044877, GO:0005694, GO:0000786, GO:0006334
Ce	K09F5.3	0.784151	0.525641	Most-adapted genes
Ce	F53A9.6	0.783912	0.521073	Most-adapted genes	GO:0045087, GO:0097501
Ce	T07A5.5	0.783434	0.481481	Most-adapted genes	GO:0016020, GO:0016021, GO:0016740
Ce	F11E6.3	0.78186	0.568401	Most-adapted genes
Ce	ZC155.1	0.781697	0.522188	Most-adapted genes	GO:0005509, GO:0005737, GO:0001786, GO:0005544, GO:0005886, GO:0043652, GO:0005545, GO:0008201, GO:0008429, GO:0043231
Ce	F28H1.2	0.781246	0.5338	Most-adapted genes	GO:0030016, GO:0005515
Ce	F15H10.2	0.78067	0.549947	Most-adapted genes	GO:0005581, GO:0042302
Ce	ZC513.8	0.780617	0.588816	Most-adapted genes	GO:0016020, GO:0016021, GO:0005581, GO:0042302
Ce	F07B7.9	0.780363	0.535256	Most-adapted genes	GO:0003677, GO:0005634, GO:0042025, GO:0046982, GO:0005694, GO:0000786, GO:0006334
Ce	K06C4.2	0.780363	0.535256	Most-adapted genes	GO:0003677, GO:0005634, GO:0042025, GO:0046982, GO:0005694, GO:0000786, GO:0006334
Ce	ZK673.7	0.780166	0.461698	Most-adapted genes	GO:0005509, GO:0046872, GO:0050790, GO:0000226, GO:0019722, GO:0030234, GO:0031013
Ce	C04F12.4	0.780063	0.517157	Most-adapted genes	GO:0003723, GO:0003735, GO:0005840, GO:0006412, GO:0022625, GO:0042273
Ce	E04F6.9	0.780046	0.459948	Most-adapted genes
Ce	C26F1.9	0.779527	0.474359	Most-adapted genes	GO:0003735, GO:0005840, GO:0006412, GO:0022625
Ce	F07B7.3	0.7795	0.526042	Most-adapted genes	GO:0003677, GO:0005634, GO:0000790, GO:0046982, GO:0006325, GO:0006281, GO:0006342, GO:0005694, GO:0006355, GO:0000786
Ce	F07B7.10	0.7795	0.526042	Most-adapted genes	GO:0003677, GO:0005634, GO:0000790, GO:0046982, GO:0006325, GO:0006281, GO:0006342, GO:0005694, GO:0006355, GO:0000786
Ce	K06C4.3	0.7795	0.526042	Most-adapted genes	GO:0003677, GO:0005634, GO:0000790, GO:0046982, GO:0006325, GO:0006281, GO:0006342, GO:0005694, GO:0006355, GO:0000786
Ce	K06C4.11	0.7795	0.526042	Most-adapted genes	GO:0003677, GO:0005634, GO:0000790, GO:0046982, GO:0006325, GO:0006281, GO:0006342, GO:0005694, GO:0006355, GO:0000786
Ce	R11A5.4c	0.779177	0.477324	Most-adapted genes
Ce	Y105E8B.1r	0.778728	0.540351	Most-adapted genes
Ce	C38C3.5	0.778114	0.533769	Most-adapted genes	GO:0005737, GO:0003779, GO:0015629, GO:0051015, GO:0009792, GO:0040011, GO:0005865, GO:0030838, GO:1990904, GO:0048870, GO:0030240, GO:0030042, GO:0051014
Ce	C34E10.6	0.776989	0.514533	Most-adapted genes	GO:0016020, GO:0005524, GO:0006811, GO:0000166, GO:0005515, GO:0005739, GO:0005743, GO:0048598, GO:1902600, GO:0005929, GO:0042995, GO:0097730, GO:0016887, GO:0002119, GO:0019904, GO:0008406, GO:0030421, GO:0008340, GO:0040024, GO:0010629, GO:0007617, GO:0040039, GO:0007610, GO:0043050, GO:0015986, GO:0046933, GO:0005753, GO:0006754, GO:0045261, GO:0042776, GO:0046034
Ce	F17E9.13	0.776981	0.497396	Most-adapted genes	GO:0003677, GO:0005634, GO:0000790, GO:0046982, GO:0006325, GO:0006281, GO:0006342, GO:0005694, GO:0006355, GO:0000786
Ce	F35H10.1	0.776981	0.497396	Most-adapted genes	GO:0003677, GO:0005634, GO:0000790, GO:0046982, GO:0006325, GO:0006281, GO:0006342, GO:0005694, GO:0006355, GO:0000786
Ce	C36E8.5	0.776683	0.529194	Most-adapted genes	GO:0005525, GO:0005737, GO:0000166, GO:0003924, GO:0000278, GO:0005856, GO:0005874, GO:0007017, GO:0005200, GO:0000226, GO:0000212, GO:0005876, GO:0045298
Ce	F09F7.8	0.776682	0.521073	Most-adapted genes
Ce	R11A5.4d	0.7763	0.479806	Most-adapted genes
Ce	F31C3.1	0.77605	0.536585	Most-adapted genes	GO:0005737, GO:0043231, GO:0016853, GO:0000413, GO:0003755, GO:0006457, GO:0016018
Ce	T21B10.2a	0.775614	0.498084	Most-adapted genes
Ce	T21H3.1b	0.775597	0.521628	Most-adapted genes
Ce	C34F6.2	0.775501	0.545775	Most-adapted genes	GO:0016020, GO:0016021, GO:0030198, GO:0005615, GO:0042302, GO:0005201, GO:0031012
Ce	F36H1.1b	0.775004	0.47619	Most-adapted genes
Ce	R11A5.4a	0.774983	0.47888	Most-adapted genes
Ce	F54C9.4	0.774539	0.502315	Most-adapted genes	GO:0042302
Ce	F08G2.2	0.774491	0.53125	Most-adapted genes	GO:0003677, GO:0005634, GO:0000790, GO:0046982, GO:0006325, GO:0006281, GO:0006342, GO:0005694, GO:0006355, GO:0000786
Ce	ZK131.6	0.774491	0.53125	Most-adapted genes	GO:0003677, GO:0005634, GO:0000790, GO:0046982, GO:0006325, GO:0006281, GO:0006342, GO:0005694, GO:0006355, GO:0000786
Ce	ZK131.10	0.774491	0.528646	Most-adapted genes	GO:0003677, GO:0005634, GO:0000790, GO:0046982, GO:0006325, GO:0006281, GO:0006342, GO:0005694, GO:0006355, GO:0000786
Ce	W07B8.5	0.774151	0.537198	Most-adapted genes	GO:0005764, GO:0016787, GO:0006508, GO:0008233, GO:0005615, GO:0004197, GO:0008234, GO:0051603
Ce	C53C9.2	0.774127	0.505025	Most-adapted genes
Ce	Y71F9AM.6	0.773756	0.52584	Most-adapted genes	GO:0016020, GO:0016021, GO:0005783, GO:0005789
Ce	M117.2b	0.773637	0.503937	Most-adapted genes
Ce	T13F2.10	0.773539	0.515625	Most-adapted genes	GO:0005737, GO:0005856, GO:0042995, GO:0031143, GO:0001556, GO:0045987, GO:0043410
Ce	D2092.8	0.773394	0.567901	Most-adapted genes
Ce	T25C8.2	0.773283	0.531915	Most-adapted genes	GO:0000166, GO:0005737, GO:0005524, GO:0015629, GO:0005856, GO:0002119, GO:0035148, GO:0030536, GO:1990357, GO:1904000, GO:0030033, GO:0097516
Ce	C03A7.8	0.773048	0.51101	Most-adapted genes	GO:0005515, GO:0060465, GO:0030968
Ce	K06C4.10	0.772736	0.532051	Most-adapted genes	GO:0003677, GO:0005634, GO:0042025, GO:0046982, GO:0005694, GO:0000786, GO:0006334
Ce	Y18D10A.19	0.772263	0.547401	Most-adapted genes	GO:0005737, GO:0016853, GO:0000413, GO:0003755, GO:0061077
Ce	ZK354.1	0.772201	0.520833	Most-adapted genes	GO:0005737, GO:0005856, GO:0042995, GO:0031143
Ce	T28D9.1	0.772142	0.558974	Most-adapted genes
Ce	Y59E9AR.1	0.771888	0.508906	Most-adapted genes	GO:0005856
Ce	Y59E9AR.7	0.771888	0.508906	Most-adapted genes	GO:0005856
Ce	M18.1a	0.771841	0.542406	Most-adapted genes
Ce	R06C7.10	0.771046	0.472408	Most-adapted genes	GO:0005524, GO:0000166, GO:0005737, GO:0051015, GO:0003779, GO:0003774, GO:0016459, GO:0005863, GO:0008307, GO:0043050, GO:0006936, GO:0030016, GO:0032982
Ce	T05F1.3	0.770862	0.526077	Most-adapted genes	GO:0003723, GO:0003735, GO:0005840, GO:0006412, GO:0022627, GO:0000028
Ce	H06I04.4b	0.770235	0.548611	Most-adapted genes
Ce	T05A1.2	0.769797	0.586932	Most-adapted genes	GO:0016020, GO:0016021, GO:0042302
Ce	Y105E8B.1i	0.769647	0.54811	Most-adapted genes
Ce	F21F8.3	0.769454	0.492386	Most-adapted genes	GO:0016787, GO:0006508, GO:0008233, GO:0004190, GO:0030163
Ce	R11.4	0.769453	0.505051	Most-adapted genes	GO:0016020, GO:0016021
Ce	F22A3.6a	0.768719	0.502381	Most-adapted genes
Ce	F08B12.4a	0.768361	0.507003	Most-adapted genes
Ce	Y55B1AR.1	0.767589	0.512472	Most-adapted genes	GO:0030246, GO:0016936, GO:0005737
Ce	K07F5.3	0.767563	0.505208	Most-adapted genes	GO:0005737, GO:0005856, GO:0042995, GO:0031143
Ce	T01C3.6	0.767534	0.547126	Most-adapted genes	GO:0003723, GO:0000462, GO:0003735, GO:0005840, GO:0006412, GO:0005515, GO:0022627, GO:0015935
Ce	T05D4.1	0.766564	0.542805	Most-adapted genes	GO:0003824, GO:0016829, GO:0005829, GO:0005737, GO:0005783, GO:0055120, GO:0006096, GO:0030017, GO:0030388, GO:0042802, GO:0005720, GO:0004332
Ce	M28.5	0.766061	0.511628	Most-adapted genes	GO:0003723, GO:0005634, GO:0000398, GO:0046540, GO:0071011, GO:0005730, GO:0000470, GO:0032040, GO:0006397, GO:0008380, GO:0005681, GO:0030490, GO:1990904, GO:0042254, GO:0031428
Ce	M01F1.2	0.765759	0.517241	Most-adapted genes	GO:0003729, GO:0003735, GO:0005840, GO:0006412, GO:0017148, GO:0022625, GO:0015934
Ce	C03A7.4	0.765685	0.506427	Most-adapted genes	GO:0060465, GO:0030968
Ce	T18D3.4	0.765547	0.49384	Most-adapted genes	GO:0005524, GO:0000166, GO:0005737, GO:0051015, GO:0003779, GO:0003774, GO:0016459, GO:0000146, GO:0006936, GO:0005859, GO:0030016, GO:0032982
Ce	Y47D7A.15	0.76462	0.594966	Most-adapted genes
Ce	C03A7.7	0.764568	0.508997	Most-adapted genes	GO:0060465, GO:0030968
Ce	F20B6.2	0.764556	0.49458	Most-adapted genes	GO:0005524, GO:0006811, GO:0016787, GO:1902600, GO:0043068, GO:0001666, GO:0060142, GO:0051453, GO:0046034, GO:0008219, GO:0015988, GO:0033180, GO:0046961, GO:0098609
Ce	T15B7.3	0.764485	0.578125	Most-adapted genes	GO:0016020, GO:0016021, GO:0042302
Ce	F40F8.10	0.764261	0.542105	Most-adapted genes	GO:0003723, GO:0003735, GO:0005840, GO:0006412, GO:0022627, GO:0015935, GO:0019843, GO:0045903
Ce	F32B6.6	0.764085	0.513021	Most-adapted genes	GO:0005737, GO:0005856, GO:0042995, GO:0031143, GO:0001556, GO:0045987, GO:0043410
Ce	F52B5.6	0.764023	0.496599	Most-adapted genes	GO:0003723, GO:0003735, GO:0005840, GO:0006412, GO:0000027, GO:0022625, GO:0019843
Ce	K12D12.3	0.763841	0.562874	Most-adapted genes	GO:0030198, GO:0005615, GO:0042302, GO:0005201, GO:0031012
Ce	F26E4.8b	0.763718	0.511355	Most-adapted genes
Ce	Y105E8B.1t	0.7637	0.553826	Most-adapted genes
Ce	B0365.3	0.763589	0.472752	Most-adapted genes	GO:0016020, GO:0016021, GO:0005524, GO:0006811, GO:0000166, GO:0046872, GO:0006813, GO:0005886, GO:1990573, GO:0005391, GO:0006883, GO:0030007, GO:0036376, GO:1902600, GO:0000003, GO:0001508, GO:0006814, GO:0006937, GO:0008556, GO:0010248, GO:0042391
Ce	R12E2.14	0.7633	0.595556	Most-adapted genes
Ce	ZK1067.7	0.763004	0.511586	Most-adapted genes	GO:0060465
Ce	F52B11.4	0.762831	0.554098	Most-adapted genes	GO:0016020, GO:0016021, GO:0042302
Ce	F54C1.7	0.762708	0.479424	Most-adapted genes	GO:0005509, GO:0009792, GO:0050790, GO:0000226, GO:0019722, GO:0030234, GO:0008307, GO:0006936, GO:0043292, GO:0030240, GO:0031013
Ce	T24B8.3b	0.762594	0.504762	Most-adapted genes
Ce	Y48G8AL.12	0.7625	0.616034	Most-adapted genes
Ce	W01D2.1	0.762371	0.537634	Most-adapted genes	GO:0003723, GO:0046872, GO:0003735, GO:0005840, GO:0006412, GO:0022625, GO:0019843
Ce	F26E4.8a	0.762138	0.513333	Most-adapted genes
Ce	T23D8.6	0.762044	0.528646	Most-adapted genes	GO:0003677, GO:0005634, GO:0000790, GO:0046982, GO:0006325, GO:0006281, GO:0006342, GO:0005694, GO:0006355, GO:0000786
Ce	W08E12.7	0.762036	0.505952	Most-adapted genes	GO:0005737, GO:0005730, GO:0003676
Ce	ZK354.4	0.762023	0.515625	Most-adapted genes	GO:0005737, GO:0005856, GO:0042995, GO:0031143
Ce	Y69A2AR.18	0.761819	0.514444	Most-adapted genes	GO:0015986, GO:0046933, GO:0045261, GO:0000275, GO:0006754
Ce	T24B8.3a	0.761404	0.503145	Most-adapted genes
Ce	T22F3.3d	0.761218	0.509409	Most-adapted genes
Ce	T27E9.2	0.761198	0.504386	Most-adapted genes	GO:0016020, GO:0055114, GO:0005739, GO:0005743, GO:0005750, GO:0006122, GO:0008121, GO:0070469, GO:0009060
Ce	Y2H9A.3	0.761063	0.555936	Most-adapted genes	GO:0016020, GO:0016021, GO:0042302
Ce	T13F2.11	0.760853	0.510417	Most-adapted genes	GO:0005737, GO:0005856, GO:0042995, GO:0031143
Ce	M03F4.7a	0.760754	0.495238	Most-adapted genes
Ce	R08C7.3	0.760749	0.539007	Most-adapted genes	GO:0003677, GO:0005634, GO:0000790, GO:0046982, GO:0006325, GO:0006342, GO:0009996, GO:0005694, GO:0000793, GO:0000785, GO:0000786, GO:0045892
Ce	Y48A6B.4	0.760651	0.493056	Most-adapted genes
Ce	Y48G8AL.16	0.760425	0.578947	Most-adapted genes
Ce	T22F3.4b	0.760377	0.497354	Most-adapted genes
Ce	F59B8.2a	0.760255	0.485069	Most-adapted genes
Ce	Y48G8AL.8	0.76022	0.558511	Most-adapted genes	GO:0003735, GO:0005840, GO:0006412, GO:0022625, GO:0002181, GO:0015934
Ce	C54C6.1	0.760051	0.532609	Most-adapted genes	GO:0003723, GO:0046872, GO:0003735, GO:0005840, GO:0006412, GO:0022625, GO:0019843
Ce	F36H12.7	0.759676	0.502604	Most-adapted genes	GO:0005737, GO:0005856, GO:0042995, GO:0031143
Ce	W01A11.4	0.759373	0.488774	Most-adapted genes	GO:0030246, GO:0016936, GO:0005737, GO:0045177, GO:0051861
Ce	ZK1251.6	0.758809	0.5	Most-adapted genes	GO:0005737, GO:0005856, GO:0042995, GO:0031143
Ce	F54E12.5c	0.758699	0.537713	Most-adapted genes
Ce	F53A9.10	0.75822	0.519814	Most-adapted genes	GO:0005509, GO:0003009, GO:0005861, GO:0006936, GO:0006937, GO:0045214, GO:0060048, GO:0005523, GO:0030899
Ce	C33F10.9	0.758152	0.505208	Most-adapted genes	GO:0005737, GO:0005856, GO:0042995, GO:0031143
Ce	R12E2.15	0.757585	0.582222	Most-adapted genes
Ce	B0213.17	0.757124	0.555556	Most-adapted genes	GO:0007218
Ce	F17C11.9b	0.757098	0.476827	Most-adapted genes
Ce	Y22D7AL.10	0.756907	0.553517	Most-adapted genes	GO:0005524, GO:0005759, GO:0051082, GO:0051085, GO:0051087, GO:0006457, GO:0046872
Ce	C18A11.7b	0.756585	0.495385	Most-adapted genes
Ce	F08B12.4h	0.756505	0.526882	Most-adapted genes
Ce	F57F5.1	0.756486	0.469697	Most-adapted genes	GO:0005764, GO:0016787, GO:0006508, GO:0008233, GO:0005615, GO:0004197, GO:0008234, GO:0051603
Ce	K07F5.2	0.756087	0.5	Most-adapted genes	GO:0005737, GO:0005856, GO:0042995, GO:0031143
Ce	K08F4.8	0.755938	0.5	Most-adapted genes	GO:0005737, GO:0005856, GO:0042995, GO:0031143, GO:0001556, GO:0045987
Ce	K12F2.1	0.754865	0.464298	Most-adapted genes	GO:0005524, GO:0000166, GO:0005737, GO:0003774, GO:0051015, GO:0003779, GO:0016459, GO:0005863, GO:0031672, GO:0030016, GO:0032982, GO:0060279, GO:0007626, GO:0005515
Ce	T26A5.9	0.754744	0.492593	Most-adapted genes	GO:0005634, GO:0005737, GO:0003774, GO:0005856, GO:0005874, GO:0007017, GO:0030286, GO:0045505, GO:0051959, GO:2000582, GO:0007049, GO:0005515, GO:0051301, GO:0005868, GO:0006915, GO:0051321, GO:0005635, GO:0005875
Ce	Y105E8B.1p	0.754737	0.527485	Most-adapted genes
Ce	B0546.1	0.753742	0.60303	Most-adapted genes	GO:0005739, GO:0051117, GO:0006783, GO:0032780, GO:0042030, GO:0045980
Ce	Y73B6BL.9a	0.753491	0.538194	Most-adapted genes
Ce	ZK354.11	0.753212	0.510417	Most-adapted genes	GO:0005737, GO:0005856, GO:0042995, GO:0031143
Ce	T25F10.6a	0.753203	0.52498	Most-adapted genes
Ce	F57B9.6b	0.752955	0.468391	Most-adapted genes
Ce	R11A5.4b	0.752737	0.481481	Most-adapted genes
Ce	T22F3.4a	0.752717	0.500846	Most-adapted genes
Ce	T08A9.7	0.752527	0.438944	Most-adapted genes	GO:0045087, GO:0050829, GO:0042802, GO:0032991, GO:0050830
Ce	C03G5.1	0.752501	0.506955	Most-adapted genes	GO:0016020, GO:0009055, GO:0016491, GO:0055114, GO:0016627, GO:0050660, GO:0006099, GO:0005739, GO:0005743, GO:0000104, GO:0005749, GO:0006121, GO:0008177, GO:0022900
Ce	C01B10.5b	0.752359	0.502488	Most-adapted genes
Ce	C37H5.8	0.752256	0.491388	Most-adapted genes	GO:0005524, GO:0005737, GO:0000166, GO:0005739, GO:0016887, GO:0006986, GO:0031072, GO:0034620, GO:0042026, GO:0044183, GO:0051082, GO:0051085, GO:0051787, GO:0006457, GO:0034514
Ce	F52H3.11	0.752069	0.410256	Most-adapted genes
Ce	Y49A3A.2	0.751894	0.499725	Most-adapted genes	GO:0005524, GO:0006811, GO:0005886, GO:0000166, GO:0046961, GO:1902600, GO:0005774, GO:0007042, GO:0046034, GO:0033180
Ce	Y71F9B.4	0.751786	0.512821	Most-adapted genes	GO:0005634, GO:0000398, GO:0071011, GO:0071013, GO:0003723, GO:1990904, GO:0034719, GO:0043186, GO:0005686, GO:0006397, GO:0008380, GO:0005681, GO:0071004, GO:0000387, GO:0005685, GO:0005682, GO:0005687, GO:0005689, GO:0097526
Ce	C02E7.7	0.751616	0.606965	Most-adapted genes
Ce	W06A7.5	0.749956	0.495238	Most-adapted genes
Ce	T08B1.2a	0.749852	0.520115	Most-adapted genes
Ce	M03A1.7	0.749775	0.491484	Most-adapted genes
Ce	B0035.9	0.749724	0.538462	Most-adapted genes	GO:0003677, GO:0005634, GO:0042025, GO:0046982, GO:0005694, GO:0000786, GO:0006334
Ce	F54E12.3	0.749724	0.538462	Most-adapted genes	GO:0003677, GO:0005634, GO:0042025, GO:0046982, GO:0005694, GO:0000786, GO:0006334
Ce	C14B1.1	0.749655	0.477366	Most-adapted genes	GO:0005783, GO:0045454, GO:0016853, GO:0006457, GO:0003756, GO:0003810, GO:0034976, GO:0080058, GO:0005788
Ce	F14H12.1	0.749184	0.537698	Most-adapted genes	GO:0016020, GO:0016021, GO:0042302
Ce	F02E8.1	0.748533	0.518519	Most-adapted genes	GO:0015078, GO:0015986, GO:0000276
Ce	F55G1.11	0.748473	0.516026	Most-adapted genes	GO:0003677, GO:0005634, GO:0042025, GO:0046982, GO:0005694, GO:0000786, GO:0006334
Ce	C14F11.1	0.748152	0.48996	Most-adapted genes	GO:0003824, GO:0016740, GO:0005739, GO:0009058, GO:0030170, GO:0006520, GO:0008483, GO:0004069, GO:0006533
Ce	T05H4.12	0.747947	0.525641	Most-adapted genes	GO:0015078, GO:0015986, GO:0000276, GO:0005753
Ce	C09D4.5	0.747603	0.525963	Most-adapted genes	GO:0003723, GO:0003735, GO:0005840, GO:0006412, GO:0022625, GO:0008340
Ce	K11D9.2b	0.747326	0.499171	Most-adapted genes
Ce	F52H3.7b	0.746756	0.500597	Most-adapted genes
Ce	F58F12.1	0.746615	0.53252	Most-adapted genes	GO:0016020, GO:0006811, GO:0005739, GO:0005743, GO:0015986, GO:0046933, GO:0006754, GO:0045261, GO:0000275
Ce	C50F2.6a	0.746528	0.495597	Most-adapted genes
Ce	F55G1.10	0.746454	0.518229	Most-adapted genes	GO:0003677, GO:0005634, GO:0000790, GO:0046982, GO:0006325, GO:0006281, GO:0006342, GO:0005694, GO:0006355, GO:0000786
Ce	ZK354.5	0.746113	0.510417	Most-adapted genes	GO:0005737, GO:0005856, GO:0042995, GO:0031143
Ce	F08B12.4f	0.746112	0.5	Most-adapted genes
Ce	K07F5.1	0.74608	0.505208	Most-adapted genes
Ce	T10C6.12	0.745576	0.53125	Most-adapted genes	GO:0003677, GO:0005634, GO:0000790, GO:0046982, GO:0006325, GO:0006281, GO:0006342, GO:0005694, GO:0006355, GO:0000786
Ce	C47G2.1	0.745237	0.534902	Most-adapted genes	GO:0005576, GO:0060102, GO:0042302
Ce	K11D9.2c	0.745092	0.504466	Most-adapted genes
Ce	ZK970.4	0.744989	0.461749	Most-adapted genes	GO:0006811, GO:0034220, GO:0016020, GO:1902600, GO:0007042, GO:0033180, GO:0046961, GO:0042625
Ce	F01G4.6a	0.74495	0.514174	Most-adapted genes
Ce	F26E4.6	0.744555	0.556863	Most-adapted genes	GO:0016020, GO:0016021, GO:1902600, GO:0005739, GO:0004129, GO:0006123
Ce	F28C6.7b	0.744464	0.542056	Most-adapted genes
Ce	W08E12.4	0.744347	0.518779	Most-adapted genes
Ce	W08E12.5	0.744347	0.518779	Most-adapted genes
Ce	C09B9.6	0.74428	0.505208	Most-adapted genes	GO:0005737, GO:0005856, GO:0042995, GO:0031143
Ce	W09H1.6a	0.744174	0.540476	Most-adapted genes
Ce	D1037.3	0.744108	0.493177	Most-adapted genes	GO:0005737, GO:0046872, GO:0016491, GO:0055114, GO:0005515, GO:0004322, GO:0042802, GO:0005506, GO:0008198, GO:0008199, GO:0006826, GO:0006879, GO:0006880
Ce	C50B6.4	0.743905	0.549087	Most-adapted genes	GO:0016020, GO:0016021, GO:0042302
Ce	F22B3.2	0.743892	0.537713	Most-adapted genes	GO:0005634, GO:0003677, GO:0046982, GO:0005694, GO:0000786
Ce	F47B10.1	0.743642	0.484709	Most-adapted genes	GO:0005524, GO:0003824, GO:0046872, GO:0000166, GO:0005739, GO:0006099, GO:0016874, GO:0000287, GO:0004775, GO:0006104, GO:0042709
Ce	H06O01.1	0.743324	0.458078	Most-adapted genes	GO:0005783, GO:0045454, GO:0016853, GO:0006457, GO:0018991, GO:0090597, GO:0003756, GO:0045138, GO:0010171, GO:0040002, GO:0003810, GO:0008360, GO:0018149, GO:0034976, GO:0040019, GO:0080058
Ce	C37A2.7	0.743278	0.57716	Most-adapted genes	GO:0003735, GO:0005840, GO:0006414
Ce	F53A9.7	0.743067	0.515504	Most-adapted genes	GO:0097501
Ce	F59B8.2b	0.74301	0.485474	Most-adapted genes
Ce	R13H9.4	0.742838	0.507812	Most-adapted genes	GO:0005737, GO:0005856, GO:0042995, GO:0031143
Ce	F29B9.11	0.742543	0.550562	Most-adapted genes	GO:0016020, GO:0016021
Ce	K01G5.4	0.742306	0.493827	Most-adapted genes	GO:0003924, GO:0005525, GO:0005634, GO:0005737, GO:0000166, GO:0015031, GO:0007049, GO:0009792, GO:0005515, GO:0006606, GO:0051301, GO:0005694, GO:0048477, GO:0000775, GO:0000776, GO:0000777, GO:0006913, GO:0000054
Ce	F08F1.8	0.742064	0.486842	Most-adapted genes	GO:0005737, GO:0005856, GO:0005829, GO:0030054, GO:0007015, GO:0003779, GO:0005938, GO:0003785
Ce	F38E11.1	0.741513	0.448485	Most-adapted genes	GO:0051082, GO:0031072
Ce	H12D21.1	0.741461	0.495238	Most-adapted genes
Ce	H12D21.13	0.741461	0.495238	Most-adapted genes
Ce	ZC412.6	0.741461	0.495238	Most-adapted genes
Ce	ZC412.7	0.741461	0.495238	Most-adapted genes
Ce	K04C2.3b	0.741246	0.506667	Most-adapted genes
Ce	B0035.10	0.741108	0.53528	Most-adapted genes	GO:0005634, GO:0003677, GO:0046982, GO:0005694, GO:0000786
Ce	F54E12.1	0.741108	0.53528	Most-adapted genes	GO:0005634, GO:0003677, GO:0046982, GO:0005694, GO:0000786
Ce	T25F10.6b	0.740986	0.529801	Most-adapted genes
Ce	T06E4.10	0.740696	0.583794	Most-adapted genes
Ce	T10C6.14	0.740207	0.525641	Most-adapted genes	GO:0003677, GO:0005634, GO:0042025, GO:0046982, GO:0005694, GO:0000786, GO:0006334
Ce	Y38H6C.1b	0.740119	0.479167	Most-adapted genes
Ce	F08B12.4c	0.740012	0.515152	Most-adapted genes
Ce	F46F11.5	0.73986	0.480315	Most-adapted genes	GO:0006811, GO:0042626, GO:0016471, GO:1902600, GO:0008553, GO:0012501, GO:0043068, GO:0006754, GO:0015078
Ce	ZK131.2	0.739501	0.523114	Most-adapted genes	GO:0005634, GO:0003677, GO:0046982, GO:0005694, GO:0000786
Ce	ZK131.3	0.739501	0.523114	Most-adapted genes	GO:0005634, GO:0003677, GO:0046982, GO:0005694, GO:0000786
Ce	ZK131.7	0.739501	0.523114	Most-adapted genes	GO:0005634, GO:0003677, GO:0046982, GO:0005694, GO:0000786
Ce	F35A5.3	0.73944	0.541667	Most-adapted genes	GO:0005515, GO:0030968
Ce	B0464.3	0.738333	0.48996	Most-adapted genes
Ce	F57B9.6a	0.737965	0.473118	Most-adapted genes
Ce	W06A7.3e	0.737937	0.486179	Most-adapted genes
Ce	T06E4.9	0.737933	0.554348	Most-adapted genes
Ce	F08G2.3	0.737914	0.530414	Most-adapted genes	GO:0005634, GO:0003677, GO:0046982, GO:0005694, GO:0000786
Ce	R13H9.2	0.737471	0.510417	Most-adapted genes	GO:0005737, GO:0005856, GO:0042995, GO:0031143
Ce	Y73B6BL.9b	0.7373	0.518817	Most-adapted genes
Ce	F08B12.4e	0.736809	0.501684	Most-adapted genes
Ce	F54H12.1c	0.736565	0.469786	Most-adapted genes
Ce	F15B9.1	0.736498	0.429825	Most-adapted genes	GO:0008289
Ce	R09B5.5	0.736313	0.550129	Most-adapted genes	GO:0005515
Ce	T22F3.3c	0.736075	0.519467	Most-adapted genes
Ce	T05G5.10c	0.735781	0.492537	Most-adapted genes
Ce	C32D5.9	0.735735	0.454301	Most-adapted genes	GO:0016020, GO:0005886, GO:0005737, GO:0031410, GO:0005515, GO:0005829, GO:0005739, GO:0005776, GO:0042995, GO:0005764, GO:0030425, GO:0043204, GO:0000045, GO:0008017, GO:0031625, GO:0005634, GO:0043005, GO:0043025, GO:0008340, GO:0040024, GO:0010940, GO:0012501, GO:0000421, GO:0006914, GO:0016236, GO:0000407, GO:0000422, GO:0006995, GO:2000786, GO:0030670, GO:0043202, GO:0005741, GO:0097352, GO:…
Ce	H04M03.2	0.735723	0.482353	Most-adapted genes
Ce	W09H1.6b	0.735472	0.537296	Most-adapted genes
Ce	F23H12.9a	0.735429	0.442922	Most-adapted genes
Ce	K02B2.5	0.735292	0.533898	Most-adapted genes	GO:0005840, GO:0003735, GO:0022627
Ce	F23C8.5b	0.734793	0.488889	Most-adapted genes
Ce	B0403.4	0.734588	0.493575	Most-adapted genes	GO:0045454, GO:0016853, GO:0005783, GO:0030968, GO:0003756, GO:0005788
Ce	C34F6.3	0.734301	0.537559	Most-adapted genes	GO:0016020, GO:0016021, GO:0030198, GO:0005615, GO:0045087, GO:0042302, GO:0005201, GO:0031012
Ce	H14A12.6	0.734256	0.488372	Most-adapted genes
Ce	F54D8.2	0.733956	0.488372	Most-adapted genes	GO:0016020, GO:0016021, GO:0016491, GO:0055114, GO:0005739, GO:0005743, GO:0050790, GO:0030234, GO:1902600, GO:0004129, GO:0006123, GO:0009060, GO:0005751, GO:0006119
Ce	R53.4	0.733822	0.504329	Most-adapted genes	GO:0016020, GO:0006811, GO:0005739, GO:0031966, GO:0006754, GO:0045263
Ce	F41F3.4	0.73379	0.573419	Most-adapted genes	GO:0016020, GO:0016021, GO:0042302
Ce	T04G9.5	0.733221	0.514991	Most-adapted genes	GO:0016020, GO:0016021, GO:0005783, GO:0005789
Ce	C09B8.6c	0.733065	0.489297	Most-adapted genes
Ce	F28C6.7c	0.732541	0.551515	Most-adapted genes
Ce	K01G5.7	0.732215	0.520741	Most-adapted genes	GO:0005525, GO:0005737, GO:0000166, GO:0003924, GO:0000278, GO:0005856, GO:0005874, GO:0007017, GO:0005200, GO:0000226, GO:0005876
Ce	F01F1.12	0.731686	0.515895	Most-adapted genes	GO:0003824, GO:0016829, GO:0005829, GO:0005737, GO:0006096, GO:0030388, GO:0005720, GO:0004332
Ce	F09C12.7	0.731403	0.525641	Most-adapted genes
Ce	T18H9.2	0.731111	0.443411	Most-adapted genes	GO:0016787, GO:0006508, GO:0008233, GO:0004190, GO:0030163
Ce	C53B7.4	0.730993	0.494949	Most-adapted genes	GO:0016020, GO:0006811, GO:0005739, GO:0015078, GO:0097730, GO:0031966, GO:0015986, GO:0000276, GO:0006754, GO:0045263
Ce	T21B10.2c	0.730898	0.500715	Most-adapted genes
Ce	T19H12.15	0.73048	0.512281	Most-adapted genes
Ce	T20G5.2	0.73041	0.483298	Most-adapted genes	GO:0016740, GO:0006099, GO:0005739, GO:0005975, GO:0005759, GO:0004108, GO:0006101, GO:0046912
Ce	C29E4.1	0.729629	0.493464	Most-adapted genes	GO:0005581, GO:0042302
Ce	R10E11.2	0.729605	0.50823	Most-adapted genes	GO:0016020, GO:0016021, GO:0006811, GO:0015078, GO:0033179, GO:0046961, GO:1902600, GO:0012501, GO:0005773, GO:0005774, GO:0007042, GO:0033177
Ce	Y56A3A.21	0.729503	0.516667	Most-adapted genes	GO:0016021, GO:0012505, GO:0005515, GO:0005783
Ce	T10B10.1	0.729205	0.555556	Most-adapted genes	GO:0042302
Ce	F22B3.1	0.729027	0.535256	Most-adapted genes	GO:0003677, GO:0005634, GO:0042025, GO:0046982, GO:0005694, GO:0000786, GO:0006334
Ce	C49F8.14	0.728875	0.410256	Most-adapted genes
Ce	F36A2.7	0.728833	0.496032	Most-adapted genes	GO:0016020, GO:0016021
Ce	C25A8.1	0.72763	0.5	Most-adapted genes
Ce	F28D1.5	0.72725	0.514245	Most-adapted genes	GO:0005576, GO:0003674, GO:0050830
Ce	K03A1.6	0.727166	0.522436	Most-adapted genes	GO:0003677, GO:0005634, GO:0042025, GO:0046982, GO:0005694, GO:0000786, GO:0006334
Ce	Y105E8B.1l	0.726984	0.533074	Most-adapted genes
Ce	F28D1.7a	0.726806	0.511574	Most-adapted genes
Ce	D2023.7	0.726748	0.520277	Most-adapted genes	GO:0042302, GO:0042329, GO:0042335, GO:0060102
Ce	T08G5.10	0.726433	0.494792	Most-adapted genes	GO:0046872
Ce	C14B9.10	0.726268	0.480874	Most-adapted genes	GO:0005743, GO:0005750, GO:0006122, GO:0009060, GO:0034551
Ce	R05H5.3	0.725405	0.5	Most-adapted genes	GO:0045454
Ce	R03D7.6a	0.725386	0.479167	Most-adapted genes
Ce	F15A2.1b	0.724827	0.559814	Most-adapted genes
Ce	ZK1248.2	0.724692	0.523232	Most-adapted genes	GO:0016020, GO:0016021, GO:0042302
Ce	W01B6.7	0.724578	0.568433	Most-adapted genes	GO:0005581, GO:0042302
Ce	R05F9.13	0.724302	0.520833	Most-adapted genes	GO:0005737, GO:0005856, GO:0042995, GO:0031143
Ce	Y5F2A.1	0.724187	0.481203	Most-adapted genes	GO:0005576, GO:0005615
Ce	F52E4.1b	0.72383	0.499044	Most-adapted genes
Ce	W03F8.1	0.723725	0.470085	Most-adapted genes	GO:0009792, GO:0003779, GO:0005861, GO:0006936, GO:0030017, GO:0043050, GO:0030172
Ce	T08A9.9	0.723572	0.471154	Most-adapted genes	GO:0055085, GO:0050829, GO:0050830, GO:0015267
Ce	T05E11.3b	0.723502	0.446057	Most-adapted genes
Ce	T24B8.3c	0.147286	0.483333	Least-adapted genes
Ce	T04H1.13	0.152836	0.466667	Least-adapted genes
Ce	Y54F10AM.15	0.153478	0.233333	Least-adapted genes
Ce	C08B6.18	0.160285	0.424242	Least-adapted genes
Ce	Y69A2AR.24	0.169884	0.461538	Least-adapted genes
Ce	MTCE.4	0.177435	0.181818	Least-adapted genes
Ce	MTCE.3	0.181885	0.201389	Least-adapted genes	GO:0016020, GO:0016021, GO:0055114, GO:0005739, GO:0031966, GO:0070469, GO:0006120, GO:0008137
Ce	Y75B8A.63	0.187052	0.435897	Least-adapted genes
Ce	W02A2.12	0.187473	0.647059	Least-adapted genes
Ce	MTCE.35	0.187964	0.227704	Least-adapted genes	GO:0016020, GO:0016021, GO:0055114, GO:0005739, GO:0005743, GO:0005747, GO:0070469, GO:0006120, GO:0008137, GO:0015990, GO:0003954
Ce	MTCE.25	0.189488	0.223309	Least-adapted genes	GO:0016020, GO:0016021, GO:0055114, GO:0005739, GO:0048039, GO:0005747, GO:0031966, GO:0008137, GO:0042773, GO:0070469, GO:0009060, GO:0006120, GO:0015990, GO:0045271
Ce	MTCE.21	0.194292	0.263063	Least-adapted genes	GO:0016020, GO:0016021, GO:0046872, GO:0009055, GO:0016491, GO:0055114, GO:0005739, GO:0005743, GO:0005575, GO:0031224, GO:0005750, GO:0006122, GO:0070469, GO:0022904
Ce	MTCE.34	0.199686	0.216216	Least-adapted genes	GO:0016020, GO:0016021, GO:0055114, GO:0005739, GO:0005747, GO:0031966, GO:0008137, GO:0070469, GO:0006120
Ce	C13G3.12	0.203327	0.575758	Least-adapted genes
Ce	F54F2.14	0.207397	0.447154	Least-adapted genes
Ce	Y49F6A.12	0.207799	0.366013	Least-adapted genes
Ce	F08B12.11	0.208703	0.333333	Least-adapted genes
Ce	Y37D8A.29	0.211487	0.357143	Least-adapted genes
Ce	C18D4.6d	0.211747	0.427536	Least-adapted genes
Ce	M176.16	0.212384	0.424242	Least-adapted genes
Ce	T28F3.11	0.21576	0.212121	Least-adapted genes
Ce	Y54E5A.8e	0.215826	0.511905	Least-adapted genes
Ce	Y69A2AR.51	0.220376	0.506667	Least-adapted genes
Ce	ZK380.6	0.221763	0.567901	Least-adapted genes
Ce	Y59A8B.24	0.223396	0.547264	Least-adapted genes
Ce	F53G2.12b	0.225752	0.487179	Least-adapted genes
Ce	Y48A5A.3b	0.228123	0.475	Least-adapted genes
Ce	MTCE.16	0.228154	0.198582	Least-adapted genes	GO:0016020, GO:0016021, GO:0055114, GO:0005739, GO:0005743, GO:0005747, GO:0070469, GO:0006120, GO:0008137
Ce	MTCE.23	0.228738	0.281046	Least-adapted genes	GO:0016020, GO:0016021, GO:0005739, GO:0009055, GO:0005743, GO:0055085, GO:1902600, GO:0015002, GO:0004129, GO:0006123, GO:0009060, GO:0022904, GO:0015453, GO:0019646
Ce	C12D12.3	0.230099	0.39539	Least-adapted genes	GO:0016020, GO:0016021
Ce	R13A1.1	0.230661	0.340909	Least-adapted genes
Ce	F01E11.20	0.230738	0.266667	Least-adapted genes
Ce	C33H5.13c	0.231003	0.333333	Least-adapted genes
Ce	C01F6.14	0.232135	0.364444	Least-adapted genes	GO:0016020, GO:0016021
Ce	W08E12.9	0.234396	0.463768	Least-adapted genes
Ce	Y71F9B.2b	0.23483	0.542636	Least-adapted genes
Ce	M04C3.5b	0.235555	0.316667	Least-adapted genes
Ce	MTCE.26	0.23558	0.296508	Least-adapted genes	GO:0016020, GO:0016021, GO:0046872, GO:0055114, GO:0020037, GO:0005739, GO:0005743, GO:0004129, GO:0006123, GO:0070469, GO:0009060, GO:0015990, GO:0005751, GO:0006119, GO:0022904, GO:0045277
Ce	MTCE.31	0.236805	0.25974	Least-adapted genes	GO:0016020, GO:0016021, GO:0046872, GO:0055114, GO:0005507, GO:0005739, GO:0005743, GO:1902600, GO:0004129, GO:0070469, GO:0022900, GO:0006123, GO:0042773
Ce	T16A1.5	0.237307	0.373016	Least-adapted genes
Ce	Y39G8B.13	0.238315	0.393939	Least-adapted genes
Ce	F15A8.1	0.23953	0.38172	Least-adapted genes	GO:0016020, GO:0016021
Ce	Y47H9C.4d	0.240471	0.44	Least-adapted genes
Ce	R102.11b	0.241608	0.588015	Least-adapted genes
Ce	MTCE.11	0.241752	0.25315	Least-adapted genes	GO:0016020, GO:0055114
Ce	T03G6.7	0.24314	0.366667	Least-adapted genes
Ce	Y55D5A.2	0.24337	0.482759	Least-adapted genes
Ce	F58F6.2	0.243774	0.58992	Least-adapted genes	GO:0016020, GO:0016021, GO:0030198, GO:0005615, GO:0042302, GO:0005201, GO:0031012
Ce	Y116A8A.150a	0.245465	0.533333	Least-adapted genes
Ce	C26H9A.4	0.245846	0.305556	Least-adapted genes
Ce	C45B2.8	0.24619	0.472973	Least-adapted genes
Ce	Y40B10A.11	0.246339	0.606426	Least-adapted genes
Ce	Y48G8AR.8	0.247469	0.502415	Least-adapted genes
Ce	T28C12.15	0.250214	0.42	Least-adapted genes
Ce	B0348.10	0.25226	0.515152	Least-adapted genes
Ce	K02A2.5	0.252682	0.40942	Least-adapted genes
Ce	Y82E9BR.10	0.252734	0.37037	Least-adapted genes
Ce	K02E7.12	0.252759	0.339286	Least-adapted genes
Ce	F20B6.10b	0.253558	0.595238	Least-adapted genes
Ce	Y17G9A.3b	0.254219	0.359596	Least-adapted genes
Ce	C50E10.7	0.255114	0.362637	Least-adapted genes	GO:0016020, GO:0016021, GO:0007606
Ce	T24D1.7	0.255603	0.597222	Least-adapted genes
Ce	C27H5.12	0.255953	0.333333	Least-adapted genes
Ce	Y53G8AL.4a	0.256463	0.47619	Least-adapted genes
Ce	C50E10.6	0.256956	0.395264	Least-adapted genes	GO:0016020, GO:0016021, GO:0007606
Ce	T09F5.20a	0.257217	0.34375	Least-adapted genes
Ce	R102.11a	0.257802	0.542328	Least-adapted genes
Ce	Y40A1A.2	0.257986	0.337963	Least-adapted genes
Ce	F58F6.5	0.258202	0.319672	Least-adapted genes	GO:0016020, GO:0016021
Ce	Y43F8C.20	0.259382	0.654639	Least-adapted genes
Ce	MTCE.12	0.259903	0.241206	Least-adapted genes	GO:0016020, GO:0016021, GO:0006811, GO:0005739, GO:0005743, GO:0015078, GO:0015986, GO:0005753, GO:0006754, GO:0045259, GO:0045263
Ce	F58F12.12	0.259912	0.251852	Least-adapted genes	GO:0016020, GO:0016021
Ce	Y116A8A.150b	0.260228	0.506173	Least-adapted genes
Ce	F20B6.9	0.260361	0.442308	Least-adapted genes
Ce	F26F12.6a	0.260466	0.345238	Least-adapted genes
Ce	B0205.2b	0.260543	0.30303	Least-adapted genes
Ce	ZK1321.1	0.260877	0.419223	Least-adapted genes	GO:0016020, GO:0016021
Ce	Y39H10B.2d	0.261429	0.333333	Least-adapted genes
Ce	F18E9.8a	0.261518	0.365079	Least-adapted genes
Ce	F20G2.6a	0.261822	0.440546	Least-adapted genes
Ce	F15B9.11	0.262248	0.368794	Least-adapted genes
Ce	C50E10.11	0.262259	0.390772	Least-adapted genes	GO:0016020, GO:0016021, GO:0007606
Ce	Y51H7BR.4b	0.263404	0.347518	Least-adapted genes
Ce	T16G1.18	0.263917	0.405556	Least-adapted genes
Ce	K10F12.4b	0.264435	0.454301	Least-adapted genes
Ce	F35B12.1b	0.264559	0.325843	Least-adapted genes
Ce	ZC262.12	0.264584	0.287796	Least-adapted genes	GO:0016020, GO:0016021
Ce	F55A12.2d	0.264946	0.416667	Least-adapted genes
Ce	ZK381.62	0.265401	0.284946	Least-adapted genes	GO:0016020, GO:0016021
Ce	ZC53.22	0.266005	0.351515	Least-adapted genes	GO:0016020, GO:0016021
Ce	K03D10.3c	0.266332	0.53252	Least-adapted genes
Ce	T07H3.8	0.266552	0.45	Least-adapted genes
Ce	F15D3.5	0.267304	0.545455	Least-adapted genes
Ce	Y66D12A.30	0.267365	0.455939	Least-adapted genes
Ce	T25B2.3	0.267439	0.438202	Least-adapted genes
Ce	C18A3.10	0.268202	0.342593	Least-adapted genes	GO:0016020, GO:0016021
Ce	D1046.16	0.268417	0.434174	Least-adapted genes	GO:0016020, GO:0016021
Ce	M04C3.5d	0.268701	0.315018	Least-adapted genes
Ce	C31B8.1	0.268734	0.343478	Least-adapted genes	GO:0016020, GO:0016021
Ce	F02C12.3	0.26874	0.470085	Least-adapted genes
Ce	F11D11.4	0.268988	0.419355	Least-adapted genes
Ce	K12C11.3b	0.269296	0.41784	Least-adapted genes
Ce	T23B7.3b	0.269585	0.410714	Least-adapted genes
Ce	Y94A7B.1	0.269708	0.357798	Least-adapted genes	GO:0016020, GO:0016021
Ce	F36H5.17	0.269795	0.459596	Least-adapted genes	GO:0005515
Ce	Y54G11A.19	0.269828	0.325926	Least-adapted genes	GO:0016020, GO:0016021
Ce	Y51H7BR.4a	0.27031	0.371648	Least-adapted genes
Ce	T26H8.4	0.27044	0.316049	Least-adapted genes	GO:0016020, GO:0016021, GO:0007186, GO:0008528
Ce	ZK6.10c	0.270739	0.482759	Least-adapted genes
Ce	Y39F10C.1a	0.270978	0.410959	Least-adapted genes
Ce	C54F6.19	0.271052	0.304762	Least-adapted genes
Ce	F58H1.4	0.271104	0.384824	Least-adapted genes	GO:0005615, GO:0007166, GO:0051427
Ce	C02F4.5	0.271119	0.32906	Least-adapted genes
Ce	Y22F5A.2	0.271166	0.314121	Least-adapted genes	GO:0016020, GO:0016021
Ce	B0205.2a	0.271176	0.311758	Least-adapted genes
Ce	Y51B9A.14	0.271349	0.402439	Least-adapted genes
Ce	Y46G5A.47	0.27143	0.366667	Least-adapted genes
Ce	Y44A6B.2a	0.271554	0.362051	Least-adapted genes
Ce	K09B3.1a	0.27212	0.517921	Least-adapted genes
Ce	Y105E8A.32	0.272412	0.515152	Least-adapted genes
Ce	Y9C9A.9	0.27285	0.316618	Least-adapted genes	GO:0016020, GO:0016021, GO:0005887, GO:0007186, GO:0038022, GO:0042048, GO:0050911
Ce	Y43F8C.19	0.272859	0.360043	Least-adapted genes	GO:0016020, GO:0016021, GO:0004888, GO:0007606
Ce	F08C6.18	0.273157	0.512821	Least-adapted genes
Ce	F10E9.10	0.27317	0.354701	Least-adapted genes	GO:0016020, GO:0016021
Ce	C53D6.11	0.273265	0.351145	Least-adapted genes	GO:0016020, GO:0016021
Ce	C25F9.13	0.273807	0.364444	Least-adapted genes	GO:0016020, GO:0016021, GO:0007186, GO:0008528
Ce	K08D8.7a	0.274365	0.416667	Least-adapted genes
Ce	C01A2.1c	0.274366	0.37037	Least-adapted genes
Ce	C32E8.13	0.274968	0.460784	Least-adapted genes
Ce	C36C5.8	0.275228	0.361765	Least-adapted genes	GO:0016020, GO:0016021
Ce	Y39G8C.3b	0.27535	0.380952	Least-adapted genes
Ce	C34D10.5	0.275454	0.458333	Least-adapted genes
Ce	R01H2.8	0.275627	0.346667	Least-adapted genes	GO:0016020, GO:0016021
Ce	T02H6.1c	0.275846	0.444444	Least-adapted genes
Ce	T07H3.7	0.275902	0.467262	Least-adapted genes
Ce	C07A12.18b	0.276052	0.40991	Least-adapted genes
Ce	ZK666.15	0.276325	0.33584	Least-adapted genes	GO:0016020, GO:0016021
Ce	Y119D3B.3	0.276482	0.314421	Least-adapted genes	GO:0016020, GO:0016021
Ce	F40H3.6	0.27652	0.377193	Least-adapted genes
Ce	W05B10.5b	0.276551	0.346626	Least-adapted genes
Ce	F13B9.2	0.276623	0.359195	Least-adapted genes
Ce	B0238.8	0.277229	0.34009	Least-adapted genes	GO:0016020, GO:0016021
Ce	Y54E5A.8d	0.277886	0.488215	Least-adapted genes
Ce	Y22F5A.11	0.277967	0.380952	Least-adapted genes
Ce	E04D5.4b	0.278183	0.448413	Least-adapted genes
Ce	W05B10.5a	0.278205	0.347561	Least-adapted genes
Ce	T10B9.14	0.278419	0.349593	Least-adapted genes
Ce	Y44A6B.2b	0.278649	0.364848	Least-adapted genes
Ce	ZC412.1b	0.278661	0.481481	Least-adapted genes
Ce	C08F11.9	0.278833	0.300104	Least-adapted genes	GO:0016020, GO:0016021
Ce	C33A12.13	0.278873	0.320551	Least-adapted genes	GO:0016020, GO:0016021
Ce	C30F2.1	0.278912	0.512987	Least-adapted genes	GO:0016020, GO:0016021, GO:0005581
Ce	Y75B8A.37	0.278919	0.389408	Least-adapted genes	GO:0016020, GO:0033692
Ce	F42G2.7b	0.279103	0.526042	Least-adapted genes
Ce	T10B5.3b	0.279255	0.454545	Least-adapted genes
Ce	C16A11.1b	0.279307	0.411321	Least-adapted genes
Ce	R07B5.3d	0.279524	0.356322	Least-adapted genes
Ce	R05C11.4b	0.279682	0.475556	Least-adapted genes
Ce	C04C11.25	0.280007	0.27619	Least-adapted genes	GO:0016020, GO:0016021
Ce	Y92H12BL.6	0.280008	0.396825	Least-adapted genes
Ce	C44C3.8	0.280029	0.335656	Least-adapted genes	GO:0016020, GO:0016021
Ce	C09G12.11	0.28015	0.343983	Least-adapted genes	GO:0016020, GO:0016021
Ce	R07B5.3c	0.280261	0.347953	Least-adapted genes
Ce	ZK262.1	0.28055	0.4	Least-adapted genes	GO:0016020, GO:0016021
Ce	ZK228.13	0.28058	0.416667	Least-adapted genes
Ce	F14F8.3	0.280596	0.325301	Least-adapted genes	GO:0016020, GO:0016021
Ce	K09C4.2	0.280686	0.424837	Least-adapted genes	GO:0016020, GO:0016021, GO:0022857, GO:0055085
Ce	F37B4.4	0.280689	0.381818	Least-adapted genes	GO:0016020, GO:0016021
Ce	T06C12.12	0.280759	0.418879	Least-adapted genes	GO:0016020, GO:0016021, GO:0006679, GO:0008120
Ce	T23B7.3a	0.280835	0.420054	Least-adapted genes
Ce	F40G9.19	0.280936	0.398374	Least-adapted genes	GO:0016020, GO:0016021
Ce	M01D7.9	0.281019	0.429719	Least-adapted genes	GO:0005634, GO:0000381, GO:0003727
Ce	C08H9.4a	0.281058	0.345679	Least-adapted genes
Ce	R13D7.11	0.281199	0.459916	Least-adapted genes
Ce	W04A4.6	0.281234	0.442652	Least-adapted genes
Ce	C36A4.10	0.28142	0.342105	Least-adapted genes
Ce	T06C10.2	0.281465	0.307071	Least-adapted genes	GO:0016020, GO:0016021
Ce	F36A4.5b	0.281533	0.40625	Least-adapted genes
Ce	K07D4.9	0.281765	0.537217	Least-adapted genes
Ce	Y54G11A.14b	0.281806	0.528986	Least-adapted genes
Ce	C02A12.2	0.281885	0.35578	Least-adapted genes	GO:0016020, GO:0016021
Ce	Y74C10AR.3c	0.281886	0.406709	Least-adapted genes
Ce	F19B6.10	0.282686	0.465517	Least-adapted genes
Ce	F42A9.9	0.282841	0.38685	Least-adapted genes	GO:0016020, GO:0016021
Ce	F17C11.13b	0.282931	0.368957	Least-adapted genes
Ce	Y53G8AL.4b	0.282956	0.464539	Least-adapted genes
Ce	F37B4.6	0.28306	0.391865	Least-adapted genes	GO:0016020, GO:0016021
Ce	C40H1.7b	0.283062	0.37415	Least-adapted genes
Ce	T24A6.9c	0.283441	0.404155	Least-adapted genes
Ce	T22H6.1	0.283644	0.412913	Least-adapted genes	GO:0005576, GO:0007165, GO:0005125, GO:0040017, GO:0070482
Ce	B0238.5a	0.283656	0.338675	Least-adapted genes
Ce	W02D3.13b	0.283753	0.363636	Least-adapted genes
Ce	F53B2.4	0.283862	0.344581	Least-adapted genes
Ce	Y50E8A.22	0.283917	0.361582	Least-adapted genes
Ce	Y49C4A.2	0.28393	0.333333	Least-adapted genes	GO:0016020, GO:0016021
Ce	K09H11.11	0.284001	0.462222	Least-adapted genes
Ce	W07B3.2e	0.284019	0.386667	Least-adapted genes
Ce	Y92H12BL.7	0.284042	0.441288	Least-adapted genes	GO:0007165
Ce	C45H4.11d	0.284133	0.363636	Least-adapted genes
Ce	ZC262.11	0.284181	0.277778	Least-adapted genes	GO:0016020, GO:0016021
Ce	T15B7.11a	0.284286	0.330508	Least-adapted genes
Ce	W05B5.1f	0.28445	0.518152	Least-adapted genes
Ce	ZK783.7	0.284555	0.37751	Least-adapted genes
Ce	C49F5.13	0.284843	0.346154	Least-adapted genes
Ce	Y48C3A.8b	0.284917	0.555556	Least-adapted genes
Ce	K09C4.1b	0.285053	0.371345	Least-adapted genes
Ce	C41G6.2	0.285135	0.357349	Least-adapted genes	GO:0016020, GO:0016021, GO:0007186, GO:0008528
Ce	ZC190.5b	0.285183	0.350265	Least-adapted genes
Ce	C09E9.1d	0.285306	0.489899	Least-adapted genes
Ce	C45H4.7	0.285573	0.350694	Least-adapted genes	GO:0016020, GO:0016021
Ce	F43E2.11	0.285615	0.382609	Least-adapted genes
Ce	W09G3.6b	0.285743	0.532338	Least-adapted genes
Ce	T25E12.11	0.285752	0.316057	Least-adapted genes	GO:0016020, GO:0016021
Ce	T10E9.5	0.286061	0.316736	Least-adapted genes	GO:0016020, GO:0016021
Ce	C24D10.49	0.286221	0.403226	Least-adapted genes
Ce	Y105C5B.4	0.286231	0.345418	Least-adapted genes	GO:0016020, GO:0016021
Ce	Y38C1BA.4	0.286286	0.441667	Least-adapted genes
Ce	T22C8.7c	0.286383	0.394667	Least-adapted genes
Ce	H12D21.9b	0.28641	0.391257	Least-adapted genes
Ce	T03F7.2	0.286436	0.357746	Least-adapted genes	GO:0016020, GO:0016021
Ce	W10G11.10	0.286448	0.391691	Least-adapted genes	GO:0016020, GO:0016021
Ce	W05E7.2	0.286649	0.357214	Least-adapted genes	GO:0016020, GO:0016021
Ce	ZC455.6b	0.286679	0.304094	Least-adapted genes
Ce	M04C3.5c	0.286781	0.356698	Least-adapted genes
Ce	Y50D4A.6b	0.286834	0.473684	Least-adapted genes
Ce	T05A8.11	0.28684	0.37037	Least-adapted genes
Ce	ZC190.5a	0.286891	0.350427	Least-adapted genes
Ce	T19D2.13a	0.286926	0.533333	Least-adapted genes
Ce	C05E4.14d	0.286952	0.441489	Least-adapted genes
Ce	F53F4.16	0.286962	0.441026	Least-adapted genes
Ce	C29E4.17	0.287034	0.368687	Least-adapted genes	GO:0016020, GO:0016021
Ce	C30G4.4s	0.287076	0.374269	Least-adapted genes
Ce	W10D9.1	0.287131	0.317949	Least-adapted genes	GO:0016020, GO:0016021
Ce	C50E10.10	0.287359	0.359848	Least-adapted genes	GO:0016020, GO:0016021, GO:0007606
Ce	C32H11.2	0.28747	0.31031	Least-adapted genes	GO:0016020, GO:0016021
Ce	Y39B6A.48b	0.28751	0.461667	Least-adapted genes
Ce	C44H4.8	0.287619	0.488889	Least-adapted genes	GO:0016020, GO:0016021
Ce	Y39F10C.1c	0.287771	0.4	Least-adapted genes
Ce	K09C6.4a	0.287868	0.379819	Least-adapted genes
Ce	C14C10.10	0.288205	0.357143	Least-adapted genes
Ce	K09C6.4b	0.288241	0.383721	Least-adapted genes
Ce	R05C11.4a	0.288252	0.443886	Least-adapted genes
Ce	F36D3.6	0.288405	0.371601	Least-adapted genes	GO:0016020, GO:0016021
Ce	K09B3.1b	0.28853	0.522727	Least-adapted genes
Ce	C01B10.7b	0.288561	0.355556	Least-adapted genes
Ce	R10D12.17	0.288597	0.333333	Least-adapted genes	GO:0016020, GO:0016021, GO:0007186, GO:0008528
Ce	K03D10.3d	0.288727	0.533333	Least-adapted genes
Ce	F44G4.3	0.288747	0.409091	Least-adapted genes	GO:0016020, GO:0016021
Ce	F23C8.13b	0.288759	0.516304	Least-adapted genes
Ce	F07F6.9	0.288767	0.351682	Least-adapted genes	GO:0016020, GO:0016021
Ce	Y60A3A.3	0.288796	0.411647	Least-adapted genes	GO:0016020, GO:0016021
Ce	Y105C5B.6d	0.288819	0.424242	Least-adapted genes
Ce	C05E4.14g	0.288872	0.436426	Least-adapted genes
Ce	R07B5.3b	0.28893	0.34596	Least-adapted genes
Ce	T09F5.16	0.289016	0.318376	Least-adapted genes	GO:0016020, GO:0016021
Ce	F35B12.1a	0.289087	0.326176	Least-adapted genes
Ce	ZK180.8b	0.289202	0.4375	Least-adapted genes
Ce	T24A6.9b	0.289271	0.400531	Least-adapted genes
Ce	T14G12.12	0.289298	0.442857	Least-adapted genes
Ce	H12D21.9a	0.28932	0.386025	Least-adapted genes
Ce	C38C5.1a	0.289356	0.507246	Least-adapted genes
Ce	F10G2.6a	0.2895	0.297101	Least-adapted genes
Ce	R06B10.7	0.28973	0.32381	Least-adapted genes
Ce	F33D11.16b	0.289731	0.433333	Least-adapted genes
Ce	C26G2.1c	0.289804	0.475694	Least-adapted genes
Ce	C29F3.6	0.289808	0.355346	Least-adapted genes	GO:0016020, GO:0016021
Ce	C53A5.8	0.289823	0.321505	Least-adapted genes	GO:0016020, GO:0016021, GO:0004888, GO:0007606, GO:0005929
Ce	R09E12.8	0.290045	0.388316	Least-adapted genes	GO:0016020, GO:0016021
Ce	C33A12.10	0.290205	0.302941	Least-adapted genes	GO:0016020, GO:0016021
Ce	F46C3.7	0.290254	0.467354	Least-adapted genes
Ce	C25E10.13	0.290435	0.385965	Least-adapted genes
Ce	ZK892.1e	0.290441	0.456522	Least-adapted genes
Ce	C55C3.73	0.290521	0.488889	Least-adapted genes
Ce	T21G5.2	0.290603	0.272727	Least-adapted genes	GO:0016020, GO:0016021
Ce	C25F9.9	0.290664	0.360958	Least-adapted genes
Ce	C05E4.4b	0.29078	0.471831	Least-adapted genes
Ce	Y48B6A.9	0.290814	0.386157	Least-adapted genes
Ce	Y47D7A.16a	0.290909	0.401869	Least-adapted genes
Ce	F47G4.5	0.290976	0.529063	Least-adapted genes	GO:0005515, GO:0007019, GO:0008568, GO:0051013, GO:0008352
Ce	K08D8.10	0.291011	0.379167	Least-adapted genes	GO:0016020, GO:0016021
Ce	F32H5.6a	0.291024	0.374326	Least-adapted genes
Ce	ZC15.5	0.291067	0.381197	Least-adapted genes	GO:0016020, GO:0016021
Ce	ZK84.4	0.291188	0.30137	Least-adapted genes	GO:0016020, GO:0016021
Ce	Y46H3C.7	0.291243	0.468165	Least-adapted genes
Ce	T15B7.11b	0.291355	0.328767	Least-adapted genes
Ce	T05E12.7c	0.291611	0.351032	Least-adapted genes
Ce	K04F1.16	0.29168	0.366267	Least-adapted genes	GO:0016020, GO:0016021
Ce	F35B12.10b	0.291819	0.420875	Least-adapted genes
Ce	H04M03.9	0.292132	0.316402	Least-adapted genes	GO:0016020, GO:0016021
Ce	Y43F4A.1b	0.292151	0.397059	Least-adapted genes
Ce	H23L24.4	0.292169	0.369748	Least-adapted genes	GO:0016020, GO:0016021, GO:0004930, GO:0007186
Ce	ZC239.9	0.292198	0.390593	Least-adapted genes	GO:0016020, GO:0016021
Ce	F07C3.16	0.292215	0.332362	Least-adapted genes	GO:0016020, GO:0016021
Ce	F48D6.2a	0.292216	0.382236	Least-adapted genes
Ce	C16C4.18	0.29224	0.494444	Least-adapted genes
Ce	F10A3.13	0.292446	0.375808	Least-adapted genes	GO:0016020, GO:0016021, GO:0005887, GO:0007186, GO:0038022, GO:0042048, GO:0050911
Ce	F55C9.11	0.29265	0.367816	Least-adapted genes	GO:0005515
Ce	W04G5.3	0.292774	0.310502	Least-adapted genes
Ce	F37C4.8b	0.292786	0.375	Least-adapted genes
Ce	T09F3.7	0.2929	0.509804	Least-adapted genes
Ce	F48D6.2b	0.292912	0.380671	Least-adapted genes
Ce	K03D7.11	0.292957	0.351449	Least-adapted genes	GO:0016020, GO:0016021, GO:0007186, GO:0008528
Ce	C50E10.5	0.292989	0.373849	Least-adapted genes	GO:0016020, GO:0016021, GO:0007606
Ce	F09C6.16	0.293026	0.379242	Least-adapted genes	GO:0016020, GO:0016021, GO:0007186, GO:0008528
Ce	H14A12.5	0.293058	0.378446	Least-adapted genes
Ce	F54B3.4	0.293287	0.397727	Least-adapted genes
Ce	ZC513.9	0.293367	0.340058	Least-adapted genes	GO:0016020, GO:0016021, GO:0005887, GO:0007186, GO:0038022, GO:0042048, GO:0050911
Ce	K03D3.11	0.29341	0.354701	Least-adapted genes	GO:0016020, GO:0016021
Ce	ZC196.8	0.293418	0.324755	Least-adapted genes	GO:0016020, GO:0016021
Ce	F31B9.2	0.293419	0.405714	Least-adapted genes
Ce	Y73B6BL.39	0.293469	0.328328	Least-adapted genes	GO:0016020, GO:0016021
Ce	R02E4.2	0.29376	0.426554	Least-adapted genes	GO:0016020, GO:0016021
Ce	F52F10.5b	0.293812	0.346801	Least-adapted genes
Ce	K09C4.4	0.293887	0.391111	Least-adapted genes	GO:0016020, GO:0016021, GO:0022857, GO:0055085
Ce	H12I19.1	0.293957	0.289634	Least-adapted genes	GO:0016020, GO:0016021
Ce	Y7A5A.10	0.294	0.492593	Least-adapted genes
Ce	C31B8.16	0.294061	0.365915	Least-adapted genes	GO:0016020, GO:0016021
Ce	C14C11.5	0.294113	0.377709	Least-adapted genes	GO:0016020, GO:0016021
Ce	F29G9.1	0.294162	0.463918	Least-adapted genes
Ce	F09F3.1b	0.29421	0.366972	Least-adapted genes
Ce	F55A4.13	0.294239	0.633333	Least-adapted genes
Ce	ZK697.7b	0.294264	0.359477	Least-adapted genes
Ce	Y39A3B.8	0.294284	0.39726	Least-adapted genes
Ce	F31F4.4	0.294334	0.39548	Least-adapted genes	GO:0016020, GO:0016021
Ce	C27D6.8	0.294349	0.307018	Least-adapted genes	GO:0016020, GO:0016021, GO:0004888, GO:0005886, GO:0007606, GO:0004930, GO:0007165, GO:0007186, GO:0042995, GO:0030425, GO:0043204
Ce	ZK1290.7	0.29448	0.317829	Least-adapted genes	GO:0016020, GO:0016021
Ce	K09D9.7	0.294654	0.347222	Least-adapted genes	GO:0016020, GO:0016021
Ce	C41H7.5a	0.294693	0.50303	Least-adapted genes
Ce	Y38A10A.1	0.29481	0.378431	Least-adapted genes	GO:0016020, GO:0016021
Ce	K04C2.7	0.294843	0.363067	Least-adapted genes	GO:0016020, GO:0016021
Ce	Y49F6C.2	0.29485	0.342282	Least-adapted genes
Ce	K08H2.8	0.294852	0.430522	Least-adapted genes	GO:0005634, GO:0046872, GO:0003700, GO:0006355, GO:0008270, GO:0043565, GO:0006357, GO:0003677, GO:0042025
Ce	F20G2.6b	0.294893	0.429224	Least-adapted genes
Ce	T25E12.13	0.294906	0.329243	Least-adapted genes	GO:0016020, GO:0016021
Ce	H12I19.5	0.294915	0.34352	Least-adapted genes	GO:0016020, GO:0016021, GO:0016747, GO:0033692
Ce	T08G3.10	0.294931	0.330645	Least-adapted genes	GO:0016020, GO:0016021, GO:0007186, GO:0008528
Ce	T10C6.15c	0.294944	0.260163	Least-adapted genes
Ce	C42D4.9	0.294985	0.344729	Least-adapted genes	GO:0016020, GO:0016021, GO:0005887, GO:0007186, GO:0038022, GO:0042048, GO:0050911
Ce	T26H5.3	0.295039	0.394683	Least-adapted genes	GO:0016020, GO:0016021
Ce	F43G9.2b	0.295206	0.386946	Least-adapted genes
Ce	F53H2.2	0.295258	0.490196	Least-adapted genes	GO:0016020, GO:0016021
Ce	F32H5.5	0.29528	0.33216	Least-adapted genes	GO:0016020, GO:0016021, GO:0004888, GO:0007606
Ce	F37D6.6	0.295289	0.458333	Least-adapted genes	GO:0005634, GO:0005737, GO:0003700, GO:0006355, GO:0003677, GO:0005667, GO:0007179, GO:0005515
Ce	F14D7.9	0.295433	0.335938	Least-adapted genes	GO:0016020, GO:0016021
Ce	ZC239.17	0.295479	0.330827	Least-adapted genes	GO:0016020, GO:0016021, GO:0051260
Ce	Y48C3A.8a	0.295654	0.546784	Least-adapted genes
Ce	T12A2.13	0.295702	0.345085	Least-adapted genes	GO:0016020, GO:0016021, GO:0004888, GO:0007606
Ce	F08A10.2	0.295746	0.288889	Least-adapted genes	GO:0016020, GO:0016021
Ce	F53G2.12c	0.295799	0.533333	Least-adapted genes
Ce	W07E6.5a	0.295896	0.387255	Least-adapted genes
Ce	T04B2.4	0.296179	0.349758	Least-adapted genes	GO:0016020, GO:0016021
Ce	Y27F2A.11	0.296417	0.368902	Least-adapted genes	GO:0016020, GO:0016021
Ce	R05D8.2b	0.296425	0.374008	Least-adapted genes
Ce	C37F5.1b	0.296454	0.519071	Least-adapted genes
Ce	F17A2.8	0.296472	0.353249	Least-adapted genes	GO:0016020, GO:0016021
Ce	F49D11.11	0.296474	0.394737	Least-adapted genes	GO:0016020, GO:0016021
Ce	F18A12.2	0.296481	0.443763	Least-adapted genes	GO:0016020, GO:0016021
Ce	C27D6.10	0.296571	0.320663	Least-adapted genes	GO:0016020, GO:0016021, GO:0004888, GO:0007606
Ce	R05D8.2a	0.296617	0.374251	Least-adapted genes
Ce	C03G6.11	0.29663	0.348083	Least-adapted genes	GO:0016020, GO:0016021
Ce	Y40D12A.3	0.296632	0.340888	Least-adapted genes	GO:0016020, GO:0016021
Ce	F22E5.4	0.296692	0.390593	Least-adapted genes	GO:0016020, GO:0016021
Ce	T05E12.4	0.296727	0.368015	Least-adapted genes	GO:0016020, GO:0016021, GO:0007186, GO:0008528
Ce	F37B4.9	0.296823	0.362278	Least-adapted genes	GO:0016020, GO:0016021, GO:0007606
Ce	C10G11.2	0.296883	0.324536	Least-adapted genes	GO:0016020, GO:0016021
Ce	Y7A9C.7	0.296982	0.338675	Least-adapted genes	GO:0016020, GO:0016021
Ce	T12A2.12	0.29705	0.352261	Least-adapted genes	GO:0016020, GO:0016021, GO:0004888, GO:0007606
Ce	Y51A2B.2	0.297067	0.342235	Least-adapted genes	GO:0016020, GO:0016021
Ce	F23F1.7	0.297202	0.381982	Least-adapted genes
Ce	F23C8.13c	0.29725	0.509186	Least-adapted genes
Ce	ZK262.11	0.297255	0.413963	Least-adapted genes	GO:0016020, GO:0016021
Ce	Y94H6A.5b	0.297324	0.474926	Least-adapted genes
Ce	Y54G2A.5a	0.297359	0.574297	Least-adapted genes
Ce	Y51A2A.1	0.297372	0.466374	Least-adapted genes	GO:0030246
Ce	Y52E8A.5	0.297379	0.287546	Least-adapted genes	GO:0016020, GO:0016021, GO:0007186, GO:0008528
Ce	Y38E10A.29	0.297587	0.513158	Least-adapted genes
Ce	K03B8.8	0.297594	0.402357	Least-adapted genes
Ce	T09B9.5	0.297604	0.398352	Least-adapted genes	GO:0016020, GO:0016021
Ce	F08H9.12	0.297759	0.293981	Least-adapted genes	GO:0016020, GO:0016021
Ce	F17A2.7	0.297809	0.342797	Least-adapted genes	GO:0016020, GO:0016021
Ce	W02C12.2a	0.297823	0.455446	Least-adapted genes
Ce	ZK177.12	0.297954	0.423423	Least-adapted genes
Ce	C16A11.1a	0.29806	0.369963	Least-adapted genes
Ce	Y39C12A.3c	0.298077	0.329861	Least-adapted genes
Ce	Y73B3A.5	0.298144	0.540136	Least-adapted genes
Ce	R05D8.2d	0.298207	0.374194	Least-adapted genes
Ce	B0198.2b	0.298293	0.440514	Least-adapted genes
Ce	T21B4.12	0.298296	0.395137	Least-adapted genes	GO:0016020, GO:0016021
Ce	F07G11.5b	0.298312	0.372358	Least-adapted genes
Ce	F20E11.15	0.298369	0.35034	Least-adapted genes	GO:0016020, GO:0016021
Ce	R05D8.2c	0.298429	0.374459	Least-adapted genes
Ce	C02C6.14	0.298515	0.555556	Least-adapted genes
Ce	C35D6.10	0.298576	0.324474	Least-adapted genes	GO:0016020, GO:0016021
Ce	C25E10.3c	0.298576	0.355556	Least-adapted genes
Ce	Y54F10BM.21	0.298578	0.277778	Least-adapted genes
Ce	C05E4.14j	0.298593	0.416136	Least-adapted genes
Ce	Y43F8B.7	0.29872	0.403226	Least-adapted genes
Ce	F18E3.4b	0.298841	0.344737	Least-adapted genes
Ce	R05D8.5	0.298929	0.333333	Least-adapted genes	GO:0016020, GO:0016021
Ce	Y54G2A.52	0.298958	0.370748	Least-adapted genes	GO:0016020, GO:0016021
Ce	K10C2.6	0.298973	0.292398	Least-adapted genes
Ce	C09G9.5c	0.299004	0.342949	Least-adapted genes
Ce	T10B10.9	0.29904	0.485981	Least-adapted genes
Ce	F14F8.13	0.299041	0.300912	Least-adapted genes	GO:0016020, GO:0016021
Ce	F16G10.8	0.29905	0.433566	Least-adapted genes
Ce	C18D11.6	0.299073	0.5	Least-adapted genes	GO:0045087
Ce	Y48G1C.10c	0.299101	0.513605	Least-adapted genes
Ce	R04B5.8	0.299141	0.353057	Least-adapted genes	GO:0016020, GO:0016021
Ce	C43D7.6	0.299156	0.412979	Least-adapted genes	GO:0016020, GO:0016021
Ce	F48C1.3	0.299199	0.269608	Least-adapted genes	GO:0016020, GO:0016021
Ce	B0041.11	0.299248	0.460993	Least-adapted genes
Ce	Y105C5B.6b	0.299251	0.422118	Least-adapted genes
Ce	Y113G7A.1	0.299297	0.415133	Least-adapted genes	GO:0016020, GO:0016021
Ce	C06A8.7	0.299308	0.325325	Least-adapted genes	GO:0016020, GO:0016021
Ce	Y26D4A.17a	0.299327	0.333333	Least-adapted genes
Ce	T28C6.11	0.299418	0.486957	Least-adapted genes
Ce	C25F9.1a	0.299441	0.409283	Least-adapted genes
Ce	C24B9.11	0.299474	0.38162	Least-adapted genes	GO:0016020, GO:0016021, GO:0004888, GO:0007606
Ce	C33A12.19b	0.299476	0.45679	Least-adapted genes
Ce	Y54F10BM.23	0.299592	0.393939	Least-adapted genes
Ce	C18B10.7	0.29964	0.356657	Least-adapted genes	GO:0016020, GO:0016021, GO:0005887, GO:0007186, GO:0038022, GO:0042048, GO:0050911
Ce	Y102A5C.33	0.299665	0.319062	Least-adapted genes	GO:0016020, GO:0016021
Ce	F16H11.1	0.299687	0.404382	Least-adapted genes	GO:0016020, GO:0016021, GO:0005887, GO:0055085, GO:0015293, GO:0008643, GO:0071702
Ce	Y32B12B.6	0.299733	0.394939	Least-adapted genes	GO:0016020, GO:0016021, GO:0005634, GO:0003700, GO:0006355, GO:0008270, GO:0043565, GO:0042025
Ce	R52.5	0.299744	0.407609	Least-adapted genes
Ce	C16C8.26	0.299794	0.425926	Least-adapted genes
Ce	F58D2.3	0.299813	0.37037	Least-adapted genes	GO:0031462
Ce	B0507.11	0.299875	0.387646	Least-adapted genes	GO:0016020, GO:0016021
Ce	T01G5.6	0.299956	0.391026	Least-adapted genes	GO:0016020, GO:0016021
Ce	Y95D11A.5	0.3	0.430746	Least-adapted genes	GO:0016020, GO:0016021
Ce	B0244.7	0.300044	0.354338	Least-adapted genes	GO:0016020, GO:0016021, GO:0005886, GO:0004930, GO:0007165, GO:0007186
Ce	F18E3.2	0.300062	0.371171	Least-adapted genes	GO:0016020, GO:0016021, GO:0007186, GO:0008528
Ce	T06E6.4	0.300085	0.427326	Least-adapted genes	GO:0016020, GO:0016021
Ce	Y79H2A.12	0.300095	0.378788	Least-adapted genes	GO:0016020, GO:0016021
Ce	F46G11.4	0.300196	0.436275	Least-adapted genes
Ce	C02A12.10	0.30021	0.377104	Least-adapted genes	GO:0016020, GO:0016021
Ce	T23E7.2d	0.300224	0.403361	Least-adapted genes
Ce	Y61A9LA.12	0.300228	0.412371	Least-adapted genes
Ce	F57B1.9c	0.30024	0.352734	Least-adapted genes
Ce	K09H11.15	0.300258	0.423868	Least-adapted genes
Ce	W06G6.17	0.300273	0.42735	Least-adapted genes
Ce	K09B3.1c	0.300286	0.546448	Least-adapted genes
Ce	Y23H5A.2b	0.300411	0.570328	Least-adapted genes
Ce	C09G9.5b	0.300485	0.322344	Least-adapted genes
Ce	T24A6.6b	0.300554	0.398742	Least-adapted genes
Ce	F57G9.2	0.300671	0.372439	Least-adapted genes	GO:0016020, GO:0016021, GO:0007606
Ce	F16H6.2	0.300687	0.49162	Least-adapted genes	GO:0030246
Ce	F20D6.12	0.300694	0.322546	Least-adapted genes	GO:0016020, GO:0016021
Ce	T21D12.5	0.300711	0.371747	Least-adapted genes	GO:0016020, GO:0016021
Ce	ZK697.10	0.300794	0.359726	Least-adapted genes	GO:0016020, GO:0016021, GO:0005887, GO:0007186, GO:0038022, GO:0042048, GO:0050911
Ce	Y54G2A.5b	0.300828	0.579399	Least-adapted genes
Ce	Y66H1A.8b	0.301064	0.461988	Least-adapted genes
Ce	C02D4.2d	0.301065	0.441624	Least-adapted genes
Ce	Y39B6A.41	0.301078	0.409505	Least-adapted genes	GO:0016020, GO:0016021, GO:0022857, GO:0055085
Ce	Y39C12A.3b	0.30125	0.31962	Least-adapted genes
Ce	F26B1.6	0.301323	0.326198	Least-adapted genes	GO:0016020, GO:0016021, GO:0004888, GO:0007606
Ce	ZC518.8a	0.301369	0.371429	Least-adapted genes
Ce	F31B9.4	0.30142	0.437729	Least-adapted genes
Ce	F33D11.17	0.301453	0.416667	Least-adapted genes
Ce	Y67H2A.2b	0.301453	0.442308	Least-adapted genes
Ce	F56D6.4	0.301502	0.335323	Least-adapted genes	GO:0016020, GO:0016021
Ce	C04H5.6b	0.301518	0.44697	Least-adapted genes
Ce	K09D9.3	0.301596	0.308761	Least-adapted genes	GO:0016020, GO:0016021
Ce	W03D2.1e	0.301673	0.373494	Least-adapted genes
Ce	F59E12.3	0.301741	0.43662	Least-adapted genes	GO:0005634, GO:0005737, GO:0004674, GO:0018105, GO:0016055
Ce	Y57A10C.8	0.301744	0.389881	Least-adapted genes	GO:0016020, GO:0016021
Ce	M04B2.7b	0.301862	0.342541	Least-adapted genes
Ce	C06C3.12	0.301945	0.413858	Least-adapted genes
Ce	F23H12.10	0.301995	0.434343	Least-adapted genes
Ce	W02D3.13a	0.301999	0.348485	Least-adapted genes
Ce	C26B9.7	0.302026	0.390351	Least-adapted genes
Ce	ZK856.19	0.302143	0.313725	Least-adapted genes
Ce	AH10.4	0.302276	0.310502	Least-adapted genes
Ce	T01D1.7	0.302287	0.351052	Least-adapted genes	GO:0016020, GO:0016021
Ce	C33F10.13	0.302306	0.334249	Least-adapted genes	GO:0005515
Ce	C29F9.3b	0.302435	0.401606	Least-adapted genes
Ce	C09G12.15	0.30244	0.342193	Least-adapted genes	GO:0016020, GO:0016021
Ce	K08D8.2	0.302485	0.403846	Least-adapted genes	GO:0016020, GO:0016021
Ce	H24D24.1	0.3025	0.329524	Least-adapted genes	GO:0016020, GO:0016021, GO:0004930, GO:0007186, GO:0008528
Ce	E03D2.3	0.302509	0.35241	Least-adapted genes	GO:0016020, GO:0016021
Ce	Y26D4A.5a	0.302532	0.327485	Least-adapted genes
Ce	T23B12.5	0.302601	0.38189	Least-adapted genes	GO:0016020, GO:0016021, GO:0005789, GO:0006506, GO:0000139
Ce	M01B2.3	0.302706	0.325146	Least-adapted genes	GO:0016020, GO:0016021
Ce	K02H11.7	0.302765	0.363363	Least-adapted genes	GO:0016020, GO:0016021, GO:0005887, GO:0007186, GO:0038022, GO:0042048, GO:0050911
Ce	Y73B3A.20	0.302795	0.52968	Least-adapted genes
Ce	F57C2.4	0.302837	0.426966	Least-adapted genes
Ce	B0198.2a	0.30286	0.440559	Least-adapted genes
Ce	ZC513.11	0.302899	0.334347	Least-adapted genes	GO:0016020, GO:0016021, GO:0005887, GO:0007186, GO:0038022, GO:0042048, GO:0050911
Ce	Y39A1A.2c	0.302933	0.434457	Least-adapted genes
Ce	ZK816.1	0.303036	0.425397	Least-adapted genes	GO:0016020, GO:0016021
Ce	T27A1.7	0.303045	0.403304	Least-adapted genes	GO:0016020, GO:0016021
Ce	C24B9.15	0.303127	0.365828	Least-adapted genes	GO:0016020, GO:0016021, GO:0004888, GO:0007606
Ce	T10G3.4b	0.303145	0.341615	Least-adapted genes
Ce	M04B2.7c	0.303167	0.345168	Least-adapted genes
Ce	Y49F6A.2	0.303191	0.384216	Least-adapted genes	GO:0016020, GO:0016021
Ce	Y49F6A.3	0.303191	0.384216	Least-adapted genes	GO:0016020, GO:0016021
Ce	C47A10.4	0.303208	0.397996	Least-adapted genes	GO:0016020, GO:0016021, GO:0007606
Ce	C45G7.13	0.303312	0.488609	Least-adapted genes
Ce	C33D9.4	0.303339	0.345679	Least-adapted genes	GO:0016020, GO:0016021
Ce	F11D5.7	0.303405	0.358876	Least-adapted genes	GO:0016020, GO:0016021, GO:0022857, GO:0055085
Ce	F55C9.3	0.303439	0.329365	Least-adapted genes	GO:0005515
Ce	Y67D8B.4a	0.303447	0.490566	Least-adapted genes
Ce	F35G8.2	0.303479	0.403756	Least-adapted genes	GO:0005615
Ce	F49C5.2	0.303516	0.387879	Least-adapted genes	GO:0016020, GO:0016021
Ce	F18E3.4a	0.303549	0.3412	Least-adapted genes
Ce	C41H7.8	0.303578	0.342222	Least-adapted genes
Ce	F59B1.6	0.303594	0.366472	Least-adapted genes	GO:0016020, GO:0016021
Ce	F47G4.14	0.303623	0.611111	Least-adapted genes
Ce	K03D3.4	0.303623	0.325203	Least-adapted genes	GO:0016020, GO:0016021
Ce	F17A2.12	0.303641	0.337487	Least-adapted genes	GO:0016020, GO:0016021
Ce	Y75D11A.6	0.303642	0.425	Least-adapted genes
Ce	C54F6.10	0.303672	0.371345	Least-adapted genes	GO:0016020, GO:0016021
Ce	T21B6.5	0.303731	0.366876	Least-adapted genes	GO:0016020, GO:0016021, GO:0005794, GO:0022857, GO:0005457, GO:0015297, GO:0036066, GO:0036085
Ce	F55C9.6	0.303769	0.386091	Least-adapted genes
Ce	Y38H6C.17	0.30382	0.410256	Least-adapted genes	GO:0016020, GO:0016021, GO:0005774, GO:0003333, GO:0015171
Ce	Y77E11A.16	0.303827	0.408915	Least-adapted genes	GO:0016020, GO:0016021
Ce	Y26G10.6	0.303846	0.347619	Least-adapted genes
Ce	T24A6.9a	0.303854	0.392771	Least-adapted genes
Ce	T06E6.3	0.303904	0.365079	Least-adapted genes	GO:0016020, GO:0016021
Ce	R52.6	0.303953	0.413793	Least-adapted genes
Ce	F08E10.1	0.303981	0.401216	Least-adapted genes	GO:0016020, GO:0016021
Ce	F36G9.8	0.304089	0.387755	Least-adapted genes	GO:0016020, GO:0016021
Ce	Y39A3A.4	0.30409	0.449875	Least-adapted genes	GO:0016787, GO:0004725, GO:0006470, GO:0035335
Ce	Y44A6D.7a	0.304102	0.35942	Least-adapted genes
Ce	C12D8.13b	0.304131	0.311565	Least-adapted genes
Ce	Y39B6A.16	0.304219	0.451878	Least-adapted genes	GO:0016925, GO:0000795, GO:0007129, GO:0019789
Ce	M04B2.7g	0.304261	0.360239	Least-adapted genes
Ce	C37E2.2a	0.304317	0.340708	Least-adapted genes
Ce	Y54E10BL.1	0.304326	0.549451	Least-adapted genes
Ce	F47C12.5	0.304331	0.369396	Least-adapted genes	GO:0016020, GO:0016021
Ce	F55B12.9	0.30442	0.362963	Least-adapted genes	GO:0016020, GO:0016021
Ce	F19B2.8	0.304523	0.343404	Least-adapted genes	GO:0016020, GO:0016021
Ce	F57G9.1	0.30453	0.363128	Least-adapted genes	GO:0016020, GO:0016021, GO:0007606
Ce	F36D1.23	0.304558	0.32646	Least-adapted genes
Ce	C37F5.1a	0.304692	0.509804	Least-adapted genes
Ce	T10G3.4a	0.30477	0.340513	Least-adapted genes
Ce	R13.2	0.304809	0.391586	Least-adapted genes	GO:0003677, GO:0005634, GO:0006355, GO:0007275
Ce	W09D12.2	0.304852	0.334412	Least-adapted genes	GO:0016020, GO:0016021, GO:0004888, GO:0007606
Ce	F38H12.5	0.304858	0.339022	Least-adapted genes	GO:0016020, GO:0016021
Ce	ZK1037.8	0.304877	0.367708	Least-adapted genes	GO:0016020, GO:0016021
Ce	Y45F10B.5	0.304882	0.331295	Least-adapted genes	GO:0016020, GO:0016021
Ce	C09E9.1c	0.304909	0.475177	Least-adapted genes
Ce	R09A8.9	0.305032	0.461538	Least-adapted genes
Ce	C06B3.13	0.305069	0.321543	Least-adapted genes	GO:0016020, GO:0016021
Ce	T22F3.8	0.305094	0.400276	Least-adapted genes	GO:0016020, GO:0016021, GO:0022857, GO:0055085
Ce	D1007.2	0.305128	0.482759	Least-adapted genes	GO:0005581
Ce	F40G9.7	0.305262	0.387164	Least-adapted genes
Ce	K08G2.7	0.305279	0.335341	Least-adapted genes	GO:0016020, GO:0016021
Ce	R13A5.15	0.305368	0.360465	Least-adapted genes	GO:0016020, GO:0016021, GO:0004888, GO:0007606
Ce	C50F7.1b	0.305389	0.363874	Least-adapted genes
Ce	C31B8.13	0.305392	0.355828	Least-adapted genes	GO:0016020, GO:0016021
Ce	Y37F4.2	0.305408	0.380952	Least-adapted genes
Ce	R09F10.6	0.305429	0.33913	Least-adapted genes	GO:0016020, GO:0016021
Ce	Y17G9A.3a	0.305474	0.344681	Least-adapted genes
Ce	F31E9.2	0.305481	0.384444	Least-adapted genes	GO:0016020, GO:0016021, GO:0004888, GO:0007606
Ce	Y54G2A.5c	0.305569	0.586047	Least-adapted genes
Ce	W09G3.7b	0.30558	0.434343	Least-adapted genes
Ce	F10G2.6b	0.305679	0.328157	Least-adapted genes
Ce	T02D1.3	0.30568	0.339525	Least-adapted genes	GO:0016020, GO:0016021
Ce	C06B8.9	0.305682	0.367424	Least-adapted genes	GO:0016020, GO:0016021, GO:0007186, GO:0008528
Ce	C06B8.10	0.305702	0.373913	Least-adapted genes	GO:0016020, GO:0016021
Ce	Y105C5B.6c	0.305935	0.42549	Least-adapted genes
Ce	F41B5.12b	0.306008	0.413793	Least-adapted genes
Ce	K08D9.10	0.306054	0.371795	Least-adapted genes
Ce	F22E5.8	0.306085	0.37196	Least-adapted genes	GO:0051260, GO:0005515
Ce	Y39A3CR.6	0.306088	0.457516	Least-adapted genes	GO:0046983
Ce	C13B7.1	0.306154	0.400576	Least-adapted genes	GO:0016020, GO:0016021
Ce	Y45G12C.5	0.306154	0.400576	Least-adapted genes	GO:0016020, GO:0016021
